# Supplementary material
Source: publisher figshare collection journal article supplement (https://acs.figshare.com/ndownloader/files/5152924)
Supplement: Supplementary file 1 [file 5152924]

data_Compound1b 
 
_audit_creation_method            SHELXL-97 
# 1. SUBMISSION DETAILS                                                         
_publ_contact_author_name                       'Linda H. Doerrer'              
_publ_contact_author_address                                                    
;                                                                               
Barnard College, Chemistry Department                                           
3009 Broadway                                                                   
New York, NY, 10027                                                             
;                                                                               
_publ_contact_author_phone                      ' 212-854-2074 '                
_publ_contact_author_fax                        ' 212-854-2310 '                
_publ_contact_author_email        ' ldoerrer@barnard.edu '                      
_publ_requested_journal                         'Inorganic Chemistry'           
_publ_requested_coeditor_name                   ' Prof James Mayer '            
#============================================================================== 
# 3. TITLE AND AUTHOR LIST                                                      
_publ_section_title                                                             
;                                                                               
Homoleptic Cobalt and Copper Phenolate A2[M(OAr)4] Compounds
The Effect of Phenoxide Fluorination
;                                                                               
# The loop structure below should contain the names and addresses of all        
# authors, in the required order of publication. Repeat as necessary.           
loop_                                                                           
        _publ_author_name                                                       
        _publ_author_address                                                    
        _publ_author_footnote                                                   
'Buzzeo, Marisa C.'                               #<--'Last name, first name'   
;                                                                               
Barnard College, Chemistry Department                                           
3009 Broadway                                                                   
New York, NY, 10027                                                             
;                                                                               
'Iqbal, Amber H.'                                                               
;                                                                               
Barnard College, Chemistry Department                                           
3009 Broadway                                                                   
New York, NY, 10027                                                             
;                                                                               
'Long, Charli M.'                                                               
;                                                                               
Barnard College, Chemistry Department                                           
3009 Broadway                                                                   
New York, NY, 10027                                                             
;                                                                               
'Millar, David'                                                                 
;                                                                               
Barnard College, Chemistry Department                                           
3009 Broadway                                                                   
New York, NY, 10027                                                             
;                                                                               
'Patel, Sonal'                                                                  
;                                                                               
Barnard College, Chemistry Department                                           
3009 Broadway                                                                   
New York, NY, 10027                                                             
;                                                                               
'Pellow, Matthew A.'                                                            
;                                                                               
Barnard College, Chemistry Department                                           
3009 Broadway                                                                   
New York, NY, 10027                                                             
;                                                                               
'Saddoughi, Sahar A.'                                                           
;                                                                               
Barnard College, Chemistry Department                                           
3009 Broadway                                                                   
New York, NY, 10027                                                             
;                                                                               
'Smenton, Abigail L.'                                                           
;                                                                               
Barnard College, Chemistry Department                                           
3009 Broadway                                                                   
New York, NY, 10027                                                             
;                                                                               
'Turner, John F. C.'                                                            
;                                                                               
Department of Chemistry                                                         
408 Buehler Hall                                                                
University of Tennessee                                                         
Knoxville, TN 37996                                                             
;                                                                               
'Wadhawan, Jay D.'                                                              
;                                                                               
Physical and Theoretical Chemistry Laboratory                                   
University of Oxford                                                            
OXFORD OX1 3QZ, UK                                                              
;                                                                               
'Compton, Richard G.'
;                                                                          
Physical and Theoretical Chemistry Laboratory                                   
University of Oxford                                                            
OXFORD OX1 3QZ, UK                                                              
;                                                                               
'Golen, James A.'                                                               
;                                                                               
Department of Chemistry and Biochemistry                                        
MC 0358                                                                         
University of California, San Diego                                             
9500 Gilman Drive                                                               
La Jolla, CA 92093                                                              
;
;                                                                               
permanent address is the Department of Chemistry & Biochemistry, University of  
Massachusetts Dartmouth, North Dartmouth MA 02747                               
;                                                                               
'Rheingold, Arnold L.'                                                          
;                                                                               
Department of Chemistry and Biochemistry                                        
MC 0358                                                                         
University of California, San Diego                                             
9500 Gilman Drive                                                               
La Jolla, CA 92093                                                              
;                                                                               
#============================================================================== 
_chemical_name_systematic 
; 
 ? 
; 
_chemical_name_common             ? 
_chemical_melting_point           ? 
_chemical_formula_moiety          ? 
_chemical_formula_sum 
 'C28 H30 Cu0.50 F12 K O8' 
_chemical_formula_weight          793.39 
 
loop_ 
 _atom_type_symbol 
 _atom_type_description 
 _atom_type_scat_dispersion_real 
 _atom_type_scat_dispersion_imag 
 _atom_type_scat_source 
 'C'  'C'   0.0033   0.0016 
 'International Tables Vol C Tables 4.2.6.8 and 6.1.1.4' 
 'H'  'H'   0.0000   0.0000 
 'International Tables Vol C Tables 4.2.6.8 and 6.1.1.4' 
 'O'  'O'   0.0106   0.0060 
 'International Tables Vol C Tables 4.2.6.8 and 6.1.1.4' 
 'F'  'F'   0.0171   0.0103 
 'International Tables Vol C Tables 4.2.6.8 and 6.1.1.4' 
 'Cu'  'Cu'   0.3201   1.2651 
 'International Tables Vol C Tables 4.2.6.8 and 6.1.1.4' 
 'K'  'K'   0.2009   0.2494 
 'International Tables Vol C Tables 4.2.6.8 and 6.1.1.4' 
 
_symmetry_cell_setting            ? 
_symmetry_space_group_name_H-M    ? 
 
loop_ 
 _symmetry_equiv_pos_as_xyz 
 'x, y, z' 
 '-x, -y, -z' 
 
_cell_length_a                    12.3827(13) 
_cell_length_b                    13.0390(14) 
_cell_length_c                    13.2356(14) 
_cell_angle_alpha                 100.929(2) 
_cell_angle_beta                  112.815(2) 
_cell_angle_gamma                 111.913(2) 
_cell_volume                      1682.1(3) 
_cell_formula_units_Z             2 
_cell_measurement_temperature     293(2) 
_cell_measurement_reflns_used     ? 
_cell_measurement_theta_min       ? 
_cell_measurement_theta_max       ? 
 
_exptl_crystal_description        ? 
_exptl_crystal_colour             ? 
_exptl_crystal_size_max           ? 
_exptl_crystal_size_mid           ? 
_exptl_crystal_size_min           ? 
_exptl_crystal_density_meas       ? 
_exptl_crystal_density_diffrn     1.566 
_exptl_crystal_density_method     'not measured' 
_exptl_crystal_F_000              807 
_exptl_absorpt_coefficient_mu     0.578 
_exptl_absorpt_correction_type    ? 
_exptl_absorpt_correction_T_min   ? 
_exptl_absorpt_correction_T_max   ? 
_exptl_absorpt_process_details    ? 
 
_exptl_special_details 
; 
 ? 
; 
 
_diffrn_ambient_temperature       293(2) 
_diffrn_radiation_wavelength      0.71073 
_diffrn_radiation_type            MoK\a 
_diffrn_radiation_source          'fine-focus sealed tube' 
_diffrn_radiation_monochromator   graphite 
_diffrn_measurement_device_type   ? 
_diffrn_measurement_method        ? 
_diffrn_detector_area_resol_mean  ? 
_diffrn_standards_number          ? 
_diffrn_standards_interval_count  ? 
_diffrn_standards_interval_time   ? 
_diffrn_standards_decay_%         ? 
_diffrn_reflns_number             10718 
_diffrn_reflns_av_R_equivalents   0.0200 
_diffrn_reflns_av_sigmaI/netI     0.0236 
_diffrn_reflns_limit_h_min        -15 
_diffrn_reflns_limit_h_max        13 
_diffrn_reflns_limit_k_min        -15 
_diffrn_reflns_limit_k_max        16 
_diffrn_reflns_limit_l_min        -16 
_diffrn_reflns_limit_l_max        12 
_diffrn_reflns_theta_min          1.81 
_diffrn_reflns_theta_max          28.04 
_reflns_number_total              7145 
_reflns_number_gt                 5735 
_reflns_threshold_expression      >2sigma(I) 
 
_computing_data_collection        ? 
_computing_cell_refinement        ? 
_computing_data_reduction         ? 
_computing_structure_solution     'SHELXS-97 (Sheldrick, 1990)' 
_computing_structure_refinement   'SHELXL-97 (Sheldrick, 1997)' 
_computing_molecular_graphics     ? 
_computing_publication_material   ? 
 
_refine_special_details 
; 
 Refinement of F^2^ against ALL reflections.  The weighted R-factor wR and 
 goodness of fit S are based on F^2^, conventional R-factors R are based 
 on F, with F set to zero for negative F^2^. The threshold expression of 
 F^2^ > 2sigma(F^2^) is used only for calculating R-factors(gt) etc. and is 
 not relevant to the choice of reflections for refinement.  R-factors based 
 on F^2^ are statistically about twice as large as those based on F, and R- 
 factors based on ALL data will be even larger. 
; 
 
_refine_ls_structure_factor_coef  Fsqd  
_refine_ls_matrix_type            full 
_refine_ls_weighting_scheme       calc  
_refine_ls_weighting_details 
 'calc w=1/[\s^2^(Fo^2^)+(0.1799P)^2^+4.4065P] where P=(Fo^2^+2Fc^2^)/3' 
_atom_sites_solution_primary      direct 
_atom_sites_solution_secondary    difmap 
_atom_sites_solution_hydrogens    geom 
_refine_ls_hydrogen_treatment     mixed 
_refine_ls_extinction_method      none 
_refine_ls_extinction_coef        ? 
_refine_ls_number_reflns          7145 
_refine_ls_number_parameters      443 
_refine_ls_number_restraints      0 
_refine_ls_R_factor_all           0.1231 
_refine_ls_R_factor_gt            0.1050 
_refine_ls_wR_factor_ref          0.3145 
_refine_ls_wR_factor_gt           0.2885 
_refine_ls_goodness_of_fit_ref    1.079 
_refine_ls_restrained_S_all       1.079 
_refine_ls_shift/su_max           0.004 
_refine_ls_shift/su_mean          0.000 
 
loop_ 
 _atom_site_label 
 _atom_site_type_symbol 
 _atom_site_fract_x 
 _atom_site_fract_y 
 _atom_site_fract_z 
 _atom_site_U_iso_or_equiv 
 _atom_site_adp_type 
 _atom_site_occupancy 
 _atom_site_symmetry_multiplicity 
 _atom_site_calc_flag 
 _atom_site_refinement_flags 
 _atom_site_disorder_assembly 
 _atom_site_disorder_group 
Cu1 Cu 0.0000 0.0000 0.0000 0.0371(3) Uani 1 2 d S . . 
K1 K 0.10129(11) 0.30861(9) 0.06258(10) 0.0466(3) Uani 1 1 d . . . 
O1 O 0.0081(3) -0.0810(3) 0.1072(3) 0.0405(7) Uani 1 1 d . . . 
O2 O 0.1698(4) 0.1435(3) 0.1187(3) 0.0496(8) Uani 1 1 d . . . 
O3 O -0.1058(8) 0.1845(7) 0.0980(9) 0.131(3) Uani 1 1 d . . . 
O4 O 0.1351(9) 0.3820(8) 0.2940(6) 0.119(2) Uani 1 1 d . . . 
O5 O 0.3585(6) 0.4707(6) 0.2602(7) 0.111(2) Uani 1 1 d . . . 
O6 O 0.2999(10) 0.5030(6) 0.0504(8) 0.123(3) Uani 1 1 d . . . 
O7 O 0.0383(10) 0.3880(6) -0.1254(6) 0.114(3) Uani 1 1 d . . . 
O8 O -0.1626(6) 0.2694(6) -0.0798(6) 0.114(3) Uani 1 1 d . . . 
F11 F -0.1607(15) -0.2951(12) 0.4039(11) 0.110(4) Uiso 0.510(17) 1 d P A 1 
F12 F 0.0173(16) -0.1183(12) 0.5148(11) 0.110(4) Uiso 0.510(17) 1 d P A 1 
F13 F 0.0234(12) -0.2529(12) 0.4097(10) 0.091(4) Uiso 0.510(17) 1 d P A 1 
F11A F -0.1156(14) -0.3175(12) 0.3868(11) 0.105(4) Uiso 0.490(17) 1 d P A 2 
F12A F -0.0612(14) -0.1462(10) 0.5025(10) 0.093(4) Uiso 0.490(17) 1 d P A 2 
F13A F 0.0752(16) -0.1792(15) 0.4592(13) 0.113(5) Uiso 0.490(17) 1 d P A 2 
F14 F -0.4909(12) -0.2200(11) 0.1192(12) 0.106(4) Uiso 0.548(13) 1 d P B 1 
F15 F -0.4306(11) -0.1060(10) 0.0342(11) 0.096(3) Uiso 0.548(13) 1 d P B 1 
F16 F -0.3758(12) -0.0339(11) 0.2062(11) 0.112(4) Uiso 0.548(13) 1 d P B 1 
F14A F -0.4871(15) -0.2270(13) 0.0240(13) 0.115(5) Uiso 0.452(13) 1 d P B 2 
F15A F -0.3974(14) -0.0502(13) 0.0975(13) 0.100(4) Uiso 0.452(13) 1 d P B 2 
F16A F -0.4523(14) -0.1707(12) 0.1909(14) 0.100(4) Uiso 0.452(13) 1 d P B 2 
F21 F 0.4983(6) 0.1458(6) 0.5859(4) 0.122(2) Uani 1 1 d . . . 
F22 F 0.3031(9) 0.1199(9) 0.5196(6) 0.147(3) Uani 1 1 d . . . 
F23 F 0.3301(7) -0.0195(5) 0.4558(5) 0.115(2) Uani 1 1 d . . . 
F24 F 0.7545(12) 0.3282(11) 0.4156(11) 0.119(4) Uiso 0.598(15) 1 d P C 1 
F25 F 0.6528(13) 0.2218(13) 0.2314(12) 0.131(5) Uiso 0.598(15) 1 d P C 1 
F26 F 0.6672(13) 0.3914(12) 0.2921(12) 0.130(5) Uiso 0.598(15) 1 d P C 1 
F24A F 0.7252(19) 0.2401(18) 0.3534(17) 0.128(7) Uiso 0.402(15) 1 d P C 2 
F25A F 0.6450(15) 0.2937(15) 0.2139(14) 0.106(5) Uiso 0.402(15) 1 d P C 2 
F26A F 0.726(2) 0.3956(18) 0.3901(18) 0.130(7) Uiso 0.402(15) 1 d P C 2 
C11 C -0.0660(5) -0.1054(4) 0.1578(4) 0.0380(9) Uani 1 1 d . . . 
C12 C -0.1871(5) -0.1026(5) 0.1194(5) 0.0465(11) Uani 1 1 d . . . 
H12A H -0.2184 -0.0812 0.0553 0.056 Uiso 1 1 calc R . . 
C13 C -0.2609(6) -0.1316(5) 0.1763(5) 0.0549(13) Uani 1 1 d . B . 
C14 C -0.2196(7) -0.1647(6) 0.2704(5) 0.0607(15) Uani 1 1 d . . . 
H14A H -0.2707 -0.1852 0.3068 0.073 Uiso 1 1 calc R . . 
C15 C -0.0994(7) -0.1667(5) 0.3098(5) 0.0591(14) Uani 1 1 d . A . 
C16 C -0.0240(6) -0.1384(5) 0.2545(5) 0.0484(11) Uani 1 1 d . . . 
H16A H 0.0558 -0.1414 0.2821 0.058 Uiso 1 1 calc R . . 
C17 C -0.3900(8) -0.1293(8) 0.1321(8) 0.078(2) Uani 1 1 d . . . 
C18 C -0.0508(10) -0.2025(8) 0.4127(6) 0.087(3) Uani 1 1 d . . . 
C21 C 0.2759(5) 0.1555(4) 0.2071(4) 0.0432(10) Uani 1 1 d . . . 
C22 C 0.2744(5) 0.1214(4) 0.3010(4) 0.0461(11) Uani 1 1 d . . . 
H22A H 0.1940 0.0872 0.3014 0.055 Uiso 1 1 calc R . . 
C23 C 0.3907(6) 0.1378(5) 0.3931(4) 0.0537(13) Uani 1 1 d . . . 
C24 C 0.5128(6) 0.1907(6) 0.3988(5) 0.0631(15) Uani 1 1 d . . . 
H24A H 0.5902 0.2009 0.4610 0.076 Uiso 1 1 calc R . . 
C25 C 0.5169(6) 0.2281(6) 0.3090(5) 0.0638(15) Uani 1 1 d . C . 
C26 C 0.4027(6) 0.2117(5) 0.2159(5) 0.0532(12) Uani 1 1 d . . . 
H26A H 0.4093 0.2385 0.1571 0.064 Uiso 1 1 calc R . . 
C27 C 0.3813(7) 0.0970(7) 0.4887(5) 0.0689(17) Uani 1 1 d . . . 
C28 C 0.6479(8) 0.2907(11) 0.3116(8) 0.099(3) Uani 1 1 d . . . 
C31 C -0.072(3) 0.2186(17) 0.216(2) 0.236(15) Uani 1 1 d . . . 
H31A H -0.1391 0.2386 0.2193 0.283 Uiso 1 1 calc R . . 
H31B H -0.0897 0.1462 0.2315 0.283 Uiso 1 1 calc R . . 
C32 C 0.030(3) 0.294(2) 0.2979(16) 0.251(14) Uani 1 1 d . . . 
H32A H 0.0691 0.2528 0.3414 0.302 Uiso 1 1 calc R . . 
H32B H 0.0081 0.3368 0.3480 0.302 Uiso 1 1 calc R . . 
C33 C 0.2637(19) 0.4196(13) 0.3813(8) 0.150(7) Uani 1 1 d . . . 
H33A H 0.2799 0.3520 0.3761 0.181 Uiso 1 1 calc R . . 
H33B H 0.2740 0.4509 0.4590 0.181 Uiso 1 1 calc R . . 
C34 C 0.3647(12) 0.5159(10) 0.3668(10) 0.127(5) Uani 1 1 d . . . 
H34A H 0.3462 0.5821 0.3690 0.152 Uiso 1 1 calc R . . 
H34B H 0.4547 0.5464 0.4323 0.152 Uiso 1 1 calc R . . 
C35 C 0.4556(10) 0.5505(10) 0.2427(18) 0.157(7) Uani 1 1 d . . . 
H35A H 0.5433 0.5611 0.2941 0.189 Uiso 1 1 calc R . . 
H35B H 0.4603 0.6282 0.2627 0.189 Uiso 1 1 calc R . . 
C36 C 0.419(2) 0.5019(14) 0.116(3) 0.187(11) Uani 1 1 d . . . 
H36A H 0.4896 0.5517 0.1038 0.225 Uiso 1 1 calc R . . 
H36B H 0.4047 0.4208 0.0927 0.225 Uiso 1 1 calc R . . 
C37 C 0.266(2) 0.4771(10) -0.0664(15) 0.158(8) Uani 1 1 d . . . 
H37A H 0.2506 0.3974 -0.1033 0.190 Uiso 1 1 calc R . . 
H37B H 0.3374 0.5350 -0.0728 0.190 Uiso 1 1 calc R . . 
C38 C 0.142(3) 0.4838(12) -0.1235(14) 0.178(10) Uani 1 1 d . . . 
H38A H 0.1552 0.5598 -0.0793 0.214 Uiso 1 1 calc R . . 
H38B H 0.1195 0.4778 -0.2041 0.214 Uiso 1 1 calc R . . 
C39 C -0.074(3) 0.3960(19) -0.1673(14) 0.182(10) Uani 1 1 d . . . 
H39A H -0.0922 0.4109 -0.2395 0.219 Uiso 1 1 calc R . . 
H39B H -0.0635 0.4622 -0.1089 0.219 Uiso 1 1 calc R . . 
C40 C -0.1858(15) 0.2846(18) -0.1919(10) 0.163(8) Uani 1 1 d . . . 
H40A H -0.1930 0.2177 -0.2462 0.195 Uiso 1 1 calc R . . 
H40B H -0.2694 0.2864 -0.2289 0.195 Uiso 1 1 calc R . . 
C41 C -0.2467(9) 0.1545(12) -0.0911(18) 0.181(10) Uani 1 1 d . . . 
H41A H -0.3391 0.1255 -0.1511 0.217 Uiso 1 1 calc R . . 
H41B H -0.2188 0.0986 -0.1156 0.217 Uiso 1 1 calc R . . 
C42 C -0.2377(14) 0.1621(12) 0.019(2) 0.187(11) Uani 1 1 d . . . 
H42A H -0.3057 0.0877 0.0111 0.224 Uiso 1 1 calc R . . 
H42B H -0.2514 0.2270 0.0505 0.224 Uiso 1 1 calc R . . 
 
loop_ 
 _atom_site_aniso_label 
 _atom_site_aniso_U_11 
 _atom_site_aniso_U_22 
 _atom_site_aniso_U_33 
 _atom_site_aniso_U_23 
 _atom_site_aniso_U_13 
 _atom_site_aniso_U_12 
Cu1 0.0335(4) 0.0428(4) 0.0395(4) 0.0216(3) 0.0198(3) 0.0189(3) 
K1 0.0455(6) 0.0408(5) 0.0501(6) 0.0192(5) 0.0222(5) 0.0195(5) 
O1 0.0387(16) 0.0498(18) 0.0396(16) 0.0232(14) 0.0227(14) 0.0221(14) 
O2 0.0402(17) 0.0459(18) 0.051(2) 0.0223(16) 0.0137(15) 0.0186(15) 
O3 0.113(6) 0.114(5) 0.187(8) 0.059(5) 0.113(6) 0.037(4) 
O4 0.155(7) 0.147(6) 0.078(4) 0.058(4) 0.070(5) 0.078(6) 
O5 0.072(4) 0.072(3) 0.114(5) 0.005(3) 0.011(3) 0.020(3) 
O6 0.154(7) 0.079(4) 0.156(7) 0.037(4) 0.122(6) 0.033(4) 
O7 0.203(8) 0.108(5) 0.089(4) 0.062(4) 0.078(5) 0.113(6) 
O8 0.075(4) 0.097(4) 0.104(5) -0.012(3) 0.000(3) 0.054(4) 
F21 0.092(4) 0.144(5) 0.055(2) 0.042(3) -0.001(2) 0.026(3) 
F22 0.198(7) 0.275(9) 0.102(4) 0.118(5) 0.115(5) 0.176(8) 
F23 0.142(5) 0.089(3) 0.074(3) 0.040(3) 0.040(3) 0.032(3) 
C11 0.042(2) 0.034(2) 0.038(2) 0.0141(17) 0.0215(19) 0.0175(18) 
C12 0.048(3) 0.048(3) 0.051(3) 0.025(2) 0.028(2) 0.023(2) 
C13 0.056(3) 0.054(3) 0.061(3) 0.021(3) 0.038(3) 0.025(2) 
C14 0.073(4) 0.061(3) 0.058(3) 0.025(3) 0.047(3) 0.025(3) 
C15 0.074(4) 0.056(3) 0.047(3) 0.024(2) 0.035(3) 0.026(3) 
C16 0.056(3) 0.048(3) 0.043(2) 0.022(2) 0.025(2) 0.025(2) 
C17 0.071(4) 0.087(5) 0.109(6) 0.048(5) 0.068(4) 0.042(4) 
C18 0.110(6) 0.086(5) 0.054(4) 0.036(4) 0.049(4) 0.026(5) 
C21 0.040(2) 0.039(2) 0.040(2) 0.0116(19) 0.0152(19) 0.0166(19) 
C22 0.043(2) 0.043(2) 0.042(2) 0.012(2) 0.016(2) 0.019(2) 
C23 0.055(3) 0.055(3) 0.035(2) 0.007(2) 0.013(2) 0.028(3) 
C24 0.045(3) 0.076(4) 0.048(3) 0.011(3) 0.010(2) 0.031(3) 
C25 0.044(3) 0.079(4) 0.052(3) 0.013(3) 0.019(2) 0.026(3) 
C26 0.049(3) 0.059(3) 0.049(3) 0.019(2) 0.026(2) 0.024(2) 
C27 0.068(4) 0.078(4) 0.043(3) 0.019(3) 0.017(3) 0.034(3) 
C28 0.053(4) 0.150(9) 0.073(5) 0.020(5) 0.022(4) 0.050(5) 
C31 0.33(3) 0.128(12) 0.25(3) 0.037(14) 0.25(3) 0.019(15) 
C32 0.27(3) 0.28(3) 0.125(13) 0.111(16) 0.127(16) 0.02(2) 
C33 0.250(18) 0.139(10) 0.051(5) 0.027(5) 0.032(7) 0.137(13) 
C34 0.112(8) 0.087(6) 0.080(6) -0.005(5) -0.019(6) 0.045(6) 
C35 0.056(5) 0.072(6) 0.28(2) 0.036(9) 0.064(9) 0.009(4) 
C36 0.184(16) 0.107(10) 0.39(3) 0.108(15) 0.23(2) 0.088(11) 
C37 0.25(2) 0.066(6) 0.164(13) 0.036(7) 0.168(15) 0.026(9) 
C38 0.38(3) 0.086(7) 0.135(11) 0.078(8) 0.171(18) 0.123(14) 
C39 0.30(3) 0.215(18) 0.112(10) 0.087(12) 0.076(14) 0.22(2) 
C40 0.136(11) 0.231(18) 0.078(7) -0.003(9) -0.010(7) 0.147(13) 
C41 0.037(4) 0.102(8) 0.27(2) -0.044(11) 0.027(7) 0.024(5) 
C42 0.111(10) 0.087(7) 0.43(3) 0.101(14) 0.189(18) 0.051(7) 
 
_geom_special_details 
; 
 All esds (except the esd in the dihedral angle between two l.s. planes) 
 are estimated using the full covariance matrix.  The cell esds are taken 
 into account individually in the estimation of esds in distances, angles 
 and torsion angles; correlations between esds in cell parameters are only 
 used when they are defined by crystal symmetry.  An approximate (isotropic) 
 treatment of cell esds is used for estimating esds involving l.s. planes. 
; 
 
loop_ 
 _geom_bond_atom_site_label_1 
 _geom_bond_atom_site_label_2 
 _geom_bond_distance 
 _geom_bond_site_symmetry_2 
 _geom_bond_publ_flag 
Cu1 O1 1.917(3) . ? 
Cu1 O1 1.917(3) 2 ? 
Cu1 O2 1.944(4) . ? 
Cu1 O2 1.944(4) 2 ? 
Cu1 K1 3.5517(11) 2 ? 
Cu1 K1 3.5517(11) . ? 
K1 O2 2.718(4) . ? 
K1 O3 2.745(6) . ? 
K1 O1 2.793(4) 2 ? 
K1 O5 2.805(6) . ? 
K1 O7 2.819(6) . ? 
K1 O4 2.841(6) . ? 
K1 O8 2.847(6) . ? 
K1 O6 2.883(6) . ? 
K1 C11 3.307(4) 2 ? 
K1 C41 3.455(9) . ? 
K1 C36 3.476(15) . ? 
K1 C31 3.537(15) . ? 
O1 C11 1.315(6) . ? 
O1 K1 2.793(4) 2 ? 
O2 C21 1.306(6) . ? 
O3 C31 1.38(2) . ? 
O3 C42 1.43(2) . ? 
O4 C33 1.373(17) . ? 
O4 C32 1.407(19) . ? 
O5 C34 1.383(15) . ? 
O5 C35 1.398(15) . ? 
O6 C37 1.369(16) . ? 
O6 C36 1.40(2) . ? 
O7 C39 1.34(2) . ? 
O7 C38 1.41(2) . ? 
O8 C41 1.408(19) . ? 
O8 C40 1.464(19) . ? 
F11 C18 1.386(16) . ? 
F12 C18 1.267(14) . ? 
F13 C18 1.322(14) . ? 
F11A C18 1.306(15) . ? 
F12A C18 1.352(14) . ? 
F13A C18 1.318(17) . ? 
F14 C17 1.282(13) . ? 
F15 C17 1.334(14) . ? 
F16 C17 1.335(14) . ? 
F14A C17 1.395(16) . ? 
F15A C17 1.224(15) . ? 
F16A C17 1.344(15) . ? 
F21 C27 1.310(8) . ? 
F22 C27 1.292(9) . ? 
F23 C27 1.310(9) . ? 
F24 C28 1.315(14) . ? 
F25 C28 1.291(15) . ? 
F26 C28 1.337(17) . ? 
F24A C28 1.36(2) . ? 
F25A C28 1.288(18) . ? 
F26A C28 1.26(2) . ? 
C11 C16 1.398(7) . ? 
C11 C12 1.402(7) . ? 
C11 K1 3.307(4) 2 ? 
C12 C13 1.388(7) . ? 
C13 C14 1.369(9) . ? 
C13 C17 1.489(10) . ? 
C14 C15 1.386(10) . ? 
C15 C16 1.385(8) . ? 
C15 C18 1.500(10) . ? 
C21 C22 1.400(7) . ? 
C21 C26 1.409(8) . ? 
C22 C23 1.384(7) . ? 
C23 C24 1.372(9) . ? 
C23 C27 1.490(9) . ? 
C24 C25 1.378(10) . ? 
C25 C26 1.374(8) . ? 
C25 C28 1.503(11) . ? 
C31 C32 1.16(3) . ? 
C33 C34 1.51(2) . ? 
C35 C36 1.49(3) . ? 
C37 C38 1.47(3) . ? 
C39 C40 1.45(3) . ? 
C41 C42 1.41(3) . ? 
 
loop_ 
 _geom_angle_atom_site_label_1 
 _geom_angle_atom_site_label_2 
 _geom_angle_atom_site_label_3 
 _geom_angle 
 _geom_angle_site_symmetry_1 
 _geom_angle_site_symmetry_3 
 _geom_angle_publ_flag 
O1 Cu1 O1 180.00(16) . 2 ? 
O1 Cu1 O2 92.83(15) . . ? 
O1 Cu1 O2 87.17(15) 2 . ? 
O1 Cu1 O2 87.17(15) . 2 ? 
O1 Cu1 O2 92.83(15) 2 2 ? 
O2 Cu1 O2 180.0(6) . 2 ? 
O1 Cu1 K1 51.45(10) . 2 ? 
O1 Cu1 K1 128.55(10) 2 2 ? 
O2 Cu1 K1 130.72(10) . 2 ? 
O2 Cu1 K1 49.28(10) 2 2 ? 
O1 Cu1 K1 128.55(10) . . ? 
O1 Cu1 K1 51.45(10) 2 . ? 
O2 Cu1 K1 49.28(10) . . ? 
O2 Cu1 K1 130.72(10) 2 . ? 
K1 Cu1 K1 180.00(4) 2 . ? 
O2 K1 O3 81.4(2) . . ? 
O2 K1 O1 57.75(10) . 2 ? 
O3 K1 O1 81.4(2) . 2 ? 
O2 K1 O5 82.64(16) . . ? 
O3 K1 O5 119.4(3) . . ? 
O1 K1 O5 133.02(17) 2 . ? 
O2 K1 O7 139.34(16) . . ? 
O3 K1 O7 117.0(3) . . ? 
O1 K1 O7 87.89(15) 2 . ? 
O5 K1 O7 112.9(3) . . ? 
O2 K1 O4 85.60(19) . . ? 
O3 K1 O4 60.8(3) . . ? 
O1 K1 O4 131.31(19) 2 . ? 
O5 K1 O4 60.0(3) . . ? 
O7 K1 O4 135.0(2) . . ? 
O2 K1 O8 127.14(17) . . ? 
O3 K1 O8 58.8(3) . . ? 
O1 K1 O8 81.42(13) 2 . ? 
O5 K1 O8 145.51(19) . . ? 
O7 K1 O8 58.2(3) . . ? 
O4 K1 O8 101.1(2) . . ? 
O2 K1 O6 115.7(2) . . ? 
O3 K1 O6 160.4(2) . . ? 
O1 K1 O6 115.27(16) 2 . ? 
O5 K1 O6 57.6(3) . . ? 
O7 K1 O6 56.8(3) . . ? 
O4 K1 O6 108.9(2) . . ? 
O8 K1 O6 111.3(3) . . ? 
O2 K1 C11 64.12(12) . 2 ? 
O3 K1 C11 104.3(2) . 2 ? 
O1 K1 C11 22.97(10) 2 2 ? 
O5 K1 C11 119.71(19) . 2 ? 
O7 K1 C11 75.90(15) . 2 ? 
O4 K1 C11 148.64(19) . 2 ? 
O8 K1 C11 91.69(15) . 2 ? 
O6 K1 C11 92.40(16) . 2 ? 
O2 K1 C41 104.2(3) . . ? 
O3 K1 C41 41.2(5) . . ? 
O1 K1 C41 67.1(2) 2 . ? 
O5 K1 C41 155.4(4) . . ? 
O7 K1 C41 77.5(5) . . ? 
O4 K1 C41 96.6(4) . . ? 
O8 K1 C41 23.4(4) . . ? 
O6 K1 C41 133.5(5) . . ? 
C11 K1 C41 84.0(3) 2 . ? 
O2 K1 C36 93.8(3) . . ? 
O3 K1 C36 161.7(5) . . ? 
O1 K1 C36 111.1(3) 2 . ? 
O5 K1 C36 42.3(5) . . ? 
O7 K1 C36 77.9(5) . . ? 
O4 K1 C36 101.4(5) . . ? 
O8 K1 C36 134.3(4) . . ? 
O6 K1 C36 23.0(4) . . ? 
C11 K1 C36 89.2(3) 2 . ? 
C41 K1 C36 155.4(6) . . ? 
O2 K1 C31 79.2(5) . . ? 
O3 K1 C31 20.9(5) . . ? 
O1 K1 C31 97.6(3) 2 . ? 
O5 K1 C31 98.6(5) . . ? 
O7 K1 C31 130.7(6) . . ? 
O4 K1 C31 40.2(4) . . ? 
O8 K1 C31 74.2(6) . . ? 
O6 K1 C31 147.1(3) . . ? 
C11 K1 C31 120.3(3) 2 . ? 
C41 K1 C31 60.5(7) . . ? 
C36 K1 C31 140.9(7) . . ? 
C11 O1 Cu1 127.7(3) . . ? 
C11 O1 K1 101.0(3) . 2 ? 
Cu1 O1 K1 96.09(12) . 2 ? 
C21 O2 Cu1 130.2(3) . . ? 
C21 O2 K1 131.4(3) . . ? 
Cu1 O2 K1 97.89(13) . . ? 
C31 O3 C42 113.4(16) . . ? 
C31 O3 K1 114.0(10) . . ? 
C42 O3 K1 118.6(9) . . ? 
C33 O4 C32 116.3(13) . . ? 
C33 O4 K1 111.9(7) . . ? 
C32 O4 K1 109.8(9) . . ? 
C34 O5 C35 115.0(10) . . ? 
C34 O5 K1 116.7(7) . . ? 
C35 O5 K1 118.7(9) . . ? 
C37 O6 C36 111.4(14) . . ? 
C37 O6 K1 108.5(7) . . ? 
C36 O6 K1 103.1(7) . . ? 
C39 O7 C38 110.5(13) . . ? 
C39 O7 K1 118.2(10) . . ? 
C38 O7 K1 119.0(9) . . ? 
C41 O8 C40 115.6(12) . . ? 
C41 O8 K1 103.3(6) . . ? 
C40 O8 K1 113.4(7) . . ? 
O1 C11 C16 118.7(4) . . ? 
O1 C11 C12 124.1(4) . . ? 
C16 C11 C12 117.2(4) . . ? 
O1 C11 K1 56.0(2) . 2 ? 
C16 C11 K1 104.6(3) . 2 ? 
C12 C11 K1 108.3(3) . 2 ? 
C13 C12 C11 120.7(5) . . ? 
C14 C13 C12 121.8(6) . . ? 
C14 C13 C17 119.1(6) . . ? 
C12 C13 C17 119.2(6) . . ? 
C13 C14 C15 118.1(5) . . ? 
C16 C15 C14 121.2(5) . . ? 
C16 C15 C18 119.1(7) . . ? 
C14 C15 C18 119.6(6) . . ? 
C15 C16 C11 121.0(5) . . ? 
F15A C17 F14 124.3(10) . . ? 
F15A C17 F15 37.2(7) . . ? 
F14 C17 F15 108.1(10) . . ? 
F15A C17 F16 61.7(9) . . ? 
F14 C17 F16 105.4(9) . . ? 
F15 C17 F16 97.7(9) . . ? 
F15A C17 F16A 122.0(10) . . ? 
F14 C17 F16A 37.8(6) . . ? 
F15 C17 F16A 132.5(9) . . ? 
F16 C17 F16A 73.6(9) . . ? 
F15A C17 F14A 97.6(11) . . ? 
F14 C17 F14A 56.3(9) . . ? 
F15 C17 F14A 62.7(9) . . ? 
F16 C17 F14A 140.1(10) . . ? 
F16A C17 F14A 94.0(10) . . ? 
F15A C17 C13 118.7(8) . . ? 
F14 C17 C13 116.4(8) . . ? 
F15 C17 C13 116.4(7) . . ? 
F16 C17 C13 110.7(8) . . ? 
F16A C17 C13 110.2(8) . . ? 
F14A C17 C13 109.1(8) . . ? 
F12 C18 F11A 127.1(10) . . ? 
F12 C18 F13A 71.8(10) . . ? 
F11A C18 F13A 102.1(12) . . ? 
F12 C18 F13 106.0(11) . . ? 
F11A C18 F13 68.4(9) . . ? 
F13A C18 F13 38.0(7) . . ? 
F12 C18 F12A 37.0(7) . . ? 
F11A C18 F12A 107.1(10) . . ? 
F13A C18 F12A 106.4(10) . . ? 
F13 C18 F12A 132.4(10) . . ? 
F12 C18 F11 110.3(10) . . ? 
F11A C18 F11 34.5(7) . . ? 
F13A C18 F11 129.5(11) . . ? 
F13 C18 F11 101.8(10) . . ? 
F12A C18 F11 78.4(9) . . ? 
F12 C18 C15 115.3(9) . . ? 
F11A C18 C15 114.4(8) . . ? 
F13A C18 C15 115.4(8) . . ? 
F13 C18 C15 113.8(7) . . ? 
F12A C18 C15 110.8(9) . . ? 
F11 C18 C15 108.7(9) . . ? 
O2 C21 C22 123.8(5) . . ? 
O2 C21 C26 120.2(5) . . ? 
C22 C21 C26 115.9(5) . . ? 
C23 C22 C21 121.2(5) . . ? 
C24 C23 C22 121.9(6) . . ? 
C24 C23 C27 119.7(5) . . ? 
C22 C23 C27 118.3(6) . . ? 
C23 C24 C25 117.7(5) . . ? 
C26 C25 C24 121.5(6) . . ? 
C26 C25 C28 117.9(7) . . ? 
C24 C25 C28 120.7(6) . . ? 
C25 C26 C21 121.7(6) . . ? 
F22 C27 F23 104.3(8) . . ? 
F22 C27 F21 106.7(7) . . ? 
F23 C27 F21 106.6(7) . . ? 
F22 C27 C23 113.0(6) . . ? 
F23 C27 C23 112.6(5) . . ? 
F21 C27 C23 112.9(6) . . ? 
F26A C28 F25A 107.7(15) . . ? 
F26A C28 F25 135.2(13) . . ? 
F25A C28 F25 47.4(8) . . ? 
F26A C28 F24 51.6(10) . . ? 
F25A C28 F24 127.5(11) . . ? 
F25 C28 F24 108.8(10) . . ? 
F26A C28 F26 54.7(11) . . ? 
F25A C28 F26 61.2(10) . . ? 
F25 C28 F26 107.4(12) . . ? 
F24 C28 F26 103.2(11) . . ? 
F26A C28 F24A 98.6(13) . . ? 
F25A C28 F24A 105.8(12) . . ? 
F25 C28 F24A 65.1(11) . . ? 
F24 C28 F24A 48.9(9) . . ? 
F26 C28 F24A 136.3(12) . . ? 
F26A C28 C25 114.0(11) . . ? 
F25A C28 C25 118.7(9) . . ? 
F25 C28 C25 110.8(10) . . ? 
F24 C28 C25 113.5(9) . . ? 
F26 C28 C25 112.6(9) . . ? 
F24A C28 C25 109.9(12) . . ? 
C32 C31 O3 127.5(16) . . ? 
C32 C31 K1 82.3(12) . . ? 
O3 C31 K1 45.2(6) . . ? 
C31 C32 O4 125.5(14) . . ? 
O4 C33 C34 110.1(9) . . ? 
O5 C34 C33 110.7(8) . . ? 
O5 C35 C36 109.3(10) . . ? 
O6 C36 C35 105.7(10) . . ? 
O6 C36 K1 53.9(5) . . ? 
C35 C36 K1 86.1(7) . . ? 
O6 C37 C38 105.5(12) . . ? 
O7 C38 C37 108.1(9) . . ? 
O7 C39 C40 109.1(10) . . ? 
C39 C40 O8 108.9(10) . . ? 
C42 C41 O8 108.7(10) . . ? 
C42 C41 K1 86.6(8) . . ? 
O8 C41 K1 53.3(4) . . ? 
C41 C42 O3 106.9(9) . . ? 
 
_diffrn_measured_fraction_theta_max    0.876 
_diffrn_reflns_theta_full              28.04 
_diffrn_measured_fraction_theta_full   0.876 
_refine_diff_density_max    1.513 
_refine_diff_density_min   -0.955 
_refine_diff_density_rms    0.122
#===END 
data_Compound10 
 
_audit_creation_method            SHELXL-97 
# 1. SUBMISSION DETAILS                                                         
_publ_contact_author_name                       'Linda H. Doerrer'              
_publ_contact_author_address                                                    
;                                                                               
Barnard College, Chemistry Department                                           
3009 Broadway                                                                   
New York, NY, 10027                                                             
;                                                                               
_publ_contact_author_phone                      ' 212-854-2074 '                
_publ_contact_author_fax                        ' 212-854-2310 '                
_publ_contact_author_email        ' ldoerrer@barnard.edu '                      
_publ_requested_journal                         'Inorganic Chemistry'           
_publ_requested_coeditor_name                   ' Prof James Mayer '            
#============================================================================== 
# 3. TITLE AND AUTHOR LIST                                                      
_publ_section_title                                                             
;                                                                               
Homoleptic Cobalt and Copper Phenolate A2[M(OAr)4] Compounds
The Effect of Phenoxide Fluorination
;                                                                               
# The loop structure below should contain the names and addresses of all        
# authors, in the required order of publication. Repeat as necessary.           
loop_                                                                           
        _publ_author_name                                                       
        _publ_author_address                                                    
        _publ_author_footnote                                                   
'Buzzeo, Marisa C.'                               #<--'Last name, first name'   
;                                                                               
Barnard College, Chemistry Department                                           
3009 Broadway                                                                   
New York, NY, 10027                                                             
;                                                                               
'Iqbal, Amber H.'                                                               
;                                                                               
Barnard College, Chemistry Department                                           
3009 Broadway                                                                   
New York, NY, 10027                                                             
;                                                                               
'Long, Charli M.'                                                               
;                                                                               
Barnard College, Chemistry Department                                           
3009 Broadway                                                                   
New York, NY, 10027                                                             
;                                                                               
'Millar, David'                                                                 
;                                                                               
Barnard College, Chemistry Department                                           
3009 Broadway                                                                   
New York, NY, 10027                                                             
;                                                                               
'Patel, Sonal'                                                                  
;                                                                               
Barnard College, Chemistry Department                                           
3009 Broadway                                                                   
New York, NY, 10027                                                             
;                                                                               
'Pellow, Matthew A.'                                                            
;                                                                               
Barnard College, Chemistry Department                                           
3009 Broadway                                                                   
New York, NY, 10027                                                             
;                                                                               
'Saddoughi, Sahar A.'                                                           
;                                                                               
Barnard College, Chemistry Department                                           
3009 Broadway                                                                   
New York, NY, 10027                                                             
;                                                                               
'Smenton, Abigail L.'                                                           
;                                                                               
Barnard College, Chemistry Department                                           
3009 Broadway                                                                   
New York, NY, 10027                                                             
;                                                                               
'Turner, John F. C.'                                                            
;                                                                               
Department of Chemistry                                                         
408 Buehler Hall                                                                
University of Tennessee                                                         
Knoxville, TN 37996                                                             
;                                                                               
'Wadhawan, Jay D.'                                                              
;                                                                               
Physical and Theoretical Chemistry Laboratory                                   
University of Oxford                                                            
OXFORD OX1 3QZ, UK                                                              
;                                                                               
'Compton, Richard G.'
;                                                                          
Physical and Theoretical Chemistry Laboratory                                   
University of Oxford                                                            
OXFORD OX1 3QZ, UK                                                              
;                                                                               
'Golen, James A.'                                                               
;                                                                               
Department of Chemistry and Biochemistry                                        
MC 0358                                                                         
University of California, San Diego                                             
9500 Gilman Drive                                                               
La Jolla, CA 92093                                                              
;
;                                                                               
permanent address is the Department of Chemistry & Biochemistry, University of  
Massachusetts Dartmouth, North Dartmouth MA 02747                               
;                                                                               
'Rheingold, Arnold L.'                                                          
;                                                                               
Department of Chemistry and Biochemistry                                        
MC 0358                                                                         
University of California, San Diego                                             
9500 Gilman Drive                                                               
La Jolla, CA 92093                                                              
;                                                                               
#============================================================================== 
_chemical_name_systematic 
; 
 ? 
; 
_chemical_name_common             ? 
_chemical_melting_point           ? 
_chemical_formula_moiety          ? 
_chemical_formula_sum 
 'C52 H32 Co3 F24 O4' 
_chemical_formula_weight          1353.57 
 
loop_ 
 _atom_type_symbol 
 _atom_type_description 
 _atom_type_scat_dispersion_real 
 _atom_type_scat_dispersion_imag 
 _atom_type_scat_source 
 'C'  'C'   0.0033   0.0016 
 'International Tables Vol C Tables 4.2.6.8 and 6.1.1.4' 
 'H'  'H'   0.0000   0.0000 
 'International Tables Vol C Tables 4.2.6.8 and 6.1.1.4' 
 'O'  'O'   0.0106   0.0060 
 'International Tables Vol C Tables 4.2.6.8 and 6.1.1.4' 
 'F'  'F'   0.0171   0.0103 
 'International Tables Vol C Tables 4.2.6.8 and 6.1.1.4' 
 'Co'  'Co'   0.3494   0.9721 
 'International Tables Vol C Tables 4.2.6.8 and 6.1.1.4' 
 
_symmetry_cell_setting            ? 
_symmetry_space_group_name_H-M    ? 
 
loop_ 
 _symmetry_equiv_pos_as_xyz 
 'x, y, z' 
 '-x, y, -z+1/2' 
 'x+1/2, y+1/2, z' 
 '-x+1/2, y+1/2, -z+1/2' 
 '-x, -y, -z' 
 'x, -y, z-1/2' 
 '-x+1/2, -y+1/2, -z' 
 'x+1/2, -y+1/2, z-1/2' 
 
_cell_length_a                    24.202(3) 
_cell_length_b                    13.9911(17) 
_cell_length_c                    17.1697(19) 
_cell_angle_alpha                 90.00 
_cell_angle_beta                  114.678(2) 
_cell_angle_gamma                 90.00 
_cell_volume                      5282.9(11) 
_cell_formula_units_Z             4 
_cell_measurement_temperature     293(2) 
_cell_measurement_reflns_used     ? 
_cell_measurement_theta_min       ? 
_cell_measurement_theta_max       ? 
 
_exptl_crystal_description        ? 
_exptl_crystal_colour             ? 
_exptl_crystal_size_max           ? 
_exptl_crystal_size_mid           ? 
_exptl_crystal_size_min           ? 
_exptl_crystal_density_meas       ? 
_exptl_crystal_density_diffrn     1.702 
_exptl_crystal_density_method     'not measured' 
_exptl_crystal_F_000              2692 
_exptl_absorpt_coefficient_mu     1.061 
_exptl_absorpt_correction_type    ? 
_exptl_absorpt_correction_T_min   ? 
_exptl_absorpt_correction_T_max   ? 
_exptl_absorpt_process_details    ? 
 
_exptl_special_details 
; 
 ? 
; 
 
_diffrn_ambient_temperature       293(2) 
_diffrn_radiation_wavelength      0.71073 
_diffrn_radiation_type            MoK\a 
_diffrn_radiation_source          'fine-focus sealed tube' 
_diffrn_radiation_monochromator   graphite 
_diffrn_measurement_device_type   ? 
_diffrn_measurement_method        ? 
_diffrn_detector_area_resol_mean  ? 
_diffrn_standards_number          ? 
_diffrn_standards_interval_count  ? 
_diffrn_standards_interval_time   ? 
_diffrn_standards_decay_%         ? 
_diffrn_reflns_number             17151 
_diffrn_reflns_av_R_equivalents   0.0435 
_diffrn_reflns_av_sigmaI/netI     0.0546 
_diffrn_reflns_limit_h_min        -31 
_diffrn_reflns_limit_h_max        30 
_diffrn_reflns_limit_k_min        -18 
_diffrn_reflns_limit_k_max        17 
_diffrn_reflns_limit_l_min        -9 
_diffrn_reflns_limit_l_max        22 
_diffrn_reflns_theta_min          1.73 
_diffrn_reflns_theta_max          28.17 
_reflns_number_total              5957 
_reflns_number_gt                 3768 
_reflns_threshold_expression      >2sigma(I) 
 
_computing_data_collection        ? 
_computing_cell_refinement        ? 
_computing_data_reduction         ? 
_computing_structure_solution     'SHELXS-97 (Sheldrick, 1990)' 
_computing_structure_refinement   'SHELXL-97 (Sheldrick, 1997)' 
_computing_molecular_graphics     ? 
_computing_publication_material   ? 
 
_refine_special_details 
; 
 Refinement of F^2^ against ALL reflections.  The weighted R-factor wR and 
 goodness of fit S are based on F^2^, conventional R-factors R are based 
 on F, with F set to zero for negative F^2^. The threshold expression of 
 F^2^ > 2sigma(F^2^) is used only for calculating R-factors(gt) etc. and is 
 not relevant to the choice of reflections for refinement.  R-factors based 
 on F^2^ are statistically about twice as large as those based on F, and R- 
 factors based on ALL data will be even larger. 
; 
 
_refine_ls_structure_factor_coef  Fsqd  
_refine_ls_matrix_type            full 
_refine_ls_weighting_scheme       calc  
_refine_ls_weighting_details 
 'calc w=1/[\s^2^(Fo^2^)+(0.1506P)^2^+46.8343P] where P=(Fo^2^+2Fc^2^)/3' 
_atom_sites_solution_primary      direct 
_atom_sites_solution_secondary    difmap 
_atom_sites_solution_hydrogens    geom 
_refine_ls_hydrogen_treatment     mixed 
_refine_ls_extinction_method      none 
_refine_ls_extinction_coef        ? 
_refine_ls_number_reflns          5957 
_refine_ls_number_parameters      373 
_refine_ls_number_restraints      0 
_refine_ls_R_factor_all           0.1371 
_refine_ls_R_factor_gt            0.0967 
_refine_ls_wR_factor_ref          0.3172 
_refine_ls_wR_factor_gt           0.2937 
_refine_ls_goodness_of_fit_ref    1.099 
_refine_ls_restrained_S_all       1.099 
_refine_ls_shift/su_max           0.004 
_refine_ls_shift/su_mean          0.000 
 
loop_ 
 _atom_site_label 
 _atom_site_type_symbol 
 _atom_site_fract_x 
 _atom_site_fract_y 
 _atom_site_fract_z 
 _atom_site_U_iso_or_equiv 
 _atom_site_adp_type 
 _atom_site_occupancy 
 _atom_site_symmetry_multiplicity 
 _atom_site_calc_flag 
 _atom_site_refinement_flags 
 _atom_site_disorder_assembly 
 _atom_site_disorder_group 
Co1 Co 0.0000 0.54577(9) 0.2500 0.0382(4) Uani 1 2 d S . . 
Co2 Co -0.40400(5) 0.82213(7) 0.12614(6) 0.0462(3) Uani 1 1 d . . . 
F13 F -0.2361(4) 0.6453(6) 0.1902(5) 0.118(3) Uani 1 1 d . . . 
F11 F -0.2091(4) 0.7348(5) 0.1184(6) 0.121(3) Uani 1 1 d . . . 
F12 F -0.2943(3) 0.6663(6) 0.0619(5) 0.130(3) Uani 1 1 d . . . 
F21 F -0.1941(3) 0.8398(6) 0.3067(6) 0.117(3) Uani 1 1 d . . . 
F22 F -0.1500(4) 0.9735(5) 0.3572(8) 0.142(4) Uani 1 1 d . . . 
F23 F -0.1459(4) 0.8606(8) 0.4361(7) 0.142(3) Uani 1 1 d . . . 
F24 F 0.1043(5) 0.9063(9) 0.3571(9) 0.189(6) Uani 1 1 d . . . 
F25 F 0.0947(4) 0.9603(8) 0.4578(4) 0.166(5) Uani 1 1 d . . . 
F26 F 0.0489(5) 1.0144(7) 0.3355(8) 0.194(6) Uani 1 1 d . . . 
F14 F -0.2135(8) 0.3191(14) -0.0940(12) 0.129(6) Uiso 0.562(16) 1 d P A 1 
F15 F -0.2965(6) 0.3451(10) -0.0783(9) 0.100(5) Uiso 0.562(16) 1 d P A 1 
F16 F -0.2666(6) 0.4376(10) -0.1476(9) 0.096(5) Uiso 0.562(16) 1 d P A 1 
F14A F -0.2381(8) 0.2884(14) -0.0639(11) 0.101(6) Uiso 0.438(16) 1 d P A 2 
F15A F -0.2997(11) 0.4064(18) -0.1186(16) 0.140(9) Uiso 0.438(16) 1 d P A 2 
F16A F -0.2177(8) 0.3802(13) -0.1306(11) 0.098(6) Uiso 0.438(16) 1 d P A 2 
O1 O -0.0596(2) 0.4555(4) 0.1741(3) 0.0472(12) Uani 1 1 d . . . 
O2 O -0.0266(3) 0.6206(4) 0.3229(4) 0.0563(14) Uani 1 1 d . . . 
C1 C -0.4185(5) 0.9149(7) 0.0289(6) 0.066(2) Uani 1 1 d . . . 
H1A H -0.4552 0.9180 -0.0249 0.079 Uiso 1 1 calc R . . 
C2 C -0.3673(4) 0.8592(6) 0.0433(6) 0.059(2) Uani 1 1 d . . . 
H2A H -0.3617 0.8169 0.0016 0.070 Uiso 1 1 calc R . . 
C3 C -0.3247(4) 0.8750(7) 0.1287(6) 0.069(3) Uani 1 1 d . . . 
H3A H -0.2844 0.8458 0.1571 0.083 Uiso 1 1 calc R . . 
C4 C -0.3513(5) 0.9401(7) 0.1655(6) 0.073(3) Uani 1 1 d . . . 
H4A H -0.3323 0.9638 0.2246 0.087 Uiso 1 1 calc R . . 
C5 C -0.4090(5) 0.9650(6) 0.1047(8) 0.076(3) Uani 1 1 d . . . 
H5A H -0.4374 1.0096 0.1129 0.092 Uiso 1 1 calc R . . 
C6 C -0.4771(5) 0.7352(8) 0.0892(7) 0.076(3) Uani 1 1 d . . . 
H6A H -0.5126 0.7367 0.0338 0.091 Uiso 1 1 calc R . . 
C7 C -0.4245(6) 0.6812(7) 0.1092(7) 0.072(3) Uani 1 1 d . . . 
H7A H -0.4164 0.6388 0.0697 0.086 Uiso 1 1 calc R . . 
C8 C -0.3853(6) 0.6978(8) 0.1940(7) 0.081(3) Uani 1 1 d . . . 
H8A H -0.3451 0.6692 0.2253 0.097 Uiso 1 1 calc R . . 
C9 C -0.4146(5) 0.7653(8) 0.2271(6) 0.074(3) Uani 1 1 d . . . 
H9A H -0.3981 0.7911 0.2855 0.088 Uiso 1 1 calc R . . 
C10 C -0.4701(5) 0.7869(7) 0.1625(8) 0.079(3) Uani 1 1 d . . . 
H10A H -0.5000 0.8311 0.1670 0.095 Uiso 1 1 calc R . . 
C11 C -0.1170(3) 0.4763(5) 0.1241(4) 0.0399(15) Uani 1 1 d . . . 
C12 C -0.1509(3) 0.4199(6) 0.0520(5) 0.0467(17) Uani 1 1 d . . . 
H12A H -0.1326 0.3682 0.0382 0.056 Uiso 1 1 calc R . . 
C13 C -0.2113(4) 0.4407(6) 0.0017(5) 0.054(2) Uani 1 1 d . A . 
C14 C -0.2397(4) 0.5172(7) 0.0184(5) 0.057(2) Uani 1 1 d . . . 
H14A H -0.2797 0.5323 -0.0180 0.069 Uiso 1 1 calc R . . 
C15 C -0.2080(3) 0.5713(6) 0.0904(5) 0.0469(17) Uani 1 1 d . . . 
C16 C -0.1473(3) 0.5526(5) 0.1420(4) 0.0400(15) Uani 1 1 d . . . 
H16A H -0.1264 0.5914 0.1892 0.048 Uiso 1 1 calc R . . 
C17 C -0.2365(4) 0.6532(7) 0.1132(6) 0.065(2) Uani 1 1 d . . . 
C18 C -0.2458(5) 0.3815(9) -0.0776(7) 0.080(3) Uani 1 1 d . . . 
C21 C -0.0304(4) 0.7121(5) 0.3372(4) 0.0453(17) Uani 1 1 d . . . 
C22 C -0.0828(4) 0.7495(5) 0.3403(5) 0.0504(18) Uani 1 1 d . . . 
H22A H -0.1154 0.7092 0.3319 0.061 Uiso 1 1 calc R . . 
C23 C -0.0873(4) 0.8468(6) 0.3558(6) 0.058(2) Uani 1 1 d . . . 
C24 C -0.0402(4) 0.9075(6) 0.3684(5) 0.062(2) Uani 1 1 d . . . 
H24A H -0.0436 0.9723 0.3778 0.074 Uiso 1 1 calc R . . 
C25 C 0.0122(4) 0.8716(6) 0.3672(5) 0.055(2) Uani 1 1 d . . . 
C26 C 0.0171(4) 0.7757(6) 0.3516(5) 0.0518(19) Uani 1 1 d . . . 
H26A H 0.0530 0.7532 0.3508 0.062 Uiso 1 1 calc R . . 
C27 C 0.0634(5) 0.9384(8) 0.3812(7) 0.075(3) Uani 1 1 d . . . 
C28 C -0.1451(5) 0.8821(8) 0.3567(8) 0.085(3) Uani 1 1 d . . . 
 
loop_ 
 _atom_site_aniso_label 
 _atom_site_aniso_U_11 
 _atom_site_aniso_U_22 
 _atom_site_aniso_U_33 
 _atom_site_aniso_U_23 
 _atom_site_aniso_U_13 
 _atom_site_aniso_U_12 
Co1 0.0360(7) 0.0343(7) 0.0399(7) 0.000 0.0116(6) 0.000 
Co2 0.0520(6) 0.0454(6) 0.0383(5) 0.0009(4) 0.0159(4) 0.0150(5) 
F13 0.142(7) 0.140(6) 0.093(5) -0.003(4) 0.071(5) 0.053(5) 
F11 0.120(6) 0.064(4) 0.199(9) -0.028(5) 0.087(6) 0.013(4) 
F12 0.058(4) 0.140(7) 0.140(7) -0.061(5) -0.009(4) 0.050(4) 
F21 0.062(4) 0.125(6) 0.136(6) -0.051(5) 0.014(4) 0.009(4) 
F22 0.123(6) 0.067(5) 0.248(11) -0.020(6) 0.089(7) 0.023(4) 
F23 0.130(7) 0.182(9) 0.141(8) -0.035(7) 0.084(6) 0.005(7) 
F24 0.175(10) 0.180(11) 0.266(15) -0.117(11) 0.147(11) -0.126(9) 
F25 0.166(8) 0.239(11) 0.064(4) -0.035(5) 0.020(5) -0.149(8) 
F26 0.121(7) 0.141(8) 0.233(12) 0.101(8) -0.012(7) -0.065(6) 
O1 0.037(2) 0.040(3) 0.050(3) -0.006(2) 0.004(2) 0.005(2) 
O2 0.081(4) 0.038(3) 0.059(3) -0.005(2) 0.038(3) 0.001(3) 
C1 0.074(6) 0.064(6) 0.063(5) 0.019(5) 0.031(5) 0.014(5) 
C2 0.068(5) 0.054(5) 0.064(5) -0.001(4) 0.038(5) 0.006(4) 
C3 0.053(5) 0.077(6) 0.074(6) -0.017(5) 0.023(5) -0.001(5) 
C4 0.084(7) 0.072(6) 0.061(5) -0.022(5) 0.029(5) -0.013(5) 
C5 0.093(8) 0.040(5) 0.111(8) 0.008(5) 0.057(7) 0.018(5) 
C6 0.081(7) 0.071(7) 0.070(6) 0.006(5) 0.026(5) -0.017(6) 
C7 0.114(9) 0.048(5) 0.071(6) -0.001(4) 0.055(6) 0.003(5) 
C8 0.102(8) 0.064(6) 0.080(7) 0.029(5) 0.041(6) 0.034(6) 
C9 0.100(8) 0.079(7) 0.046(5) 0.003(5) 0.036(5) 0.007(6) 
C10 0.095(8) 0.055(5) 0.114(9) 0.009(6) 0.069(8) 0.008(5) 
C11 0.038(3) 0.040(4) 0.039(3) 0.005(3) 0.013(3) 0.000(3) 
C12 0.042(4) 0.045(4) 0.049(4) -0.015(3) 0.015(3) 0.000(3) 
C13 0.048(4) 0.056(5) 0.051(4) -0.008(4) 0.013(4) 0.002(4) 
C14 0.036(4) 0.070(6) 0.051(4) -0.008(4) 0.004(3) 0.007(4) 
C15 0.044(4) 0.048(4) 0.049(4) -0.003(3) 0.021(3) 0.008(3) 
C16 0.039(3) 0.039(4) 0.037(3) -0.003(3) 0.011(3) -0.002(3) 
C17 0.050(5) 0.071(6) 0.065(5) -0.009(5) 0.016(4) 0.013(4) 
C18 0.058(6) 0.099(8) 0.064(6) -0.017(6) 0.006(5) 0.031(6) 
C21 0.058(4) 0.036(4) 0.036(3) -0.006(3) 0.014(3) -0.003(3) 
C22 0.058(5) 0.039(4) 0.047(4) -0.008(3) 0.015(4) -0.004(3) 
C23 0.065(5) 0.048(5) 0.053(5) -0.010(4) 0.019(4) 0.003(4) 
C24 0.069(6) 0.040(4) 0.056(5) -0.014(4) 0.007(4) -0.007(4) 
C25 0.064(5) 0.046(4) 0.037(4) -0.003(3) 0.004(4) -0.012(4) 
C26 0.055(4) 0.059(5) 0.036(3) 0.000(3) 0.013(3) 0.005(4) 
C27 0.069(6) 0.071(6) 0.063(6) -0.002(5) 0.005(5) -0.025(5) 
C28 0.077(7) 0.062(6) 0.104(9) -0.033(6) 0.025(7) 0.010(5) 
 
_geom_special_details 
; 
 All esds (except the esd in the dihedral angle between two l.s. planes) 
 are estimated using the full covariance matrix.  The cell esds are taken 
 into account individually in the estimation of esds in distances, angles 
 and torsion angles; correlations between esds in cell parameters are only 
 used when they are defined by crystal symmetry.  An approximate (isotropic) 
 treatment of cell esds is used for estimating esds involving l.s. planes. 
; 
 
loop_ 
 _geom_bond_atom_site_label_1 
 _geom_bond_atom_site_label_2 
 _geom_bond_distance 
 _geom_bond_site_symmetry_2 
 _geom_bond_publ_flag 
Co1 O2 1.937(5) . ? 
Co1 O2 1.937(5) 2 ? 
Co1 O1 1.951(5) . ? 
Co1 O1 1.951(5) 2 ? 
Co2 C10 2.006(10) . ? 
Co2 C9 2.018(9) . ? 
Co2 C6 2.019(10) . ? 
Co2 C4 2.023(10) . ? 
Co2 C7 2.024(9) . ? 
Co2 C5 2.027(9) . ? 
Co2 C1 2.026(9) . ? 
Co2 C2 2.035(9) . ? 
Co2 C8 2.037(10) . ? 
Co2 C3 2.039(10) . ? 
F13 C17 1.323(12) . ? 
F11 C17 1.305(12) . ? 
F12 C17 1.318(11) . ? 
F21 C28 1.282(12) . ? 
F22 C28 1.286(12) . ? 
F23 C28 1.404(16) . ? 
F24 C27 1.302(15) . ? 
F25 C27 1.251(11) . ? 
F26 C27 1.281(13) . ? 
F14 C18 1.28(2) . ? 
F15 C18 1.323(18) . ? 
F16 C18 1.345(17) . ? 
F14A C18 1.32(2) . ? 
F15A C18 1.25(3) . ? 
F16A C18 1.35(2) . ? 
O1 C11 1.325(8) . ? 
O2 C21 1.313(9) . ? 
C1 C2 1.395(13) . ? 
C1 C5 1.411(14) . ? 
C2 C3 1.414(13) . ? 
C3 C4 1.408(13) . ? 
C4 C5 1.395(15) . ? 
C6 C7 1.395(15) . ? 
C6 C10 1.399(15) . ? 
C7 C8 1.386(15) . ? 
C8 C9 1.433(14) . ? 
C9 C10 1.372(15) . ? 
C11 C16 1.401(10) . ? 
C11 C12 1.406(10) . ? 
C12 C13 1.382(11) . ? 
C13 C14 1.366(12) . ? 
C13 C18 1.513(13) . ? 
C14 C15 1.378(11) . ? 
C15 C16 1.388(10) . ? 
C15 C17 1.472(12) . ? 
C21 C26 1.391(11) . ? 
C21 C22 1.395(11) . ? 
C22 C23 1.400(11) . ? 
C23 C24 1.363(13) . ? 
C23 C28 1.489(14) . ? 
C24 C25 1.373(13) . ? 
C25 C26 1.383(12) . ? 
C25 C27 1.488(13) . ? 
 
loop_ 
 _geom_angle_atom_site_label_1 
 _geom_angle_atom_site_label_2 
 _geom_angle_atom_site_label_3 
 _geom_angle 
 _geom_angle_site_symmetry_1 
 _geom_angle_site_symmetry_3 
 _geom_angle_publ_flag 
O2 Co1 O2 114.5(3) . 2 ? 
O2 Co1 O1 115.4(2) . . ? 
O2 Co1 O1 105.7(2) 2 . ? 
O2 Co1 O1 105.7(2) . 2 ? 
O2 Co1 O1 115.4(2) 2 2 ? 
O1 Co1 O1 99.3(3) . 2 ? 
C10 Co2 C9 39.9(4) . . ? 
C10 Co2 C6 40.7(4) . . ? 
C9 Co2 C6 67.9(4) . . ? 
C10 Co2 C4 124.8(4) . . ? 
C9 Co2 C4 108.8(4) . . ? 
C6 Co2 C4 160.9(5) . . ? 
C10 Co2 C7 68.0(4) . . ? 
C9 Co2 C7 68.2(4) . . ? 
C6 Co2 C7 40.4(4) . . ? 
C4 Co2 C7 157.7(5) . . ? 
C10 Co2 C5 107.7(4) . . ? 
C9 Co2 C5 121.6(4) . . ? 
C6 Co2 C5 124.0(5) . . ? 
C4 Co2 C5 40.3(4) . . ? 
C7 Co2 C5 160.4(5) . . ? 
C10 Co2 C1 121.9(4) . . ? 
C9 Co2 C1 156.9(4) . . ? 
C6 Co2 C1 107.4(4) . . ? 
C4 Co2 C1 67.7(4) . . ? 
C7 Co2 C1 123.9(4) . . ? 
C5 Co2 C1 40.8(4) . . ? 
C10 Co2 C2 156.6(5) . . ? 
C9 Co2 C2 161.8(4) . . ? 
C6 Co2 C2 121.0(4) . . ? 
C4 Co2 C2 68.1(4) . . ? 
C7 Co2 C2 107.4(4) . . ? 
C5 Co2 C2 68.4(4) . . ? 
C1 Co2 C2 40.2(4) . . ? 
C10 Co2 C8 68.1(5) . . ? 
C9 Co2 C8 41.4(4) . . ? 
C6 Co2 C8 67.8(5) . . ? 
C4 Co2 C8 123.2(5) . . ? 
C7 Co2 C8 39.9(4) . . ? 
C5 Co2 C8 158.2(5) . . ? 
C1 Co2 C8 159.9(4) . . ? 
C2 Co2 C8 124.1(4) . . ? 
C10 Co2 C3 161.4(5) . . ? 
C9 Co2 C3 125.4(4) . . ? 
C6 Co2 C3 156.7(4) . . ? 
C4 Co2 C3 40.5(4) . . ? 
C7 Co2 C3 121.9(4) . . ? 
C5 Co2 C3 68.3(4) . . ? 
C1 Co2 C3 67.8(4) . . ? 
C2 Co2 C3 40.6(4) . . ? 
C8 Co2 C3 108.4(5) . . ? 
C11 O1 Co1 125.0(4) . . ? 
C21 O2 Co1 135.6(5) . . ? 
C2 C1 C5 108.9(9) . . ? 
C2 C1 Co2 70.2(5) . . ? 
C5 C1 Co2 69.6(5) . . ? 
C1 C2 C3 107.7(8) . . ? 
C1 C2 Co2 69.6(5) . . ? 
C3 C2 Co2 69.9(5) . . ? 
C4 C3 C2 107.2(9) . . ? 
C4 C3 Co2 69.1(6) . . ? 
C2 C3 Co2 69.5(5) . . ? 
C5 C4 C3 109.1(9) . . ? 
C5 C4 Co2 70.0(6) . . ? 
C3 C4 Co2 70.4(6) . . ? 
C4 C5 C1 107.0(8) . . ? 
C4 C5 Co2 69.7(6) . . ? 
C1 C5 Co2 69.6(5) . . ? 
C7 C6 C10 107.6(10) . . ? 
C7 C6 Co2 70.0(6) . . ? 
C10 C6 Co2 69.2(6) . . ? 
C8 C7 C6 108.8(9) . . ? 
C8 C7 Co2 70.6(6) . . ? 
C6 C7 Co2 69.6(6) . . ? 
C7 C8 C9 107.0(10) . . ? 
C7 C8 Co2 69.5(6) . . ? 
C9 C8 Co2 68.6(5) . . ? 
C10 C9 C8 107.6(9) . . ? 
C10 C9 Co2 69.6(6) . . ? 
C8 C9 Co2 70.0(5) . . ? 
C9 C10 C6 108.9(10) . . ? 
C9 C10 Co2 70.5(6) . . ? 
C6 C10 Co2 70.1(6) . . ? 
O1 C11 C16 121.8(6) . . ? 
O1 C11 C12 121.1(6) . . ? 
C16 C11 C12 117.1(6) . . ? 
C13 C12 C11 120.5(7) . . ? 
C14 C13 C12 121.8(7) . . ? 
C14 C13 C18 118.7(7) . . ? 
C12 C13 C18 119.3(7) . . ? 
C13 C14 C15 118.5(7) . . ? 
C14 C15 C16 120.9(7) . . ? 
C14 C15 C17 121.3(7) . . ? 
C16 C15 C17 117.7(7) . . ? 
C15 C16 C11 121.0(6) . . ? 
F11 C17 F12 107.0(9) . . ? 
F11 C17 F13 102.3(9) . . ? 
F12 C17 F13 104.1(9) . . ? 
F11 C17 C15 114.7(8) . . ? 
F12 C17 C15 114.5(8) . . ? 
F13 C17 C15 113.1(9) . . ? 
F15A C18 F14 131.2(16) . . ? 
F15A C18 F14A 114.4(18) . . ? 
F14 C18 F14A 46.6(10) . . ? 
F15A C18 F15 49.8(12) . . ? 
F14 C18 F15 112.7(14) . . ? 
F14A C18 F15 71.6(13) . . ? 
F15A C18 F16 54.4(12) . . ? 
F14 C18 F16 103.7(13) . . ? 
F14A C18 F16 134.9(12) . . ? 
F15 C18 F16 102.5(10) . . ? 
F15A C18 F16A 109.1(16) . . ? 
F14 C18 F16A 46.7(10) . . ? 
F14A C18 F16A 92.0(12) . . ? 
F15 C18 F16A 135.9(12) . . ? 
F16 C18 F16A 60.6(11) . . ? 
F15A C18 C13 114.2(14) . . ? 
F14 C18 C13 114.4(11) . . ? 
F14A C18 C13 113.3(11) . . ? 
F15 C18 C13 112.4(10) . . ? 
F16 C18 C13 110.1(11) . . ? 
F16A C18 C13 111.7(12) . . ? 
O2 C21 C26 122.7(8) . . ? 
O2 C21 C22 120.5(7) . . ? 
C26 C21 C22 116.7(7) . . ? 
C21 C22 C23 121.1(8) . . ? 
C24 C23 C22 120.7(9) . . ? 
C24 C23 C28 121.2(8) . . ? 
C22 C23 C28 118.1(9) . . ? 
C23 C24 C25 119.1(8) . . ? 
C24 C25 C26 120.7(8) . . ? 
C24 C25 C27 118.7(9) . . ? 
C26 C25 C27 120.6(9) . . ? 
C25 C26 C21 121.7(8) . . ? 
F25 C27 F26 109.4(11) . . ? 
F25 C27 F24 102.3(11) . . ? 
F26 C27 F24 98.1(12) . . ? 
F25 C27 C25 115.0(9) . . ? 
F26 C27 C25 115.2(9) . . ? 
F24 C27 C25 115.0(10) . . ? 
F21 C28 F22 113.6(10) . . ? 
F21 C28 F23 99.6(11) . . ? 
F22 C28 F23 99.6(10) . . ? 
F21 C28 C23 116.9(8) . . ? 
F22 C28 C23 114.9(11) . . ? 
F23 C28 C23 109.4(10) . . ? 
 
_diffrn_measured_fraction_theta_max    0.917 
_diffrn_reflns_theta_full              28.17 
_diffrn_measured_fraction_theta_full   0.917 
_refine_diff_density_max    1.227 
_refine_diff_density_min   -0.730 
_refine_diff_density_rms    0.133
#===END 
data_Compound12 
  
_audit_creation_method            SHELXL-97 
# 1. SUBMISSION DETAILS                                                         
_publ_contact_author_name                       'Linda H. Doerrer'              
_publ_contact_author_address                                                    
;                                                                               
Barnard College, Chemistry Department                                           
3009 Broadway                                                                   
New York, NY, 10027                                                             
;                                                                               
_publ_contact_author_phone                      ' 212-854-2074 '                
_publ_contact_author_fax                        ' 212-854-2310 '                
_publ_contact_author_email        ' ldoerrer@barnard.edu '                      
_publ_requested_journal                         'Inorganic Chemistry'           
_publ_requested_coeditor_name                   ' Prof James Mayer '            
#============================================================================== 
# 3. TITLE AND AUTHOR LIST                                                      
_publ_section_title                                                             
;                                                                               
Homoleptic Cobalt and Copper Phenolate A2[M(OAr)4] Compounds
The Effect of Phenoxide Fluorination
;                                                                               
# The loop structure below should contain the names and addresses of all        
# authors, in the required order of publication. Repeat as necessary.           
loop_                                                                           
        _publ_author_name                                                       
        _publ_author_address                                                    
        _publ_author_footnote                                                   
'Buzzeo, Marisa C.'                               #<--'Last name, first name'   
;                                                                               
Barnard College, Chemistry Department                                           
3009 Broadway                                                                   
New York, NY, 10027                                                             
;                                                                               
'Iqbal, Amber H.'                                                               
;                                                                               
Barnard College, Chemistry Department                                           
3009 Broadway                                                                   
New York, NY, 10027                                                             
;                                                                               
'Long, Charli M.'                                                               
;                                                                               
Barnard College, Chemistry Department                                           
3009 Broadway                                                                   
New York, NY, 10027                                                             
;                                                                               
'Millar, David'                                                                 
;                                                                               
Barnard College, Chemistry Department                                           
3009 Broadway                                                                   
New York, NY, 10027                                                             
;                                                                               
'Patel, Sonal'                                                                  
;                                                                               
Barnard College, Chemistry Department                                           
3009 Broadway                                                                   
New York, NY, 10027                                                             
;                                                                               
'Pellow, Matthew A.'                                                            
;                                                                               
Barnard College, Chemistry Department                                           
3009 Broadway                                                                   
New York, NY, 10027                                                             
;                                                                               
'Saddoughi, Sahar A.'                                                           
;                                                                               
Barnard College, Chemistry Department                                           
3009 Broadway                                                                   
New York, NY, 10027                                                             
;                                                                               
'Smenton, Abigail L.'                                                           
;                                                                               
Barnard College, Chemistry Department                                           
3009 Broadway                                                                   
New York, NY, 10027                                                             
;                                                                               
'Turner, John F. C.'                                                            
;                                                                               
Department of Chemistry                                                         
408 Buehler Hall                                                                
University of Tennessee                                                         
Knoxville, TN 37996                                                             
;                                                                               
'Wadhawan, Jay D.'                                                              
;                                                                               
Physical and Theoretical Chemistry Laboratory                                   
University of Oxford                                                            
OXFORD OX1 3QZ, UK                                                              
;                                                                               
'Compton, Richard G.'
;                                                                          
Physical and Theoretical Chemistry Laboratory                                   
University of Oxford                                                            
OXFORD OX1 3QZ, UK                                                              
;                                                                               
'Golen, James A.'                                                               
;                                                                               
Department of Chemistry and Biochemistry                                        
MC 0358                                                                         
University of California, San Diego                                             
9500 Gilman Drive                                                               
La Jolla, CA 92093                                                              
;
;                                                                               
permanent address is the Department of Chemistry & Biochemistry, University of  
Massachusetts Dartmouth, North Dartmouth MA 02747                               
;                                                                               
'Rheingold, Arnold L.'                                                          
;                                                                               
Department of Chemistry and Biochemistry                                        
MC 0358                                                                         
University of California, San Diego                                             
9500 Gilman Drive                                                               
La Jolla, CA 92093                                                              
;                                                                               
#============================================================================== 

_chemical_name_systematic 
; 
 ? 
; 
_chemical_name_common             ? 
_chemical_melting_point           ? 
_chemical_formula_moiety          ? 
_chemical_formula_sum 
 'C60 H40 Cl2 Co F10 O2 P2' 
_chemical_formula_weight          1174.69 
  
loop_ 
 _atom_type_symbol 
 _atom_type_description 
 _atom_type_scat_dispersion_real 
 _atom_type_scat_dispersion_imag 
 _atom_type_scat_source 
 'C'  'C'   0.0033   0.0016 
 'International Tables Vol C Tables 4.2.6.8 and 6.1.1.4' 
 'H'  'H'   0.0000   0.0000 
 'International Tables Vol C Tables 4.2.6.8 and 6.1.1.4' 
 'O'  'O'   0.0106   0.0060 
 'International Tables Vol C Tables 4.2.6.8 and 6.1.1.4' 
 'F'  'F'   0.0171   0.0103 
 'International Tables Vol C Tables 4.2.6.8 and 6.1.1.4' 
 'P'  'P'   0.1023   0.0942 
 'International Tables Vol C Tables 4.2.6.8 and 6.1.1.4' 
 'Co'  'Co'   0.3494   0.9721 
 'International Tables Vol C Tables 4.2.6.8 and 6.1.1.4' 
 'Cl'  'Cl'   0.1484   0.1585 
 'International Tables Vol C Tables 4.2.6.8 and 6.1.1.4' 
  
_symmetry_cell_setting            Monoclinic 
_symmetry_space_group_name_H-M    P2(1)/c 
  
loop_ 
 _symmetry_equiv_pos_as_xyz 
 'x, y, z' 
 '-x, y+1/2, -z+1/2' 
 '-x, -y, -z' 
 'x, -y-1/2, z-1/2' 
  
_cell_length_a                    19.7866(13) 
_cell_length_b                    14.2273(10) 
_cell_length_c                    18.6950(13) 
_cell_angle_alpha                 90.00 
_cell_angle_beta                  95.7510(10) 
_cell_angle_gamma                 90.00 
_cell_volume                      5236.3(6) 
_cell_formula_units_Z             4 
_cell_measurement_temperature     100(2) 
_cell_measurement_reflns_used     ? 
_cell_measurement_theta_min       ? 
_cell_measurement_theta_max       ? 
  
_exptl_crystal_description        Block 
_exptl_crystal_colour             Blue 
_exptl_crystal_size_max           0.30 
_exptl_crystal_size_mid           0.20 
_exptl_crystal_size_min           0.10 
_exptl_crystal_density_meas       0 
_exptl_crystal_density_diffrn     1.490 
_exptl_crystal_density_method     'not measured' 
_exptl_crystal_F_000              2388 
_exptl_absorpt_coefficient_mu     0.571 
_exptl_absorpt_correction_type    'Multi-scan'
_exptl_absorpt_correction_T_min   0.921
_exptl_absorpt_correction_T_max   1.000
_exptl_absorpt_process_details    SADABS
  
_exptl_special_details 
; 
 ? 
; 
  
_diffrn_ambient_temperature       100(2) 
_diffrn_radiation_wavelength      0.71073 
_diffrn_radiation_type            MoK\a 
_diffrn_radiation_source          'fine-focus sealed tube' 
_diffrn_radiation_monochromator   graphite 
_diffrn_measurement_device_type   'CCD area detector' 
_diffrn_measurement_method        'phi and omega scans' 
_diffrn_detector_area_resol_mean  ? 
_diffrn_standards_number          ? 
_diffrn_standards_interval_count  ? 
_diffrn_standards_interval_time   ? 
_diffrn_standards_decay_%         ? 
_diffrn_reflns_number             33218 
_diffrn_reflns_av_R_equivalents   0.0379 
_diffrn_reflns_av_sigmaI/netI     0.0559 
_diffrn_reflns_limit_h_min        -26 
_diffrn_reflns_limit_h_max        25 
_diffrn_reflns_limit_k_min        -18 
_diffrn_reflns_limit_k_max        18 
_diffrn_reflns_limit_l_min        -24 
_diffrn_reflns_limit_l_max        21 
_diffrn_reflns_theta_min          1.03 
_diffrn_reflns_theta_max          28.30 
_reflns_number_total              12328 
_reflns_number_gt                 8797 
_reflns_threshold_expression      >2sigma(I) 
  
_computing_data_collection        'Bruker SMART' 
_computing_cell_refinement        'Bruker SMART' 
_computing_data_reduction         'Bruker SAINT' 
_computing_structure_solution     'SHELXS-97 (Sheldrick, 1990)' 
_computing_structure_refinement   'SHELXL-97 (Sheldrick, 1997)' 
_computing_molecular_graphics     'Bruker SHELXTL' 
_computing_publication_material   'Bruker SHELXTL' 
  
_refine_special_details 
; 
 Refinement of F^2^ against ALL reflections.  The weighted R-factor wR and 
 goodness of fit S are based on F^2^, conventional R-factors R are based 
 on F, with F set to zero for negative F^2^. The threshold expression of 
 F^2^ > 2sigma(F^2^) is used only for calculating R-factors(gt) etc. and is 
 not relevant to the choice of reflections for refinement.  R-factors based 
 on F^2^ are statistically about twice as large as those based on F, and R- 
 factors based on ALL data will be even larger. 
; 
  
_refine_ls_structure_factor_coef  Fsqd 
_refine_ls_matrix_type            full 
_refine_ls_weighting_scheme       calc 
_refine_ls_weighting_details 
 'calc w=1/[\s^2^(Fo^2^)+(0.0796P)^2^+2.4353P] where P=(Fo^2^+2Fc^2^)/3' 
_atom_sites_solution_primary      direct 
_atom_sites_solution_secondary    difmap 
_atom_sites_solution_hydrogens    geom 
_refine_ls_hydrogen_treatment     mixed 
_refine_ls_extinction_method      none 
_refine_ls_extinction_coef        ? 
_refine_ls_number_reflns          12328 
_refine_ls_number_parameters      694 
_refine_ls_number_restraints      0 
_refine_ls_R_factor_all           0.0795 
_refine_ls_R_factor_gt            0.0527 
_refine_ls_wR_factor_ref          0.1527 
_refine_ls_wR_factor_gt           0.1386 
_refine_ls_goodness_of_fit_ref    1.033 
_refine_ls_restrained_S_all       1.033 
_refine_ls_shift/su_max           0.000 
_refine_ls_shift/su_mean          0.000 
  
loop_ 
 _atom_site_label 
 _atom_site_type_symbol 
 _atom_site_fract_x 
 _atom_site_fract_y 
 _atom_site_fract_z 
 _atom_site_U_iso_or_equiv 
 _atom_site_adp_type 
 _atom_site_occupancy 
 _atom_site_symmetry_multiplicity 
 _atom_site_calc_flag 
 _atom_site_refinement_flags 
 _atom_site_disorder_assembly 
 _atom_site_disorder_group 
Co1 Co 0.22444(2) 0.05762(3) 0.37274(2) 0.02858(11) Uani 1 1 d . . . 
Cl1 Cl 0.30632(3) 0.09374(5) 0.29981(4) 0.02966(16) Uani 1 1 d . . . 
Cl2 Cl 0.13446(3) -0.01720(6) 0.31113(4) 0.03466(18) Uani 1 1 d . . . 
P1 P -0.02954(4) -0.28359(5) 0.45810(4) 0.02584(16) Uani 1 1 d . . . 
P2 P 0.42071(4) 0.59599(5) 0.20260(4) 0.02567(16) Uani 1 1 d . . . 
O1 O 0.20580(12) 0.17716(15) 0.41930(11) 0.0388(5) Uani 1 1 d . . . 
O2 O 0.25640(12) -0.01718(16) 0.45811(11) 0.0383(5) Uani 1 1 d . . . 
F1 F 0.15325(10) 0.23014(15) 0.28276(10) 0.0490(5) Uani 1 1 d . . . 
F2 F 0.18730(11) 0.39665(16) 0.22702(10) 0.0528(5) Uani 1 1 d . . . 
F3 F 0.27734(10) 0.51338(13) 0.30367(11) 0.0471(5) Uani 1 1 d . . . 
F4 F 0.33112(11) 0.46044(15) 0.43642(11) 0.0534(5) Uani 1 1 d . . . 
F5 F 0.29501(10) 0.29820(14) 0.49503(9) 0.0454(5) Uani 1 1 d . . . 
F6 F 0.18667(11) -0.15526(14) 0.52314(11) 0.0489(5) Uani 1 1 d . . . 
F7 F 0.23942(13) -0.32703(14) 0.54317(12) 0.0620(6) Uani 1 1 d . . . 
F8 F 0.36301(13) -0.37113(15) 0.49833(13) 0.0654(6) Uani 1 1 d . . . 
F9 F 0.43039(11) -0.23628(16) 0.42856(12) 0.0562(6) Uani 1 1 d . . . 
F10 F 0.37985(10) -0.06440(14) 0.40959(11) 0.0477(5) Uani 1 1 d . . . 
C1 C 0.22229(15) 0.2571(2) 0.39119(15) 0.0298(6) Uani 1 1 d . . . 
C2 C 0.19604(16) 0.2875(2) 0.32250(16) 0.0339(7) Uani 1 1 d . . . 
C3 C 0.21406(16) 0.3715(2) 0.29351(15) 0.0353(7) Uani 1 1 d . . . 
C4 C 0.25940(16) 0.4302(2) 0.33148(17) 0.0344(7) Uani 1 1 d . . . 
C5 C 0.28623(16) 0.4033(2) 0.39847(16) 0.0345(7) Uani 1 1 d . . . 
C6 C 0.26740(16) 0.3195(2) 0.42774(15) 0.0314(6) Uani 1 1 d . . . 
C7 C 0.28008(16) -0.1009(2) 0.46423(16) 0.0334(7) Uani 1 1 d . . . 
C8 C 0.24761(17) -0.1732(2) 0.49845(17) 0.0381(7) Uani 1 1 d . . . 
C9 C 0.2744(2) -0.2625(2) 0.50980(18) 0.0429(8) Uani 1 1 d . . . 
C10 C 0.3356(2) -0.2844(2) 0.4872(2) 0.0461(9) Uani 1 1 d . . . 
C11 C 0.37054(18) -0.2171(2) 0.45250(17) 0.0414(8) Uani 1 1 d . . . 
C12 C 0.34309(17) -0.1285(2) 0.44215(16) 0.0363(7) Uani 1 1 d . . . 
C13 C -0.05183(14) -0.1651(2) 0.43337(14) 0.0274(6) Uani 1 1 d . . . 
C14 C -0.11289(15) -0.1298(2) 0.45275(15) 0.0312(6) Uani 1 1 d . . . 
H14A H -0.1432 -0.1697 0.4748 0.037 Uiso 1 1 calc R . . 
C15 C -0.12940(16) -0.0365(2) 0.43987(17) 0.0357(7) Uani 1 1 d . . . 
H15A H -0.1711 -0.0122 0.4531 0.043 Uiso 1 1 calc R . . 
C16 C -0.08492(17) 0.0214(2) 0.40753(17) 0.0382(7) Uani 1 1 d . . . 
H16A H -0.0962 0.0856 0.3991 0.046 Uiso 1 1 calc R . . 
C17 C -0.02462(17) -0.0133(2) 0.38745(17) 0.0365(7) Uani 1 1 d . . . 
H17A H 0.0052 0.0267 0.3647 0.044 Uiso 1 1 calc R . . 
C18 C -0.00738(15) -0.1066(2) 0.40037(15) 0.0313(6) Uani 1 1 d . . . 
H18A H 0.0343 -0.1306 0.3869 0.038 Uiso 1 1 calc R . . 
C19 C -0.10486(14) -0.3538(2) 0.44756(15) 0.0276(6) Uani 1 1 d . . . 
C20 C -0.11993(15) -0.4171(2) 0.50054(16) 0.0299(6) Uani 1 1 d . . . 
H20A H -0.0917 -0.4211 0.5447 0.036 Uiso 1 1 calc R . . 
C21 C -0.17656(16) -0.4743(2) 0.48810(17) 0.0351(7) Uani 1 1 d . . . 
H21A H -0.1877 -0.5170 0.5242 0.042 Uiso 1 1 calc R . . 
C22 C -0.21679(16) -0.4696(2) 0.42349(18) 0.0377(7) Uani 1 1 d . . . 
H22A H -0.2551 -0.5099 0.4152 0.045 Uiso 1 1 calc R . . 
C23 C -0.20196(16) -0.4066(2) 0.37054(17) 0.0381(7) Uani 1 1 d . . . 
H23A H -0.2300 -0.4038 0.3263 0.046 Uiso 1 1 calc R . . 
C24 C -0.14660(16) -0.3482(2) 0.38222(16) 0.0335(7) Uani 1 1 d . . . 
H24A H -0.1366 -0.3044 0.3464 0.040 Uiso 1 1 calc R . . 
C25 C 0.00473(14) -0.2888(2) 0.55065(15) 0.0276(6) Uani 1 1 d . . . 
C26 C -0.02513(15) -0.2352(2) 0.60126(16) 0.0321(6) Uani 1 1 d . . . 
H26A H -0.0607 -0.1925 0.5864 0.039 Uiso 1 1 calc R . . 
C27 C -0.00250(17) -0.2448(2) 0.67377(16) 0.0372(7) Uani 1 1 d . . . 
H27A H -0.0222 -0.2079 0.7086 0.045 Uiso 1 1 calc R . . 
C28 C 0.04860(16) -0.3080(2) 0.69530(16) 0.0371(7) Uani 1 1 d . . . 
H28A H 0.0636 -0.3146 0.7449 0.045 Uiso 1 1 calc R . . 
C29 C 0.07821(16) -0.3619(2) 0.64504(16) 0.0353(7) Uani 1 1 d . . . 
H29A H 0.1135 -0.4050 0.6601 0.042 Uiso 1 1 calc R . . 
C30 C 0.05620(15) -0.3525(2) 0.57292(16) 0.0327(7) Uani 1 1 d . . . 
H30A H 0.0762 -0.3895 0.5384 0.039 Uiso 1 1 calc R . . 
C31 C 0.03113(15) -0.3318(2) 0.40190(15) 0.0301(6) Uani 1 1 d . . . 
C32 C 0.01278(17) -0.4049(2) 0.35488(16) 0.0354(7) Uani 1 1 d . . . 
H32A H -0.0314 -0.4315 0.3533 0.043 Uiso 1 1 calc R . . 
C33 C 0.0592(2) -0.4392(2) 0.30999(18) 0.0450(8) Uani 1 1 d . . . 
H33A H 0.0467 -0.4894 0.2779 0.054 Uiso 1 1 calc R . . 
C34 C 0.12324(19) -0.4005(3) 0.31208(18) 0.0450(9) Uani 1 1 d . . . 
H34A H 0.1545 -0.4235 0.2809 0.054 Uiso 1 1 calc R . . 
C35 C 0.14207(17) -0.3282(3) 0.35952(18) 0.0425(8) Uani 1 1 d . . . 
H35A H 0.1864 -0.3021 0.3610 0.051 Uiso 1 1 calc R . . 
C36 C 0.09675(16) -0.2938(2) 0.40478(17) 0.0375(7) Uani 1 1 d . . . 
H36A H 0.1100 -0.2447 0.4377 0.045 Uiso 1 1 calc R . . 
C37 C 0.35416(15) 0.6773(2) 0.21793(15) 0.0289(6) Uani 1 1 d . . . 
C38 C 0.28740(15) 0.6620(2) 0.18869(15) 0.0320(6) Uani 1 1 d . . . 
H38A H 0.2756 0.6055 0.1633 0.038 Uiso 1 1 calc R . . 
C39 C 0.23853(16) 0.7293(2) 0.19676(17) 0.0382(7) Uani 1 1 d . . . 
H39A H 0.1929 0.7184 0.1776 0.046 Uiso 1 1 calc R . . 
C40 C 0.25542(17) 0.8125(2) 0.23253(17) 0.0411(8) Uani 1 1 d . . . 
H40A H 0.2216 0.8589 0.2373 0.049 Uiso 1 1 calc R . . 
C41 C 0.32162(18) 0.8279(2) 0.26137(17) 0.0406(8) Uani 1 1 d . . . 
H41A H 0.3332 0.8852 0.2858 0.049 Uiso 1 1 calc R . . 
C42 C 0.37111(16) 0.7604(2) 0.25488(16) 0.0334(7) Uani 1 1 d . . . 
H42A H 0.4164 0.7708 0.2755 0.040 Uiso 1 1 calc R . . 
C43 C 0.46871(15) 0.6423(2) 0.13391(15) 0.0311(6) Uani 1 1 d . . . 
C44 C 0.47571(17) 0.7398(2) 0.12606(17) 0.0392(7) Uani 1 1 d . . . 
H44A H 0.4505 0.7813 0.1530 0.047 Uiso 1 1 calc R . . 
C45 C 0.51909(19) 0.7756(3) 0.07941(19) 0.0472(9) Uani 1 1 d . . . 
H45A H 0.5240 0.8416 0.0746 0.057 Uiso 1 1 calc R . . 
C46 C 0.55525(19) 0.7151(3) 0.03980(19) 0.0488(9) Uani 1 1 d . . . 
H46A H 0.5852 0.7396 0.0078 0.059 Uiso 1 1 calc R . . 
C47 C 0.54803(19) 0.6189(3) 0.04656(19) 0.0489(9) Uani 1 1 d . . . 
H47A H 0.5725 0.5776 0.0187 0.059 Uiso 1 1 calc R . . 
C48 C 0.50485(17) 0.5823(3) 0.09417(18) 0.0403(8) Uani 1 1 d . . . 
H48A H 0.5004 0.5162 0.0992 0.048 Uiso 1 1 calc R . . 
C49 C 0.47676(14) 0.5841(2) 0.28380(15) 0.0270(6) Uani 1 1 d . . . 
C50 C 0.54605(15) 0.5744(2) 0.28009(17) 0.0351(7) Uani 1 1 d . . . 
H50A H 0.5642 0.5780 0.2350 0.042 Uiso 1 1 calc R . . 
C51 C 0.58874(17) 0.5593(3) 0.34283(18) 0.0430(8) Uani 1 1 d . . . 
H51A H 0.6363 0.5529 0.3407 0.052 Uiso 1 1 calc R . . 
C52 C 0.56219(17) 0.5537(2) 0.40811(17) 0.0388(7) Uani 1 1 d . . . 
H52A H 0.5915 0.5432 0.4508 0.047 Uiso 1 1 calc R . . 
C53 C 0.49335(17) 0.5632(2) 0.41165(16) 0.0347(7) Uani 1 1 d . . . 
H53A H 0.4755 0.5593 0.4569 0.042 Uiso 1 1 calc R . . 
C54 C 0.44980(15) 0.5782(2) 0.34985(15) 0.0286(6) Uani 1 1 d . . . 
H54A H 0.4023 0.5844 0.3524 0.034 Uiso 1 1 calc R . . 
C55 C 0.38697(14) 0.4826(2) 0.17778(15) 0.0284(6) Uani 1 1 d . . . 
C56 C 0.39319(16) 0.4077(2) 0.22706(16) 0.0340(7) Uani 1 1 d . . . 
H56A H 0.4181 0.4159 0.2728 0.041 Uiso 1 1 calc R . . 
C57 C 0.36282(18) 0.3219(2) 0.20880(18) 0.0409(8) Uani 1 1 d . . . 
H57A H 0.3667 0.2714 0.2422 0.049 Uiso 1 1 calc R . . 
C58 C 0.32683(17) 0.3099(2) 0.14193(18) 0.0396(7) Uani 1 1 d . . . 
H58A H 0.3060 0.2511 0.1299 0.047 Uiso 1 1 calc R . . 
C59 C 0.32092(16) 0.3833(2) 0.09208(17) 0.0372(7) Uani 1 1 d . . . 
H59A H 0.2963 0.3745 0.0463 0.045 Uiso 1 1 calc R . . 
C60 C 0.35122(15) 0.4689(2) 0.10994(16) 0.0322(6) Uani 1 1 d . . . 
H60A H 0.3478 0.5188 0.0760 0.039 Uiso 1 1 calc R . . 
  
loop_ 
 _atom_site_aniso_label 
 _atom_site_aniso_U_11 
 _atom_site_aniso_U_22 
 _atom_site_aniso_U_33 
 _atom_site_aniso_U_23 
 _atom_site_aniso_U_13 
 _atom_site_aniso_U_12 
Co1 0.0313(2) 0.0269(2) 0.0286(2) -0.00207(15) 0.00795(16) -0.00080(16) 
Cl1 0.0257(3) 0.0375(4) 0.0264(3) 0.0027(3) 0.0056(3) 0.0005(3) 
Cl2 0.0248(3) 0.0449(4) 0.0357(4) -0.0195(3) 0.0101(3) -0.0164(3) 
P1 0.0265(4) 0.0291(4) 0.0218(3) 0.0028(3) 0.0019(3) 0.0012(3) 
P2 0.0266(4) 0.0300(4) 0.0202(3) 0.0025(3) 0.0016(3) 0.0030(3) 
O1 0.0569(14) 0.0273(11) 0.0358(12) -0.0001(9) 0.0230(10) -0.0006(10) 
O2 0.0494(13) 0.0354(12) 0.0308(11) 0.0064(9) 0.0072(10) 0.0079(10) 
F1 0.0526(12) 0.0585(13) 0.0356(10) -0.0125(9) 0.0021(9) -0.0141(10) 
F2 0.0586(13) 0.0711(15) 0.0269(10) 0.0131(9) -0.0041(9) 0.0078(11) 
F3 0.0530(12) 0.0362(11) 0.0539(12) 0.0162(9) 0.0134(10) 0.0008(9) 
F4 0.0564(13) 0.0524(13) 0.0489(12) -0.0008(10) -0.0069(10) -0.0199(10) 
F5 0.0559(12) 0.0526(12) 0.0259(9) 0.0078(8) -0.0048(8) 0.0069(9) 
F6 0.0550(12) 0.0390(11) 0.0552(12) -0.0003(9) 0.0183(10) -0.0029(9) 
F7 0.0969(18) 0.0292(11) 0.0625(14) 0.0020(10) 0.0210(13) -0.0097(11) 
F8 0.0938(18) 0.0333(11) 0.0682(15) 0.0017(10) 0.0038(13) 0.0182(12) 
F9 0.0487(12) 0.0584(14) 0.0598(14) -0.0059(11) -0.0027(10) 0.0095(10) 
F10 0.0492(12) 0.0411(11) 0.0537(12) -0.0009(9) 0.0100(9) -0.0059(9) 
C1 0.0370(16) 0.0269(15) 0.0272(15) 0.0000(11) 0.0116(12) 0.0031(12) 
C2 0.0374(17) 0.0367(17) 0.0278(15) -0.0064(12) 0.0045(13) -0.0022(13) 
C3 0.0365(17) 0.0449(18) 0.0240(15) 0.0083(13) 0.0014(12) 0.0061(14) 
C4 0.0364(17) 0.0309(16) 0.0366(17) 0.0115(13) 0.0078(13) 0.0024(13) 
C5 0.0346(16) 0.0353(17) 0.0332(16) -0.0022(13) 0.0017(13) -0.0027(13) 
C6 0.0370(16) 0.0344(16) 0.0227(14) 0.0035(12) 0.0023(12) 0.0059(13) 
C7 0.0441(18) 0.0299(16) 0.0259(15) -0.0063(12) 0.0018(13) -0.0007(13) 
C8 0.0463(19) 0.0355(17) 0.0326(16) -0.0066(13) 0.0040(14) -0.0010(14) 
C9 0.068(2) 0.0255(16) 0.0362(18) -0.0051(13) 0.0089(16) -0.0075(16) 
C10 0.061(2) 0.0264(17) 0.048(2) -0.0077(14) -0.0059(17) 0.0086(16) 
C11 0.052(2) 0.0382(18) 0.0330(17) -0.0074(14) -0.0002(15) 0.0126(15) 
C12 0.0434(18) 0.0338(16) 0.0308(16) -0.0043(13) -0.0005(13) -0.0058(14) 
C13 0.0302(15) 0.0302(15) 0.0220(13) 0.0031(11) 0.0033(11) 0.0007(12) 
C14 0.0307(15) 0.0348(16) 0.0285(15) 0.0049(12) 0.0050(12) -0.0011(13) 
C15 0.0352(17) 0.0356(17) 0.0368(17) 0.0016(13) 0.0073(13) 0.0036(13) 
C16 0.0470(19) 0.0286(16) 0.0398(18) 0.0062(13) 0.0074(14) 0.0030(14) 
C17 0.0422(18) 0.0342(17) 0.0348(16) 0.0042(13) 0.0118(14) -0.0042(14) 
C18 0.0325(16) 0.0335(16) 0.0286(15) 0.0004(12) 0.0069(12) -0.0010(12) 
C19 0.0280(14) 0.0280(15) 0.0267(14) 0.0004(11) 0.0020(11) 0.0019(11) 
C20 0.0320(15) 0.0300(15) 0.0275(15) 0.0016(11) 0.0015(12) 0.0024(12) 
C21 0.0349(16) 0.0295(16) 0.0412(18) 0.0036(13) 0.0054(13) -0.0003(13) 
C22 0.0289(16) 0.0339(17) 0.0488(19) -0.0033(14) -0.0029(14) 0.0007(13) 
C23 0.0362(17) 0.0398(18) 0.0357(17) -0.0019(14) -0.0090(13) 0.0044(14) 
C24 0.0344(16) 0.0362(17) 0.0294(15) 0.0041(12) -0.0001(12) 0.0027(13) 
C25 0.0280(14) 0.0288(15) 0.0258(14) 0.0020(11) 0.0009(11) -0.0051(11) 
C26 0.0328(16) 0.0318(16) 0.0307(15) 0.0007(12) -0.0017(12) -0.0018(12) 
C27 0.0428(18) 0.0417(18) 0.0270(15) -0.0058(13) 0.0025(13) -0.0057(14) 
C28 0.0416(18) 0.0421(18) 0.0255(15) 0.0022(13) -0.0069(13) -0.0116(14) 
C29 0.0320(16) 0.0385(17) 0.0338(16) 0.0051(13) -0.0055(13) -0.0022(13) 
C30 0.0313(16) 0.0355(17) 0.0303(15) 0.0029(12) -0.0014(12) -0.0002(13) 
C31 0.0318(15) 0.0365(16) 0.0226(14) 0.0066(12) 0.0058(11) 0.0075(12) 
C32 0.0436(18) 0.0331(16) 0.0302(16) 0.0041(13) 0.0068(13) 0.0024(14) 
C33 0.063(2) 0.0374(19) 0.0362(18) 0.0000(14) 0.0127(16) 0.0122(17) 
C34 0.053(2) 0.050(2) 0.0348(17) 0.0101(15) 0.0163(15) 0.0186(17) 
C35 0.0318(17) 0.058(2) 0.0382(18) 0.0093(16) 0.0077(14) 0.0090(15) 
C36 0.0326(16) 0.048(2) 0.0316(16) 0.0021(14) 0.0026(13) 0.0049(14) 
C37 0.0320(15) 0.0312(15) 0.0235(14) 0.0048(11) 0.0021(11) 0.0072(12) 
C38 0.0336(16) 0.0358(17) 0.0267(15) 0.0045(12) 0.0034(12) 0.0042(13) 
C39 0.0316(16) 0.047(2) 0.0358(17) 0.0044(14) 0.0034(13) 0.0084(14) 
C40 0.0433(19) 0.0441(19) 0.0360(17) 0.0039(14) 0.0047(14) 0.0197(15) 
C41 0.055(2) 0.0333(17) 0.0335(17) -0.0016(13) 0.0037(15) 0.0108(15) 
C42 0.0340(16) 0.0372(17) 0.0283(15) 0.0013(12) -0.0002(12) 0.0051(13) 
C43 0.0303(15) 0.0409(17) 0.0221(14) 0.0070(12) 0.0025(11) 0.0040(13) 
C44 0.0452(19) 0.0401(18) 0.0324(17) 0.0042(13) 0.0048(14) -0.0022(15) 
C45 0.058(2) 0.045(2) 0.0393(19) 0.0106(15) 0.0056(16) -0.0093(17) 
C46 0.047(2) 0.063(2) 0.0373(19) 0.0166(17) 0.0086(15) -0.0026(18) 
C47 0.052(2) 0.058(2) 0.0403(19) 0.0116(16) 0.0205(16) 0.0113(18) 
C48 0.0414(18) 0.0430(19) 0.0380(18) 0.0077(14) 0.0111(14) 0.0075(15) 
C49 0.0290(14) 0.0279(14) 0.0234(14) 0.0023(11) -0.0012(11) 0.0013(11) 
C50 0.0283(15) 0.0475(19) 0.0295(16) 0.0089(13) 0.0033(12) -0.0001(13) 
C51 0.0281(16) 0.062(2) 0.0378(18) 0.0109(16) -0.0024(13) 0.0011(15) 
C52 0.0396(18) 0.0460(19) 0.0289(16) 0.0076(14) -0.0065(13) 0.0027(15) 
C53 0.0443(18) 0.0358(17) 0.0234(15) 0.0047(12) 0.0006(13) 0.0058(14) 
C54 0.0290(14) 0.0312(15) 0.0260(14) 0.0024(11) 0.0041(11) 0.0033(12) 
C55 0.0276(14) 0.0308(15) 0.0269(14) -0.0020(11) 0.0034(11) 0.0002(12) 
C56 0.0409(17) 0.0331(16) 0.0278(15) -0.0004(12) 0.0020(13) 0.0026(13) 
C57 0.055(2) 0.0333(17) 0.0350(17) 0.0006(13) 0.0079(15) -0.0005(15) 
C58 0.0455(19) 0.0326(17) 0.0416(18) -0.0058(14) 0.0092(15) -0.0038(14) 
C59 0.0386(17) 0.0431(19) 0.0290(15) -0.0094(13) -0.0005(13) 0.0014(14) 
C60 0.0342(16) 0.0360(16) 0.0265(15) 0.0000(12) 0.0037(12) 0.0070(13) 
  
_geom_special_details 
; 
 All esds (except the esd in the dihedral angle between two l.s. planes) 
 are estimated using the full covariance matrix.  The cell esds are taken 
 into account individually in the estimation of esds in distances, angles 
 and torsion angles; correlations between esds in cell parameters are only 
 used when they are defined by crystal symmetry.  An approximate (isotropic) 
 treatment of cell esds is used for estimating esds involving l.s. planes. 
; 
  
loop_ 
 _geom_bond_atom_site_label_1 
 _geom_bond_atom_site_label_2 
 _geom_bond_distance 
 _geom_bond_site_symmetry_2 
 _geom_bond_publ_flag 
Co1 O1 1.962(2) . ? 
Co1 O2 1.969(2) . ? 
Co1 Cl1 2.2782(8) . ? 
Co1 Cl2 2.2845(8) . ? 
P1 C19 1.789(3) . ? 
P1 C13 1.791(3) . ? 
P1 C25 1.795(3) . ? 
P1 C31 1.808(3) . ? 
P2 C55 1.789(3) . ? 
P2 C49 1.796(3) . ? 
P2 C37 1.797(3) . ? 
P2 C43 1.797(3) . ? 
O1 C1 1.308(3) . ? 
O2 C7 1.280(4) . ? 
F1 C2 1.344(4) . ? 
F2 C3 1.349(3) . ? 
F3 C4 1.355(3) . ? 
F4 C5 1.351(4) . ? 
F5 C6 1.355(3) . ? 
F6 C8 1.358(4) . ? 
F7 C9 1.341(4) . ? 
F8 C10 1.355(4) . ? 
F9 C11 1.335(4) . ? 
F10 C12 1.349(4) . ? 
C1 C6 1.389(4) . ? 
C1 C2 1.404(4) . ? 
C2 C3 1.375(4) . ? 
C3 C4 1.370(5) . ? 
C4 C5 1.365(4) . ? 
C5 C6 1.379(4) . ? 
C7 C8 1.401(5) . ? 
C7 C12 1.408(5) . ? 
C8 C9 1.385(5) . ? 
C9 C10 1.359(5) . ? 
C10 C11 1.380(5) . ? 
C11 C12 1.378(5) . ? 
C13 C14 1.390(4) . ? 
C13 C18 1.399(4) . ? 
C14 C15 1.381(4) . ? 
C15 C16 1.388(4) . ? 
C16 C17 1.378(5) . ? 
C17 C18 1.385(4) . ? 
C19 C20 1.393(4) . ? 
C19 C24 1.407(4) . ? 
C20 C21 1.385(4) . ? 
C21 C22 1.380(5) . ? 
C22 C23 1.389(5) . ? 
C23 C24 1.374(4) . ? 
C25 C26 1.392(4) . ? 
C25 C30 1.395(4) . ? 
C26 C27 1.391(4) . ? 
C27 C28 1.382(5) . ? 
C28 C29 1.387(5) . ? 
C29 C30 1.381(4) . ? 
C31 C32 1.386(4) . ? 
C31 C36 1.402(4) . ? 
C32 C33 1.393(4) . ? 
C33 C34 1.379(5) . ? 
C34 C35 1.385(5) . ? 
C35 C36 1.383(4) . ? 
C37 C42 1.394(4) . ? 
C37 C38 1.395(4) . ? 
C38 C39 1.379(4) . ? 
C39 C40 1.384(5) . ? 
C40 C41 1.383(5) . ? 
C41 C42 1.386(4) . ? 
C43 C48 1.378(4) . ? 
C43 C44 1.403(5) . ? 
C44 C45 1.381(5) . ? 
C45 C46 1.381(5) . ? 
C46 C47 1.384(5) . ? 
C47 C48 1.395(5) . ? 
C49 C50 1.387(4) . ? 
C49 C54 1.396(4) . ? 
C50 C51 1.392(4) . ? 
C51 C52 1.379(5) . ? 
C52 C53 1.377(5) . ? 
C53 C54 1.387(4) . ? 
C55 C60 1.403(4) . ? 
C55 C56 1.405(4) . ? 
C56 C57 1.388(5) . ? 
C57 C58 1.386(5) . ? 
C58 C59 1.396(5) . ? 
C59 C60 1.384(4) . ? 
  
loop_ 
 _geom_angle_atom_site_label_1 
 _geom_angle_atom_site_label_2 
 _geom_angle_atom_site_label_3 
 _geom_angle 
 _geom_angle_site_symmetry_1 
 _geom_angle_site_symmetry_3 
 _geom_angle_publ_flag 
O1 Co1 O2 99.69(9) . . ? 
O1 Co1 Cl1 104.28(6) . . ? 
O2 Co1 Cl1 114.65(7) . . ? 
O1 Co1 Cl2 117.12(8) . . ? 
O2 Co1 Cl2 109.12(7) . . ? 
Cl1 Co1 Cl2 111.62(3) . . ? 
C19 P1 C13 108.43(13) . . ? 
C19 P1 C25 108.25(13) . . ? 
C13 P1 C25 110.29(13) . . ? 
C19 P1 C31 108.57(14) . . ? 
C13 P1 C31 111.58(13) . . ? 
C25 P1 C31 109.63(13) . . ? 
C55 P2 C49 108.49(14) . . ? 
C55 P2 C37 111.19(14) . . ? 
C49 P2 C37 109.03(13) . . ? 
C55 P2 C43 110.82(14) . . ? 
C49 P2 C43 108.22(14) . . ? 
C37 P2 C43 109.02(14) . . ? 
C1 O1 Co1 120.66(18) . . ? 
C7 O2 Co1 131.30(19) . . ? 
O1 C1 C6 122.2(3) . . ? 
O1 C1 C2 123.4(3) . . ? 
C6 C1 C2 114.5(3) . . ? 
F1 C2 C3 118.9(3) . . ? 
F1 C2 C1 118.3(3) . . ? 
C3 C2 C1 122.8(3) . . ? 
F2 C3 C4 119.5(3) . . ? 
F2 C3 C2 120.0(3) . . ? 
C4 C3 C2 120.5(3) . . ? 
F3 C4 C5 120.3(3) . . ? 
F3 C4 C3 121.1(3) . . ? 
C5 C4 C3 118.7(3) . . ? 
F4 C5 C4 119.2(3) . . ? 
F4 C5 C6 120.1(3) . . ? 
C4 C5 C6 120.7(3) . . ? 
F5 C6 C5 117.6(3) . . ? 
F5 C6 C1 119.5(3) . . ? 
C5 C6 C1 122.9(3) . . ? 
O2 C7 C8 122.9(3) . . ? 
O2 C7 C12 124.1(3) . . ? 
C8 C7 C12 112.9(3) . . ? 
F6 C8 C9 117.3(3) . . ? 
F6 C8 C7 118.8(3) . . ? 
C9 C8 C7 123.9(3) . . ? 
F7 C9 C10 120.3(3) . . ? 
F7 C9 C8 119.5(3) . . ? 
C10 C9 C8 120.2(3) . . ? 
F8 C10 C9 121.1(3) . . ? 
F8 C10 C11 119.5(3) . . ? 
C9 C10 C11 119.4(3) . . ? 
F9 C11 C12 119.4(3) . . ? 
F9 C11 C10 121.2(3) . . ? 
C12 C11 C10 119.4(3) . . ? 
F10 C12 C11 117.3(3) . . ? 
F10 C12 C7 118.4(3) . . ? 
C11 C12 C7 124.2(3) . . ? 
C14 C13 C18 120.1(3) . . ? 
C14 C13 P1 118.1(2) . . ? 
C18 C13 P1 121.6(2) . . ? 
C15 C14 C13 119.9(3) . . ? 
C14 C15 C16 119.8(3) . . ? 
C17 C16 C15 120.7(3) . . ? 
C16 C17 C18 120.1(3) . . ? 
C17 C18 C13 119.5(3) . . ? 
C20 C19 C24 120.3(3) . . ? 
C20 C19 P1 121.2(2) . . ? 
C24 C19 P1 118.3(2) . . ? 
C21 C20 C19 119.2(3) . . ? 
C22 C21 C20 120.3(3) . . ? 
C21 C22 C23 120.7(3) . . ? 
C24 C23 C22 119.9(3) . . ? 
C23 C24 C19 119.6(3) . . ? 
C26 C25 C30 120.0(3) . . ? 
C26 C25 P1 119.2(2) . . ? 
C30 C25 P1 120.5(2) . . ? 
C27 C26 C25 119.5(3) . . ? 
C28 C27 C26 120.1(3) . . ? 
C27 C28 C29 120.5(3) . . ? 
C30 C29 C28 119.7(3) . . ? 
C29 C30 C25 120.2(3) . . ? 
C32 C31 C36 119.7(3) . . ? 
C32 C31 P1 120.4(2) . . ? 
C36 C31 P1 119.8(2) . . ? 
C31 C32 C33 119.9(3) . . ? 
C34 C33 C32 120.2(3) . . ? 
C33 C34 C35 120.1(3) . . ? 
C36 C35 C34 120.4(3) . . ? 
C35 C36 C31 119.7(3) . . ? 
C42 C37 C38 119.9(3) . . ? 
C42 C37 P2 118.8(2) . . ? 
C38 C37 P2 121.1(2) . . ? 
C39 C38 C37 119.7(3) . . ? 
C38 C39 C40 120.5(3) . . ? 
C41 C40 C39 119.9(3) . . ? 
C40 C41 C42 120.4(3) . . ? 
C41 C42 C37 119.6(3) . . ? 
C48 C43 C44 119.6(3) . . ? 
C48 C43 P2 119.9(2) . . ? 
C44 C43 P2 120.1(2) . . ? 
C45 C44 C43 120.3(3) . . ? 
C44 C45 C46 119.8(3) . . ? 
C45 C46 C47 120.3(3) . . ? 
C46 C47 C48 120.2(3) . . ? 
C43 C48 C47 119.8(3) . . ? 
C50 C49 C54 120.4(3) . . ? 
C50 C49 P2 119.8(2) . . ? 
C54 C49 P2 119.7(2) . . ? 
C49 C50 C51 119.5(3) . . ? 
C52 C51 C50 120.1(3) . . ? 
C53 C52 C51 120.2(3) . . ? 
C52 C53 C54 120.7(3) . . ? 
C53 C54 C49 119.1(3) . . ? 
C60 C55 C56 119.4(3) . . ? 
C60 C55 P2 120.0(2) . . ? 
C56 C55 P2 120.5(2) . . ? 
C57 C56 C55 119.9(3) . . ? 
C58 C57 C56 120.1(3) . . ? 
C57 C58 C59 120.7(3) . . ? 
C60 C59 C58 119.5(3) . . ? 
C59 C60 C55 120.5(3) . . ? 
  
_diffrn_measured_fraction_theta_max    0.947 
_diffrn_reflns_theta_full              28.30 
_diffrn_measured_fraction_theta_full   0.947 
_refine_diff_density_max    1.394 
_refine_diff_density_min   -0.428 
_refine_diff_density_rms    0.080
#===END
data_Compound7b 
  
_audit_creation_method            SHELXL-97 
# 1. SUBMISSION DETAILS                                                         
_publ_contact_author_name                       'Linda H. Doerrer'              
_publ_contact_author_address                                                    
;                                                                               
Barnard College, Chemistry Department                                           
3009 Broadway                                                                   
New York, NY, 10027                                                             
;                                                                               
_publ_contact_author_phone                      ' 212-854-2074 '                
_publ_contact_author_fax                        ' 212-854-2310 '                
_publ_contact_author_email        ' ldoerrer@barnard.edu '                      
_publ_requested_journal                         'Inorganic Chemistry'           
_publ_requested_coeditor_name                   ' Prof James Mayer '            
#============================================================================== 
# 3. TITLE AND AUTHOR LIST                                                      
_publ_section_title                                                             
;                                                                               
Homoleptic Cobalt and Copper Phenolate A2[M(OAr)4] Compounds
The Effect of Phenoxide Fluorination
;                                                                               
# The loop structure below should contain the names and addresses of all        
# authors, in the required order of publication. Repeat as necessary.           
loop_                                                                           
        _publ_author_name                                                       
        _publ_author_address                                                    
        _publ_author_footnote                                                   
'Buzzeo, Marisa C.'                               #<--'Last name, first name'   
;                                                                               
Barnard College, Chemistry Department                                           
3009 Broadway                                                                   
New York, NY, 10027                                                             
;                                                                               
'Iqbal, Amber H.'                                                               
;                                                                               
Barnard College, Chemistry Department                                           
3009 Broadway                                                                   
New York, NY, 10027                                                             
;                                                                               
'Long, Charli M.'                                                               
;                                                                               
Barnard College, Chemistry Department                                           
3009 Broadway                                                                   
New York, NY, 10027                                                             
;                                                                               
'Millar, David'                                                                 
;                                                                               
Barnard College, Chemistry Department                                           
3009 Broadway                                                                   
New York, NY, 10027                                                             
;                                                                               
'Patel, Sonal'                                                                  
;                                                                               
Barnard College, Chemistry Department                                           
3009 Broadway                                                                   
New York, NY, 10027                                                             
;                                                                               
'Pellow, Matthew A.'                                                            
;                                                                               
Barnard College, Chemistry Department                                           
3009 Broadway                                                                   
New York, NY, 10027                                                             
;                                                                               
'Saddoughi, Sahar A.'                                                           
;                                                                               
Barnard College, Chemistry Department                                           
3009 Broadway                                                                   
New York, NY, 10027                                                             
;                                                                               
'Smenton, Abigail L.'                                                           
;                                                                               
Barnard College, Chemistry Department                                           
3009 Broadway                                                                   
New York, NY, 10027                                                             
;                                                                               
'Turner, John F. C.'                                                            
;                                                                               
Department of Chemistry                                                         
408 Buehler Hall                                                                
University of Tennessee                                                         
Knoxville, TN 37996                                                             
;                                                                               
'Wadhawan, Jay D.'                                                              
;                                                                               
Physical and Theoretical Chemistry Laboratory                                   
University of Oxford                                                            
OXFORD OX1 3QZ, UK                                                              
;                                                                               
'Compton, Richard G.'
;                                                                          
Physical and Theoretical Chemistry Laboratory                                   
University of Oxford                                                            
OXFORD OX1 3QZ, UK                                                              
;                                                                               
'Golen, James A.'                                                               
;                                                                               
Department of Chemistry and Biochemistry                                        
MC 0358                                                                         
University of California, San Diego                                             
9500 Gilman Drive                                                               
La Jolla, CA 92093                                                              
;
;                                                                               
permanent address is the Department of Chemistry & Biochemistry, University of  
Massachusetts Dartmouth, North Dartmouth MA 02747                               
;                                                                               
'Rheingold, Arnold L.'                                                          
;                                                                               
Department of Chemistry and Biochemistry                                        
MC 0358                                                                         
University of California, San Diego                                             
9500 Gilman Drive                                                               
La Jolla, CA 92093                                                              
;                                                                               
#============================================================================== 
_chemical_name_systematic 
; 
 ? 
; 
_chemical_name_common             ? 
_chemical_melting_point           ? 
_chemical_formula_moiety          ? 
_chemical_formula_sum 
 'C56 H60 Co F24 K2 O16' 
_chemical_formula_weight          1582.17 
  
loop_ 
 _atom_type_symbol 
 _atom_type_description 
 _atom_type_scat_dispersion_real 
 _atom_type_scat_dispersion_imag 
 _atom_type_scat_source 
 'C'  'C'   0.0033   0.0016 
 'International Tables Vol C Tables 4.2.6.8 and 6.1.1.4' 
 'H'  'H'   0.0000   0.0000 
 'International Tables Vol C Tables 4.2.6.8 and 6.1.1.4' 
 'O'  'O'   0.0106   0.0060 
 'International Tables Vol C Tables 4.2.6.8 and 6.1.1.4' 
 'K'  'K'   0.2009   0.2494 
 'International Tables Vol C Tables 4.2.6.8 and 6.1.1.4' 
 'Co'  'Co'   0.3494   0.9721 
 'International Tables Vol C Tables 4.2.6.8 and 6.1.1.4' 
 'F'  'F'   0.0171   0.0103 
 'International Tables Vol C Tables 4.2.6.8 and 6.1.1.4' 
  
_symmetry_cell_setting            Monoclinic 
_symmetry_space_group_name_H-M    C2/c 
  
loop_ 
 _symmetry_equiv_pos_as_xyz 
 'x, y, z' 
 '-x, y, -z+1/2' 
 'x+1/2, y+1/2, z' 
 '-x+1/2, y+1/2, -z+1/2' 
 '-x, -y, -z' 
 'x, -y, z-1/2' 
 '-x+1/2, -y+1/2, -z' 
 'x+1/2, -y+1/2, z-1/2' 
  
_cell_length_a                    23.3983(13) 
_cell_length_b                    12.7964(6) 
_cell_length_c                    24.0070(13) 
_cell_angle_alpha                 90.00 
_cell_angle_beta                  109.109(2) 
_cell_angle_gamma                 90.00 
_cell_volume                      6792.0(6) 
_cell_formula_units_Z             4 
_cell_measurement_temperature     150(2) 
_cell_measurement_reflns_used     9816 
_cell_measurement_theta_min       2.17 
_cell_measurement_theta_max       28.21 
  
_exptl_crystal_description        Block 
_exptl_crystal_colour             Blue 
_exptl_crystal_size_max           0.35 
_exptl_crystal_size_mid           0.30 
_exptl_crystal_size_min           0.25 
_exptl_crystal_density_meas       0 
_exptl_crystal_density_diffrn     1.547 
_exptl_crystal_density_method     'not measured' 
_exptl_crystal_F_000              3220 
_exptl_absorpt_coefficient_mu     0.503 
_exptl_absorpt_correction_type    'Multi-scan' 
_exptl_absorpt_correction_T_min   0.864
_exptl_absorpt_correction_T_max   1.000 
_exptl_absorpt_process_details    SADABS
  
_exptl_special_details 
; 
 ? 
; 
  
_diffrn_ambient_temperature       150(2) 
_diffrn_radiation_wavelength      0.71073 
_diffrn_radiation_type            MoK\a 
_diffrn_radiation_source          'fine-focus sealed tube' 
_diffrn_radiation_monochromator   graphite 
_diffrn_measurement_device_type   'CCD area detector' 
_diffrn_measurement_method        'phi and omega scans' 
_diffrn_detector_area_resol_mean  ? 
_diffrn_standards_number          ? 
_diffrn_standards_interval_count  ? 
_diffrn_standards_interval_time   ? 
_diffrn_standards_decay_%         ? 
_diffrn_reflns_number             21302 
_diffrn_reflns_av_R_equivalents   0.0288 
_diffrn_reflns_av_sigmaI/netI     0.0361 
_diffrn_reflns_limit_h_min        -20 
_diffrn_reflns_limit_h_max        31 
_diffrn_reflns_limit_k_min        -17 
_diffrn_reflns_limit_k_max        16 
_diffrn_reflns_limit_l_min        -30 
_diffrn_reflns_limit_l_max        29 
_diffrn_reflns_theta_min          2.17 
_diffrn_reflns_theta_max          28.31 
_reflns_number_total              7978 
_reflns_number_gt                 6377 
_reflns_threshold_expression      >2sigma(I) 
  
_computing_data_collection        'Bruker SMART' 
_computing_cell_refinement        'Bruker SMART' 
_computing_data_reduction         'Bruker SAINT' 
_computing_structure_solution     'SHELXS-97 (Sheldrick, 1990)' 
_computing_structure_refinement   'SHELXL-97 (Sheldrick, 1997)' 
_computing_molecular_graphics     'Bruker SHELXTL' 
_computing_publication_material   'Bruker SHELXTL' 
  
_refine_special_details 
; 
 Refinement of F^2^ against ALL reflections.  The weighted R-factor wR and 
 goodness of fit S are based on F^2^, conventional R-factors R are based 
 on F, with F set to zero for negative F^2^. The threshold expression of 
 F^2^ > 2sigma(F^2^) is used only for calculating R-factors(gt) etc. and is 
 not relevant to the choice of reflections for refinement.  R-factors based 
 on F^2^ are statistically about twice as large as those based on F, and R- 
 factors based on ALL data will be even larger. 
; 
  
_refine_ls_structure_factor_coef  Fsqd 
_refine_ls_matrix_type            full 
_refine_ls_weighting_scheme       calc 
_refine_ls_weighting_details 
 'calc w=1/[\s^2^(Fo^2^)+(0.1049P)^2^+41.7239P] where P=(Fo^2^+2Fc^2^)/3' 
_atom_sites_solution_primary      direct 
_atom_sites_solution_secondary    difmap 
_atom_sites_solution_hydrogens    geom 
_refine_ls_hydrogen_treatment     mixed 
_refine_ls_extinction_method      none 
_refine_ls_extinction_coef        ? 
_refine_ls_number_reflns          7978 
_refine_ls_number_parameters      450 
_refine_ls_number_restraints      0 
_refine_ls_R_factor_all           0.0995 
_refine_ls_R_factor_gt            0.0836 
_refine_ls_wR_factor_ref          0.2250 
_refine_ls_wR_factor_gt           0.2121 
_refine_ls_goodness_of_fit_ref    1.026 
_refine_ls_restrained_S_all       1.026 
_refine_ls_shift/su_max           0.011 
_refine_ls_shift/su_mean          0.000 
  
loop_ 
 _atom_site_label 
 _atom_site_type_symbol 
 _atom_site_fract_x 
 _atom_site_fract_y 
 _atom_site_fract_z 
 _atom_site_U_iso_or_equiv 
 _atom_site_adp_type 
 _atom_site_occupancy 
 _atom_site_symmetry_multiplicity 
 _atom_site_calc_flag 
 _atom_site_refinement_flags 
 _atom_site_disorder_assembly 
 _atom_site_disorder_group 
Co1 Co 0.0000 0.10668(5) 0.2500 0.02488(19) Uani 1 2 d S . . 
K1 K -0.08492(4) 0.17689(7) 0.10024(3) 0.0312(2) Uani 1 1 d . . . 
O1 O -0.06350(13) 0.0287(2) 0.19198(11) 0.0341(6) Uani 1 1 d . . . 
O2 O 0.02161(12) 0.1934(2) 0.19360(12) 0.0342(6) Uani 1 1 d . . . 
O3 O -0.11871(14) 0.2950(2) 0.17938(13) 0.0415(7) Uani 1 1 d . . . 
O4 O -0.21201(14) 0.1933(2) 0.09254(13) 0.0405(7) Uani 1 1 d . . . 
O5 O -0.17579(14) 0.0506(2) 0.02033(13) 0.0419(7) Uani 1 1 d . . . 
O6 O -0.06141(16) 0.0684(3) 0.00453(14) 0.0506(8) Uani 1 1 d . . . 
O7 O -0.06077(16) 0.2888(3) 0.00585(15) 0.0513(8) Uani 1 1 d . . . 
O8 O -0.06416(16) 0.3995(2) 0.10486(15) 0.0480(8) Uani 1 1 d . . . 
C1 C -0.08353(17) -0.0665(3) 0.19319(16) 0.0279(7) Uani 1 1 d . . . 
C2 C -0.06999(18) -0.1274(3) 0.24432(16) 0.0297(8) Uani 1 1 d . . . 
H2A H -0.0456 -0.0989 0.2809 0.036 Uiso 1 1 calc R . . 
C3 C -0.09150(19) -0.2283(3) 0.24235(17) 0.0330(8) Uani 1 1 d . . . 
C4 C -0.12734(19) -0.2739(3) 0.18987(18) 0.0352(9) Uani 1 1 d . . . 
H4A H -0.1421 -0.3433 0.1888 0.042 Uiso 1 1 calc R . . 
C5 C -0.14049(18) -0.2139(3) 0.13964(17) 0.0328(8) Uani 1 1 d . . . 
C6 C -0.12012(17) -0.1127(3) 0.14024(16) 0.0300(8) Uani 1 1 d . . . 
H6A H -0.1308 -0.0738 0.1046 0.036 Uiso 1 1 calc R . . 
C7 C -0.0760(3) -0.2911(4) 0.2982(2) 0.0478(11) Uani 1 1 d . . . 
C8 C -0.1769(2) -0.2586(4) 0.0810(2) 0.0461(11) Uani 1 1 d . . . 
C9 C 0.07325(17) 0.1986(3) 0.18374(16) 0.0298(8) Uani 1 1 d . . . 
C10 C 0.11671(18) 0.1179(3) 0.19965(17) 0.0329(8) Uani 1 1 d . . . 
H10A H 0.1088 0.0567 0.2184 0.039 Uiso 1 1 calc R . . 
C11 C 0.1708(2) 0.1272(3) 0.18814(19) 0.0380(9) Uani 1 1 d . . . 
C12 C 0.1845(2) 0.2150(4) 0.16111(19) 0.0402(9) Uani 1 1 d . . . 
H12A H 0.2215 0.2202 0.1530 0.048 Uiso 1 1 calc R . . 
C13 C 0.1423(2) 0.2946(3) 0.14631(18) 0.0385(9) Uani 1 1 d . . . 
C14 C 0.08766(18) 0.2878(3) 0.15696(17) 0.0332(8) Uani 1 1 d . . . 
H14A H 0.0597 0.3440 0.1460 0.040 Uiso 1 1 calc R . . 
C15 C 0.2149(2) 0.0389(4) 0.2054(2) 0.0517(12) Uani 1 1 d . . . 
C16 C 0.1549(2) 0.3896(4) 0.1162(2) 0.0496(11) Uani 1 1 d . . . 
C17 C -0.1805(2) 0.3092(4) 0.1740(2) 0.0514(12) Uani 1 1 d . . . 
H17A H -0.1980 0.3675 0.1466 0.062 Uiso 1 1 calc R . . 
H17B H -0.1842 0.3262 0.2129 0.062 Uiso 1 1 calc R . . 
C18 C -0.2132(2) 0.2106(5) 0.1511(2) 0.0541(13) Uani 1 1 d . . . 
H18A H -0.1937 0.1514 0.1768 0.065 Uiso 1 1 calc R . . 
H18B H -0.2556 0.2157 0.1506 0.065 Uiso 1 1 calc R . . 
C19 C -0.2449(2) 0.1024(4) 0.0679(3) 0.0533(13) Uani 1 1 d . . . 
H19A H -0.2883 0.1130 0.0626 0.064 Uiso 1 1 calc R . . 
H19B H -0.2302 0.0427 0.0950 0.064 Uiso 1 1 calc R . . 
C20 C -0.2375(2) 0.0786(4) 0.0100(2) 0.0533(13) Uani 1 1 d . . . 
H20A H -0.2644 0.0202 -0.0094 0.064 Uiso 1 1 calc R . . 
H20B H -0.2482 0.1406 -0.0161 0.064 Uiso 1 1 calc R . . 
C21 C -0.1665(3) 0.0137(4) -0.0316(2) 0.0571(14) Uani 1 1 d . . . 
H21A H -0.1765 0.0692 -0.0621 0.068 Uiso 1 1 calc R . . 
H21B H -0.1929 -0.0473 -0.0474 0.068 Uiso 1 1 calc R . . 
C22 C -0.1015(3) -0.0170(4) -0.0164(2) 0.0577(14) Uani 1 1 d . . . 
H22A H -0.0922 -0.0722 0.0142 0.069 Uiso 1 1 calc R . . 
H22B H -0.0947 -0.0467 -0.0518 0.069 Uiso 1 1 calc R . . 
C23 C -0.0541(3) 0.1295(5) -0.0421(2) 0.0631(15) Uani 1 1 d . . . 
H23A H -0.0941 0.1453 -0.0713 0.076 Uiso 1 1 calc R . . 
H23B H -0.0300 0.0904 -0.0622 0.076 Uiso 1 1 calc R . . 
C24 C -0.0226(3) 0.2283(5) -0.0173(2) 0.0606(14) Uani 1 1 d . . . 
H24A H 0.0158 0.2124 0.0144 0.073 Uiso 1 1 calc R . . 
H24B H -0.0131 0.2681 -0.0485 0.073 Uiso 1 1 calc R . . 
C25 C -0.0402(2) 0.3942(4) 0.0170(2) 0.0540(13) Uani 1 1 d . . . 
H25A H -0.0455 0.4303 -0.0208 0.065 Uiso 1 1 calc R . . 
H25B H 0.0034 0.3949 0.0403 0.065 Uiso 1 1 calc R . . 
C26 C -0.0747(2) 0.4495(4) 0.0496(2) 0.0553(13) Uani 1 1 d . . . 
H26A H -0.0617 0.5234 0.0557 0.066 Uiso 1 1 calc R . . 
H26B H -0.1184 0.4478 0.0268 0.066 Uiso 1 1 calc R . . 
C27 C -0.0888(3) 0.4552(4) 0.1428(2) 0.0546(13) Uani 1 1 d . . . 
H27A H -0.1318 0.4722 0.1220 0.066 Uiso 1 1 calc R . . 
H27B H -0.0664 0.5214 0.1556 0.066 Uiso 1 1 calc R . . 
C28 C -0.0834(2) 0.3876(4) 0.1953(2) 0.0522(12) Uani 1 1 d . . . 
H28A H -0.0405 0.3683 0.2145 0.063 Uiso 1 1 calc R . . 
H28B H -0.0968 0.4276 0.2241 0.063 Uiso 1 1 calc R . . 
F1 F -0.1075(4) -0.2642(7) 0.3330(4) 0.063(2) Uiso 0.514(16) 1 d P . . 
F2 F -0.0164(3) -0.2769(6) 0.3337(3) 0.052(2) Uiso 0.514(16) 1 d P . . 
F3 F -0.0876(4) -0.3926(5) 0.2895(3) 0.054(2) Uiso 0.514(16) 1 d P . . 
F1A F -0.1225(5) -0.2924(9) 0.3203(5) 0.077(3) Uiso 0.486(16) 1 d P . . 
F2A F -0.0318(4) -0.2496(7) 0.3422(3) 0.059(2) Uiso 0.486(16) 1 d P . . 
F3A F -0.0589(5) -0.3906(5) 0.2919(3) 0.055(2) Uiso 0.486(16) 1 d P . . 
F4 F -0.1369(3) -0.3080(6) 0.0562(3) 0.058(2) Uiso 0.521(12) 1 d P . . 
F5 F -0.2039(3) -0.1924(5) 0.0415(3) 0.056(2) Uiso 0.521(12) 1 d P . . 
F6 F -0.2151(3) -0.3364(5) 0.0866(3) 0.0477(17) Uiso 0.521(12) 1 d P . . 
F4A F -0.1509(4) -0.2619(8) 0.0430(4) 0.071(3) Uiso 0.479(12) 1 d P . . 
F5A F -0.2272(3) -0.1948(5) 0.0555(3) 0.050(2) Uiso 0.479(12) 1 d P . . 
F6A F -0.1964(4) -0.3537(6) 0.0828(3) 0.0514(19) Uiso 0.479(12) 1 d P . . 
F7 F 0.1848(4) -0.0573(7) 0.1811(4) 0.0359(19) Uiso 0.33 1 d P . . 
F8 F 0.2391(4) 0.0258(7) 0.2595(3) 0.0416(17) Uiso 0.33 1 d P . . 
F9 F 0.2589(4) 0.0468(7) 0.1773(5) 0.0330(18) Uiso 0.33 1 d P . . 
F7A F 0.2151(4) -0.0102(6) 0.2581(3) 0.0354(15) Uiso 0.33 1 d P . . 
F8A F 0.2690(5) 0.0528(9) 0.2089(6) 0.067(3) Uiso 0.33 1 d P . . 
F9A F 0.1972(6) -0.0466(10) 0.1699(5) 0.063(3) Uiso 0.33 1 d P . . 
F7B F 0.2008(7) -0.0405(13) 0.2200(8) 0.103(4) Uiso 0.33 1 d P . . 
F8B F 0.2663(5) 0.0765(9) 0.2527(5) 0.067(3) Uiso 0.33 1 d P . . 
F9B F 0.2436(7) 0.0255(11) 0.1672(6) 0.074(4) Uiso 0.33 1 d P . . 
F10 F 0.2128(3) 0.4181(6) 0.1367(4) 0.059(2) Uiso 0.534(17) 1 d P . . 
F11 F 0.1215(4) 0.4760(5) 0.1215(4) 0.056(2) Uiso 0.534(17) 1 d P . . 
F12 F 0.1411(5) 0.3780(6) 0.0592(3) 0.062(2) Uiso 0.534(17) 1 d P . . 
F10A F 0.2129(4) 0.3891(8) 0.1143(5) 0.070(3) Uiso 0.466(17) 1 d P . . 
F11A F 0.1463(5) 0.4755(6) 0.1399(5) 0.062(3) Uiso 0.466(17) 1 d P . . 
F12A F 0.1206(5) 0.3891(7) 0.0571(4) 0.056(2) Uiso 0.466(17) 1 d P . . 
  
loop_ 
 _atom_site_aniso_label 
 _atom_site_aniso_U_11 
 _atom_site_aniso_U_22 
 _atom_site_aniso_U_33 
 _atom_site_aniso_U_23 
 _atom_site_aniso_U_13 
 _atom_site_aniso_U_12 
Co1 0.0295(4) 0.0216(3) 0.0200(3) 0.000 0.0032(3) 0.000 
K1 0.0327(4) 0.0319(4) 0.0245(4) 0.0037(3) 0.0032(3) -0.0031(3) 
O1 0.0430(16) 0.0258(13) 0.0250(12) 0.0000(10) -0.0007(11) -0.0076(11) 
O2 0.0248(13) 0.0399(15) 0.0342(14) 0.0127(12) 0.0048(11) 0.0003(11) 
O3 0.0447(17) 0.0396(16) 0.0348(15) -0.0002(12) 0.0058(13) 0.0058(13) 
O4 0.0398(16) 0.0427(17) 0.0356(15) 0.0064(13) 0.0077(13) -0.0064(13) 
O5 0.0416(16) 0.0424(17) 0.0334(15) 0.0006(13) 0.0010(13) -0.0074(13) 
O6 0.059(2) 0.060(2) 0.0344(16) -0.0012(15) 0.0183(15) -0.0055(17) 
O7 0.0497(19) 0.058(2) 0.0448(18) 0.0122(16) 0.0136(15) -0.0128(16) 
O8 0.0505(19) 0.0359(16) 0.0501(19) 0.0106(14) 0.0062(15) 0.0022(14) 
C1 0.0305(18) 0.0242(17) 0.0264(17) -0.0024(13) 0.0058(14) 0.0008(14) 
C2 0.0351(19) 0.0275(18) 0.0254(17) -0.0050(14) 0.0082(15) -0.0023(15) 
C3 0.042(2) 0.0300(19) 0.0282(18) 0.0009(15) 0.0125(16) -0.0021(16) 
C4 0.043(2) 0.0261(18) 0.039(2) -0.0041(15) 0.0166(18) -0.0082(16) 
C5 0.034(2) 0.0309(19) 0.0313(19) -0.0057(15) 0.0080(16) -0.0023(15) 
C6 0.0331(19) 0.0279(18) 0.0245(17) -0.0003(14) 0.0032(14) -0.0010(15) 
C7 0.075(3) 0.034(2) 0.038(2) 0.0023(18) 0.023(2) -0.007(2) 
C8 0.061(3) 0.037(2) 0.034(2) -0.0085(18) 0.008(2) -0.017(2) 
C9 0.0299(18) 0.0335(19) 0.0208(16) 0.0017(14) 0.0013(14) -0.0024(15) 
C10 0.037(2) 0.0307(19) 0.0292(18) 0.0022(15) 0.0084(16) -0.0010(16) 
C11 0.040(2) 0.040(2) 0.033(2) -0.0003(17) 0.0111(17) 0.0034(18) 
C12 0.036(2) 0.047(2) 0.038(2) -0.0003(18) 0.0145(18) -0.0038(18) 
C13 0.040(2) 0.042(2) 0.032(2) 0.0037(17) 0.0108(17) -0.0067(18) 
C14 0.035(2) 0.034(2) 0.0266(18) 0.0049(15) 0.0045(15) 0.0009(16) 
C15 0.051(3) 0.055(3) 0.054(3) 0.006(2) 0.024(2) 0.013(2) 
C16 0.049(3) 0.054(3) 0.051(3) 0.008(2) 0.023(2) -0.007(2) 
C17 0.051(3) 0.068(3) 0.034(2) 0.000(2) 0.013(2) 0.015(2) 
C18 0.046(3) 0.077(4) 0.041(2) 0.013(2) 0.017(2) -0.002(2) 
C19 0.035(2) 0.047(3) 0.074(4) 0.004(2) 0.013(2) -0.009(2) 
C20 0.040(3) 0.042(2) 0.058(3) -0.003(2) -0.011(2) -0.006(2) 
C21 0.071(4) 0.056(3) 0.037(2) -0.012(2) 0.008(2) -0.025(3) 
C22 0.083(4) 0.048(3) 0.046(3) -0.011(2) 0.026(3) -0.008(3) 
C23 0.073(4) 0.082(4) 0.038(3) -0.001(3) 0.024(3) -0.013(3) 
C24 0.063(3) 0.083(4) 0.044(3) 0.001(3) 0.027(3) -0.016(3) 
C25 0.047(3) 0.054(3) 0.054(3) 0.025(2) 0.007(2) -0.012(2) 
C26 0.048(3) 0.043(3) 0.063(3) 0.026(2) 0.004(2) -0.002(2) 
C27 0.058(3) 0.033(2) 0.064(3) -0.001(2) 0.008(3) 0.001(2) 
C28 0.056(3) 0.044(3) 0.043(2) -0.009(2) -0.002(2) 0.004(2) 
  
_geom_special_details 
; 
 All esds (except the esd in the dihedral angle between two l.s. planes) 
 are estimated using the full covariance matrix.  The cell esds are taken 
 into account individually in the estimation of esds in distances, angles 
 and torsion angles; correlations between esds in cell parameters are only 
 used when they are defined by crystal symmetry.  An approximate (isotropic) 
 treatment of cell esds is used for estimating esds involving l.s. planes. 
; 
  
loop_ 
 _geom_bond_atom_site_label_1 
 _geom_bond_atom_site_label_2 
 _geom_bond_distance 
 _geom_bond_site_symmetry_2 
 _geom_bond_publ_flag 
Co1 O2 1.941(3) 2 ? 
Co1 O2 1.941(3) . ? 
Co1 O1 1.947(3) . ? 
Co1 O1 1.947(3) 2 ? 
Co1 K1 3.6060(8) 2 ? 
Co1 K1 3.6060(8) . ? 
K1 O3 2.739(3) . ? 
K1 O2 2.761(3) . ? 
K1 O1 2.824(3) . ? 
K1 O5 2.854(3) . ? 
K1 O8 2.886(3) . ? 
K1 O6 2.888(3) . ? 
K1 O7 2.889(3) . ? 
K1 O4 2.926(3) . ? 
K1 C28 3.524(5) . ? 
O1 C1 1.309(4) . ? 
O2 C9 1.307(5) . ? 
O3 C17 1.421(6) . ? 
O3 C28 1.423(6) . ? 
O4 C19 1.413(6) . ? 
O4 C18 1.432(6) . ? 
O5 C21 1.415(6) . ? 
O5 C20 1.428(6) . ? 
O6 C22 1.420(6) . ? 
O6 C23 1.422(6) . ? 
O7 C24 1.424(7) . ? 
O7 C25 1.427(6) . ? 
O8 C26 1.419(6) . ? 
O8 C27 1.419(7) . ? 
C1 C2 1.400(5) . ? 
C1 C6 1.409(5) . ? 
C2 C3 1.381(5) . ? 
C3 C4 1.392(6) . ? 
C3 C7 1.501(6) . ? 
C4 C5 1.377(6) . ? 
C5 C6 1.378(5) . ? 
C5 C8 1.501(6) . ? 
C7 F2A 1.324(9) . ? 
C7 F1 1.328(9) . ? 
C7 F3 1.329(8) . ? 
C7 F3A 1.358(8) . ? 
C7 F1A 1.358(11) . ? 
C7 F2 1.389(9) . ? 
C8 F4A 1.253(9) . ? 
C8 F5 1.274(8) . ? 
C8 F6A 1.305(8) . ? 
C8 F6 1.374(8) . ? 
C8 F5A 1.397(9) . ? 
C8 F4 1.412(9) . ? 
C9 C14 1.404(5) . ? 
C9 C10 1.412(5) . ? 
C10 C11 1.386(6) . ? 
C11 C12 1.386(6) . ? 
C11 C15 1.494(7) . ? 
C12 C13 1.382(6) . ? 
C13 C14 1.386(6) . ? 
C13 C16 1.493(6) . ? 
C15 F7B 1.157(16) . ? 
C15 F8 1.247(9) . ? 
C15 F8A 1.254(12) . ? 
C15 F9B 1.315(15) . ? 
C15 F9A 1.366(13) . ? 
C15 F9 1.408(10) . ? 
C15 F7A 1.411(9) . ? 
C15 F8B 1.439(12) . ? 
C15 F7 1.444(11) . ? 
C16 F11A 1.284(9) . ? 
C16 F12 1.307(9) . ? 
C16 F10 1.332(8) . ? 
C16 F10A 1.371(10) . ? 
C16 F12A 1.383(10) . ? 
C16 F11 1.384(9) . ? 
C17 C18 1.485(8) . ? 
C19 C20 1.487(8) . ? 
C21 C22 1.498(8) . ? 
C23 C24 1.485(8) . ? 
C25 C26 1.477(8) . ? 
C27 C28 1.499(7) . ? 
F1 F1A 0.524(12) . ? 
F1 F2A 1.721(11) . ? 
F2 F2A 0.586(8) . ? 
F3 F3A 0.655(8) . ? 
F4 F4A 0.698(9) . ? 
F5 F5A 0.730(7) . ? 
F5 F4A 1.517(11) . ? 
F6 F6A 0.525(8) . ? 
F7 F7B 0.909(17) . ? 
F8 F7A 0.719(9) . ? 
F8 F8B 0.960(12) . ? 
F8 F7B 1.37(2) . ? 
F8 F8A 1.627(16) . ? 
F9 F8A 0.721(12) . ? 
F7A F7B 0.948(17) . ? 
F7A F8B 1.669(13) . ? 
F8A F9B 1.043(18) . ? 
F8A F8B 1.116(15) . ? 
F9A F7B 1.18(2) . ? 
F9A F9B 1.445(19) . ? 
F10 F10A 0.653(9) . ? 
F10 F11A 1.745(11) . ? 
F11 F11A 0.605(9) . ? 
F12 F10A 1.771(12) . ? 
  
loop_ 
 _geom_angle_atom_site_label_1 
 _geom_angle_atom_site_label_2 
 _geom_angle_atom_site_label_3 
 _geom_angle 
 _geom_angle_site_symmetry_1 
 _geom_angle_site_symmetry_3 
 _geom_angle_publ_flag 
O2 Co1 O2 110.27(18) 2 . ? 
O2 Co1 O1 118.69(12) 2 . ? 
O2 Co1 O1 96.10(12) . . ? 
O2 Co1 O1 96.10(12) 2 2 ? 
O2 Co1 O1 118.69(12) . 2 ? 
O1 Co1 O1 118.29(16) . 2 ? 
O2 Co1 K1 49.20(8) 2 2 ? 
O2 Co1 K1 111.63(9) . 2 ? 
O1 Co1 K1 152.07(8) . 2 ? 
O1 Co1 K1 51.10(8) 2 2 ? 
O2 Co1 K1 111.63(9) 2 . ? 
O2 Co1 K1 49.20(8) . . ? 
O1 Co1 K1 51.10(8) . . ? 
O1 Co1 K1 152.07(8) 2 . ? 
K1 Co1 K1 151.15(3) 2 . ? 
O3 K1 O2 77.50(9) . . ? 
O3 K1 O1 81.24(9) . . ? 
O2 K1 O1 62.35(8) . . ? 
O3 K1 O5 117.27(10) . . ? 
O2 K1 O5 149.90(9) . . ? 
O1 K1 O5 92.68(8) . . ? 
O3 K1 O8 60.77(10) . . ? 
O2 K1 O8 78.31(9) . . ? 
O1 K1 O8 130.42(9) . . ? 
O5 K1 O8 131.59(10) . . ? 
O3 K1 O6 172.19(10) . . ? 
O2 K1 O6 109.04(10) . . ? 
O1 K1 O6 105.43(9) . . ? 
O5 K1 O6 59.12(10) . . ? 
O8 K1 O6 115.59(11) . . ? 
O3 K1 O7 116.45(11) . . ? 
O2 K1 O7 104.03(9) . . ? 
O1 K1 O7 156.12(10) . . ? 
O5 K1 O7 92.72(10) . . ? 
O8 K1 O7 57.79(11) . . ? 
O6 K1 O7 58.47(11) . . ? 
O3 K1 O4 59.08(9) . . ? 
O2 K1 O4 132.42(9) . . ? 
O1 K1 O4 90.84(9) . . ? 
O5 K1 O4 58.66(9) . . ? 
O8 K1 O4 94.96(10) . . ? 
O6 K1 O4 116.01(10) . . ? 
O7 K1 O4 111.75(10) . . ? 
O3 K1 C28 22.01(12) . . ? 
O2 K1 C28 66.47(11) . . ? 
O1 K1 C28 92.71(10) . . ? 
O5 K1 C28 135.71(12) . . ? 
O8 K1 C28 41.77(12) . . ? 
O6 K1 C28 156.76(12) . . ? 
O7 K1 C28 99.53(12) . . ? 
O4 K1 C28 77.33(11) . . ? 
O3 K1 Co1 68.65(6) . . ? 
O2 K1 Co1 32.16(6) . . ? 
O1 K1 Co1 32.44(5) . . ? 
O5 K1 Co1 125.12(7) . . ? 
O8 K1 Co1 100.18(7) . . ? 
O6 K1 Co1 119.16(8) . . ? 
O7 K1 Co1 136.07(7) . . ? 
O4 K1 Co1 107.32(6) . . ? 
C28 K1 Co1 70.10(8) . . ? 
C1 O1 Co1 131.0(2) . . ? 
C1 O1 K1 132.0(2) . . ? 
Co1 O1 K1 96.46(10) . . ? 
C9 O2 Co1 128.5(2) . . ? 
C9 O2 K1 120.0(2) . . ? 
Co1 O2 K1 98.64(10) . . ? 
C17 O3 C28 113.8(4) . . ? 
C17 O3 K1 121.6(3) . . ? 
C28 O3 K1 111.8(3) . . ? 
C19 O4 C18 110.8(4) . . ? 
C19 O4 K1 111.7(3) . . ? 
C18 O4 K1 107.2(3) . . ? 
C21 O5 C20 111.6(4) . . ? 
C21 O5 K1 119.1(3) . . ? 
C20 O5 K1 117.6(3) . . ? 
C22 O6 C23 112.4(4) . . ? 
C22 O6 K1 112.1(3) . . ? 
C23 O6 K1 117.7(3) . . ? 
C24 O7 C25 111.8(4) . . ? 
C24 O7 K1 110.2(3) . . ? 
C25 O7 K1 117.5(3) . . ? 
C26 O8 C27 113.0(4) . . ? 
C26 O8 K1 115.7(3) . . ? 
C27 O8 K1 115.0(3) . . ? 
O1 C1 C2 123.9(3) . . ? 
O1 C1 C6 119.1(3) . . ? 
C2 C1 C6 117.0(3) . . ? 
C3 C2 C1 121.0(3) . . ? 
C2 C3 C4 121.8(4) . . ? 
C2 C3 C7 119.4(4) . . ? 
C4 C3 C7 118.8(4) . . ? 
C5 C4 C3 117.1(4) . . ? 
C4 C5 C6 122.5(4) . . ? 
C4 C5 C8 120.3(4) . . ? 
C6 C5 C8 117.1(4) . . ? 
C5 C6 C1 120.6(4) . . ? 
F2A C7 F1 81.0(6) . . ? 
F2A C7 F3 125.6(6) . . ? 
F1 C7 F3 103.0(6) . . ? 
F2A C7 F3A 106.5(6) . . ? 
F1 C7 F3A 123.9(6) . . ? 
F3 C7 F3A 28.2(3) . . ? 
F2A C7 F1A 102.0(6) . . ? 
F1 C7 F1A 22.5(5) . . ? 
F3 C7 F1A 84.3(6) . . ? 
F3A C7 F1A 109.6(6) . . ? 
F2A C7 F2 24.8(4) . . ? 
F1 C7 F2 103.5(6) . . ? 
F3 C7 F2 109.6(6) . . ? 
F3A C7 F2 85.3(5) . . ? 
F1A C7 F2 122.2(6) . . ? 
F2A C7 C3 113.3(5) . . ? 
F1 C7 C3 113.7(5) . . ? 
F3 C7 C3 114.0(5) . . ? 
F3A C7 C3 113.3(5) . . ? 
F1A C7 C3 111.5(6) . . ? 
F2 C7 C3 112.2(4) . . ? 
F4A C8 F5 73.7(6) . . ? 
F4A C8 F6A 104.5(6) . . ? 
F5 C8 F6A 123.5(6) . . ? 
F4A C8 F6 122.3(6) . . ? 
F5 C8 F6 112.1(5) . . ? 
F6A C8 F6 22.4(4) . . ? 
F4A C8 F5A 104.0(6) . . ? 
F5 C8 F5A 31.3(3) . . ? 
F6A C8 F5A 107.9(6) . . ? 
F6 C8 F5A 89.2(5) . . ? 
F4A C8 F4 29.6(4) . . ? 
F5 C8 F4 102.6(5) . . ? 
F6A C8 F4 83.3(5) . . ? 
F6 C8 F4 105.1(5) . . ? 
F5A C8 F4 131.0(5) . . ? 
F4A C8 C5 115.7(5) . . ? 
F5 C8 C5 115.8(4) . . ? 
F6A C8 C5 114.9(5) . . ? 
F6 C8 C5 111.8(4) . . ? 
F5A C8 C5 109.0(4) . . ? 
F4 C8 C5 108.3(5) . . ? 
O2 C9 C14 120.0(4) . . ? 
O2 C9 C10 122.7(3) . . ? 
C14 C9 C10 117.3(4) . . ? 
C11 C10 C9 120.5(4) . . ? 
C12 C11 C10 121.9(4) . . ? 
C12 C11 C15 119.9(4) . . ? 
C10 C11 C15 118.2(4) . . ? 
C13 C12 C11 117.6(4) . . ? 
C12 C13 C14 122.0(4) . . ? 
C12 C13 C16 119.2(4) . . ? 
C14 C13 C16 118.8(4) . . ? 
C13 C14 C9 120.6(4) . . ? 
F7B C15 F8 69.2(10) . . ? 
F7B C15 F8A 119.1(10) . . ? 
F8 C15 F8A 81.2(8) . . ? 
F7B C15 F9B 111.0(12) . . ? 
F8 C15 F9B 123.3(8) . . ? 
F8A C15 F9B 47.8(8) . . ? 
F7B C15 F9A 55.0(10) . . ? 
F8 C15 F9A 118.9(8) . . ? 
F8A C15 F9A 104.4(9) . . ? 
F9B C15 F9A 65.2(9) . . ? 
F7B C15 F9 122.3(10) . . ? 
F8 C15 F9 110.9(7) . . ? 
F8A C15 F9 30.8(6) . . ? 
F9B C15 F9 18.7(7) . . ? 
F9A C15 F9 83.0(8) . . ? 
F7B C15 F7A 41.9(9) . . ? 
F8 C15 F7A 30.6(4) . . ? 
F8A C15 F7A 107.3(8) . . ? 
F9B C15 F7A 135.7(8) . . ? 
F9A C15 F7A 96.5(7) . . ? 
F9 C15 F7A 132.4(6) . . ? 
F7B C15 F8B 107.7(11) . . ? 
F8 C15 F8B 41.1(5) . . ? 
F8A C15 F8B 48.4(7) . . ? 
F9B C15 F8B 96.2(8) . . ? 
F9A C15 F8B 139.9(8) . . ? 
F9 C15 F8B 78.5(7) . . ? 
F7A C15 F8B 71.7(6) . . ? 
F7B C15 F7 39.0(9) . . ? 
F8 C15 F7 107.5(7) . . ? 
F8A C15 F7 119.7(8) . . ? 
F9B C15 F7 84.3(8) . . ? 
F9A C15 F7 19.2(6) . . ? 
F9 C15 F7 101.7(7) . . ? 
F7A C15 F7 80.8(6) . . ? 
F8B C15 F7 140.8(7) . . ? 
F7B C15 C11 120.5(9) . . ? 
F8 C15 C11 115.3(5) . . ? 
F8A C15 C11 120.1(7) . . ? 
F9B C15 C11 111.7(7) . . ? 
F9A C15 C11 113.0(7) . . ? 
F9 C15 C11 111.1(5) . . ? 
F7A C15 C11 112.6(5) . . ? 
F8B C15 C11 106.8(6) . . ? 
F7 C15 C11 109.4(5) . . ? 
F11A C16 F12 122.7(7) . . ? 
F11A C16 F10 83.7(6) . . ? 
F12 C16 F10 106.9(6) . . ? 
F11A C16 F10A 108.6(7) . . ? 
F12 C16 F10A 82.7(6) . . ? 
F10 C16 F10A 27.9(4) . . ? 
F11A C16 F12A 109.6(7) . . ? 
F12 C16 F12A 20.7(4) . . ? 
F10 C16 F12A 124.1(6) . . ? 
F10A C16 F12A 102.5(6) . . ? 
F11A C16 F11 25.9(4) . . ? 
F12 C16 F11 103.5(6) . . ? 
F10 C16 F11 106.5(6) . . ? 
F10A C16 F11 127.0(6) . . ? 
F12A C16 F11 86.6(6) . . ? 
F11A C16 C13 113.4(5) . . ? 
F12 C16 C13 113.2(5) . . ? 
F10 C16 C13 112.5(5) . . ? 
F10A C16 C13 111.5(5) . . ? 
F12A C16 C13 110.7(5) . . ? 
F11 C16 C13 113.5(4) . . ? 
O3 C17 C18 108.1(4) . . ? 
O4 C18 C17 108.8(4) . . ? 
O4 C19 C20 110.2(4) . . ? 
O5 C20 C19 108.0(4) . . ? 
O5 C21 C22 108.0(4) . . ? 
O6 C22 C21 112.6(4) . . ? 
O6 C23 C24 108.9(4) . . ? 
O7 C24 C23 109.1(5) . . ? 
O7 C25 C26 110.0(4) . . ? 
O8 C26 C25 108.8(4) . . ? 
O8 C27 C28 108.0(4) . . ? 
O3 C28 C27 111.9(4) . . ? 
O3 C28 K1 46.2(2) . . ? 
C27 C28 K1 85.3(3) . . ? 
F1A F1 C7 82.0(17) . . ? 
F1A F1 F2A 127.8(19) . . ? 
C7 F1 F2A 49.4(4) . . ? 
F2A F2 C7 71.4(11) . . ? 
F3A F3 C7 78.3(10) . . ? 
F1 F1A C7 75.5(17) . . ? 
F2 F2A C7 83.8(12) . . ? 
F2 F2A F1 128.1(13) . . ? 
C7 F2A F1 49.6(4) . . ? 
F3 F3A C7 73.5(10) . . ? 
F4A F4 C8 62.5(10) . . ? 
F5A F5 C8 83.7(9) . . ? 
F5A F5 F4A 133.9(10) . . ? 
C8 F5 F4A 52.5(5) . . ? 
F6A F6 C8 71.4(12) . . ? 
F4 F4A C8 87.9(11) . . ? 
F4 F4A F5 139.8(13) . . ? 
C8 F4A F5 53.8(5) . . ? 
F5 F5A C8 65.0(8) . . ? 
F6 F6A C8 86.2(13) . . ? 
F7B F7 C15 53.2(11) . . ? 
F7A F8 F8B 167.6(16) . . ? 
F7A F8 C15 87.4(11) . . ? 
F8B F8 C15 80.2(9) . . ? 
F7A F8 F7B 40.8(10) . . ? 
F8B F8 F7B 128.4(13) . . ? 
C15 F8 F7B 52.3(8) . . ? 
F7A F8 F8A 128.3(12) . . ? 
F8B F8 F8A 42.0(8) . . ? 
C15 F8 F8A 49.6(6) . . ? 
F7B F8 F8A 87.5(9) . . ? 
F8A F9 C15 62.7(12) . . ? 
F8 F7A F7B 109.5(16) . . ? 
F8 F7A C15 62.0(9) . . ? 
F7B F7A C15 54.6(11) . . ? 
F8 F7A F8B 7.1(9) . . ? 
F7B F7A F8B 103.5(13) . . ? 
C15 F7A F8B 54.9(5) . . ? 
F9 F8A F9B 21.0(13) . . ? 
F9 F8A F8B 157.0(18) . . ? 
F9B F8A F8B 143.7(15) . . ? 
F9 F8A C15 86.5(14) . . ? 
F9B F8A C15 69.2(10) . . ? 
F8B F8A C15 74.5(10) . . ? 
F9 F8A F8 133.7(16) . . ? 
F9B F8A F8 113.4(13) . . ? 
F8B F8A F8 35.1(7) . . ? 
C15 F8A F8 49.3(6) . . ? 
F7B F9A C15 53.5(10) . . ? 
F7B F9A F9B 101.5(14) . . ? 
C15 F9A F9B 55.7(8) . . ? 
F7 F7B F7A 169(2) . . ? 
F7 F7B C15 87.8(15) . . ? 
F7A F7B C15 83.5(14) . . ? 
F7 F7B F9A 21.8(10) . . ? 
F7A F7B F9A 154(2) . . ? 
C15 F7B F9A 71.6(11) . . ? 
F7 F7B F8 144.6(19) . . ? 
F7A F7B F8 29.7(8) . . ? 
C15 F7B F8 58.5(9) . . ? 
F9A F7B F8 124.2(15) . . ? 
F8 F8B F8A 102.9(13) . . ? 
F8 F8B C15 58.7(8) . . ? 
F8A F8B C15 57.1(8) . . ? 
F8 F8B F7A 5.3(7) . . ? 
F8A F8B F7A 99.0(10) . . ? 
C15 F8B F7A 53.4(5) . . ? 
F8A F9B C15 63.0(10) . . ? 
F8A F9B F9A 111.8(15) . . ? 
C15 F9B F9A 59.1(8) . . ? 
F10A F10 C16 79.4(11) . . ? 
F10A F10 F11A 121.2(13) . . ? 
C16 F10 F11A 47.0(4) . . ? 
F11A F11 C16 67.8(11) . . ? 
C16 F12 F10A 50.2(5) . . ? 
F10 F10A C16 72.7(12) . . ? 
F10 F10A F12 113.8(13) . . ? 
C16 F10A F12 47.1(4) . . ? 
F11 F11A C16 86.3(13) . . ? 
F11 F11A F10 129.0(14) . . ? 
C16 F11A F10 49.3(4) . . ? 
  
_diffrn_measured_fraction_theta_max    0.944 
_diffrn_reflns_theta_full              28.31 
_diffrn_measured_fraction_theta_full   0.944 
_refine_diff_density_max    1.462 
_refine_diff_density_min   -0.834 
_refine_diff_density_rms    0.100
#===END 
data_Compound3 
  
_audit_creation_method            SHELXL-97 
# 1. SUBMISSION DETAILS                                                         
_publ_contact_author_name                       'Linda H. Doerrer'              
_publ_contact_author_address                                                    
;                                                                               
Barnard College, Chemistry Department                                           
3009 Broadway                                                                   
New York, NY, 10027                                                             
;                                                                               
_publ_contact_author_phone                      ' 212-854-2074 '                
_publ_contact_author_fax                        ' 212-854-2310 '                
_publ_contact_author_email        ' ldoerrer@barnard.edu '                      
_publ_requested_journal                         'Inorganic Chemistry'           
_publ_requested_coeditor_name                   ' Prof James Mayer '            
#============================================================================== 
# 3. TITLE AND AUTHOR LIST                                                      
_publ_section_title                                                             
;                                                                               
Homoleptic Cobalt and Copper Phenolate A2[M(OAr)4] Compounds
The Effect of Phenoxide Fluorination
;                                                                               
# The loop structure below should contain the names and addresses of all        
# authors, in the required order of publication. Repeat as necessary.           
loop_                                                                           
        _publ_author_name                                                       
        _publ_author_address                                                    
        _publ_author_footnote                                                   
'Buzzeo, Marisa C.'                               #<--'Last name, first name'   
;                                                                               
Barnard College, Chemistry Department                                           
3009 Broadway                                                                   
New York, NY, 10027                                                             
;                                                                               
'Iqbal, Amber H.'                                                               
;                                                                               
Barnard College, Chemistry Department                                           
3009 Broadway                                                                   
New York, NY, 10027                                                             
;                                                                               
'Long, Charli M.'                                                               
;                                                                               
Barnard College, Chemistry Department                                           
3009 Broadway                                                                   
New York, NY, 10027                                                             
;                                                                               
'Millar, David'                                                                 
;                                                                               
Barnard College, Chemistry Department                                           
3009 Broadway                                                                   
New York, NY, 10027                                                             
;                                                                               
'Patel, Sonal'                                                                  
;                                                                               
Barnard College, Chemistry Department                                           
3009 Broadway                                                                   
New York, NY, 10027                                                             
;                                                                               
'Pellow, Matthew A.'                                                            
;                                                                               
Barnard College, Chemistry Department                                           
3009 Broadway                                                                   
New York, NY, 10027                                                             
;                                                                               
'Saddoughi, Sahar A.'                                                           
;                                                                               
Barnard College, Chemistry Department                                           
3009 Broadway                                                                   
New York, NY, 10027                                                             
;                                                                               
'Smenton, Abigail L.'                                                           
;                                                                               
Barnard College, Chemistry Department                                           
3009 Broadway                                                                   
New York, NY, 10027                                                             
;                                                                               
'Turner, John F. C.'                                                            
;                                                                               
Department of Chemistry                                                         
408 Buehler Hall                                                                
University of Tennessee                                                         
Knoxville, TN 37996                                                             
;                                                                               
'Wadhawan, Jay D.'                                                              
;                                                                               
Physical and Theoretical Chemistry Laboratory                                   
University of Oxford                                                            
OXFORD OX1 3QZ, UK                                                              
;                                                                               
'Compton, Richard G.'
;                                                                          
Physical and Theoretical Chemistry Laboratory                                   
University of Oxford                                                            
OXFORD OX1 3QZ, UK                                                              
;                                                                               
'Golen, James A.'                                                               
;                                                                               
Department of Chemistry and Biochemistry                                        
MC 0358                                                                         
University of California, San Diego                                             
9500 Gilman Drive                                                               
La Jolla, CA 92093                                                              
;
;                                                                               
permanent address is the Department of Chemistry & Biochemistry, University of  
Massachusetts Dartmouth, North Dartmouth MA 02747                               
;                                                                               
'Rheingold, Arnold L.'                                                          
;                                                                               
Department of Chemistry and Biochemistry                                        
MC 0358                                                                         
University of California, San Diego                                             
9500 Gilman Drive                                                               
La Jolla, CA 92093                                                              
;                                                                               
#============================================================================== 
_chemical_name_systematic 
; 
 ? 
; 
_chemical_name_common             ? 
_chemical_melting_point           ? 
_chemical_formula_moiety          ? 
_chemical_formula_sum 
 'C72 H40 Cu F20 O4 P2' 
_chemical_formula_weight          1474.52 
  
loop_ 
 _atom_type_symbol 
 _atom_type_description 
 _atom_type_scat_dispersion_real 
 _atom_type_scat_dispersion_imag 
 _atom_type_scat_source 
 'C'  'C'   0.0033   0.0016 
 'International Tables Vol C Tables 4.2.6.8 and 6.1.1.4' 
 'H'  'H'   0.0000   0.0000 
 'International Tables Vol C Tables 4.2.6.8 and 6.1.1.4' 
 'F'  'F'   0.0171   0.0103 
 'International Tables Vol C Tables 4.2.6.8 and 6.1.1.4' 
 'P'  'P'   0.1023   0.0942 
 'International Tables Vol C Tables 4.2.6.8 and 6.1.1.4' 
 'Cu'  'Cu'   0.3201   1.2651 
 'International Tables Vol C Tables 4.2.6.8 and 6.1.1.4' 
 'O'  'O'   0.0106   0.0060 
 'International Tables Vol C Tables 4.2.6.8 and 6.1.1.4' 
  
_symmetry_cell_setting            Monoclinic 
_symmetry_space_group_name_H-M    P2(1)/c 
  
loop_ 
 _symmetry_equiv_pos_as_xyz 
 'x, y, z' 
 '-x, y+1/2, -z+1/2' 
 '-x, -y, -z' 
 'x, -y-1/2, z-1/2' 
  
_cell_length_a                    12.0060(12) 
_cell_length_b                    18.7195(18) 
_cell_length_c                    14.9767(15) 
_cell_angle_alpha                 90.00 
_cell_angle_beta                  108.055(2) 
_cell_angle_gamma                 90.00 
_cell_volume                      3200.2(5) 
_cell_formula_units_Z             2 
_cell_measurement_temperature     293(2) 
_cell_measurement_reflns_used     2992 
_cell_measurement_theta_min       2.20 
_cell_measurement_theta_max       21.58 
  
_exptl_crystal_description        block 
_exptl_crystal_colour             green 
_exptl_crystal_size_max           0.30 
_exptl_crystal_size_mid           0.20 
_exptl_crystal_size_min           0.10 
_exptl_crystal_density_meas       0 
_exptl_crystal_density_diffrn     1.530 
_exptl_crystal_density_method     'not measured' 
_exptl_crystal_F_000              1486 
_exptl_absorpt_coefficient_mu     0.501 
_exptl_absorpt_correction_type    'Multi-scan'
_exptl_absorpt_correction_T_min   0.825 
_exptl_absorpt_correction_T_max   1.000 
_exptl_absorpt_process_details    SADABS
  
_exptl_special_details 
; 
 ? 
; 
  
_diffrn_ambient_temperature       293(2) 
_diffrn_radiation_wavelength      0.71073 
_diffrn_radiation_type            MoK\a 
_diffrn_radiation_source          'fine-focus sealed tube' 
_diffrn_radiation_monochromator   graphite 
_diffrn_measurement_device_type   'CCD area detector' 
_diffrn_measurement_method        'phi and omega scans' 
_diffrn_detector_area_resol_mean  ? 
_diffrn_standards_number          ? 
_diffrn_standards_interval_count  ? 
_diffrn_standards_interval_time   ? 
_diffrn_standards_decay_%         ? 
_diffrn_reflns_number             15445 
_diffrn_reflns_av_R_equivalents   0.0617 
_diffrn_reflns_av_sigmaI/netI     0.0764 
_diffrn_reflns_limit_h_min        -7 
_diffrn_reflns_limit_h_max        13 
_diffrn_reflns_limit_k_min        -21 
_diffrn_reflns_limit_k_max        21 
_diffrn_reflns_limit_l_min        -17 
_diffrn_reflns_limit_l_max        16 
_diffrn_reflns_theta_min          2.09 
_diffrn_reflns_theta_max          24.00 
_reflns_number_total              5015 
_reflns_number_gt                 2933 
_reflns_threshold_expression      >2sigma(I) 
  
_computing_data_collection        'Bruker SMART' 
_computing_cell_refinement        'Bruker SMART' 
_computing_data_reduction         'Bruker SAINT' 
_computing_structure_solution     'SHELXS-97 (Sheldrick, 1990)' 
_computing_structure_refinement   'SHELXL-97 (Sheldrick, 1997)' 
_computing_molecular_graphics     'Bruker SHELXTL' 
_computing_publication_material   'Bruker SHELXTL' 
  
_refine_special_details 
; 
 Refinement of F^2^ against ALL reflections.  The weighted R-factor wR and 
 goodness of fit S are based on F^2^, conventional R-factors R are based 
 on F, with F set to zero for negative F^2^. The threshold expression of 
 F^2^ > 2sigma(F^2^) is used only for calculating R-factors(gt) etc. and is 
 not relevant to the choice of reflections for refinement.  R-factors based 
 on F^2^ are statistically about twice as large as those based on F, and R- 
 factors based on ALL data will be even larger. 
; 
  
_refine_ls_structure_factor_coef  Fsqd 
_refine_ls_matrix_type            full 
_refine_ls_weighting_scheme       calc 
_refine_ls_weighting_details 
 'calc w=1/[\s^2^(Fo^2^)+(0.0440P)^2^+0.0000P] where P=(Fo^2^+2Fc^2^)/3' 
_atom_sites_solution_primary      direct 
_atom_sites_solution_secondary    difmap 
_atom_sites_solution_hydrogens    geom 
_refine_ls_hydrogen_treatment     mixed 
_refine_ls_extinction_method      none 
_refine_ls_extinction_coef        ? 
_refine_ls_number_reflns          5015 
_refine_ls_number_parameters      448 
_refine_ls_number_restraints      0 
_refine_ls_R_factor_all           0.1060 
_refine_ls_R_factor_gt            0.0520 
_refine_ls_wR_factor_ref          0.1143 
_refine_ls_wR_factor_gt           0.0963 
_refine_ls_goodness_of_fit_ref    1.001 
_refine_ls_restrained_S_all       1.001 
_refine_ls_shift/su_max           0.001 
_refine_ls_shift/su_mean          0.000 
  
loop_ 
 _atom_site_label 
 _atom_site_type_symbol 
 _atom_site_fract_x 
 _atom_site_fract_y 
 _atom_site_fract_z 
 _atom_site_U_iso_or_equiv 
 _atom_site_adp_type 
 _atom_site_occupancy 
 _atom_site_symmetry_multiplicity 
 _atom_site_calc_flag 
 _atom_site_refinement_flags 
 _atom_site_disorder_assembly 
 _atom_site_disorder_group 
P1 P 0.82559(10) 0.38062(5) 1.00566(7) 0.0477(3) Uani 1 1 d . . . 
Cu1 Cu 1.0000 0.0000 1.0000 0.0474(2) Uani 1 2 d S . . 
O1 O 1.0686(3) 0.04136(17) 1.12137(18) 0.0730(9) Uani 1 1 d . . . 
O2 O 1.1477(2) -0.00363(15) 0.97471(17) 0.0618(8) Uani 1 1 d . . . 
F1 F 1.0680(3) 0.15055(14) 0.99740(19) 0.0948(9) Uani 1 1 d . . . 
F2 F 1.2434(3) 0.24401(14) 1.0343(2) 0.1146(11) Uani 1 1 d . . . 
F3 F 1.4217(3) 0.23810(17) 1.1983(2) 0.1206(11) Uani 1 1 d . . . 
F4 F 1.4223(3) 0.13177(18) 1.3214(2) 0.1235(12) Uani 1 1 d . . . 
F5 F 1.2532(3) 0.03389(16) 1.28275(17) 0.1015(10) Uani 1 1 d . . . 
F6 F 1.3440(2) 0.07361(13) 0.98309(17) 0.0767(8) Uani 1 1 d . . . 
F7 F 1.5501(2) 0.04328(16) 1.10978(19) 0.0942(9) Uani 1 1 d . . . 
F8 F 1.5713(3) -0.06752(19) 1.2302(2) 0.1205(12) Uani 1 1 d . . . 
F9 F 1.3764(3) -0.14236(17) 1.2293(2) 0.1168(11) Uani 1 1 d . . . 
F10 F 1.1689(3) -0.11322(14) 1.10305(19) 0.0934(9) Uani 1 1 d . . . 
C1 C 1.1511(4) 0.0895(2) 1.1388(3) 0.0548(11) Uani 1 1 d . . . 
C2 C 1.1550(4) 0.1454(2) 1.0795(3) 0.0611(12) Uani 1 1 d . . . 
C3 C 1.2449(5) 0.1930(2) 1.0974(4) 0.0667(13) Uani 1 1 d . . . 
C4 C 1.3348(5) 0.1888(3) 1.1795(4) 0.0754(15) Uani 1 1 d . . . 
C5 C 1.3338(4) 0.1364(3) 1.2413(3) 0.0732(14) Uani 1 1 d . . . 
C6 C 1.2455(4) 0.0875(3) 1.2209(3) 0.0638(13) Uani 1 1 d . . . 
C7 C 1.2475(4) -0.0191(2) 1.0363(3) 0.0541(11) Uani 1 1 d . . . 
C8 C 1.3510(4) 0.0182(2) 1.0427(3) 0.0546(11) Uani 1 1 d . . . 
C9 C 1.4555(4) 0.0039(3) 1.1071(3) 0.0627(12) Uani 1 1 d . . . 
C10 C 1.4660(5) -0.0507(3) 1.1689(3) 0.0720(14) Uani 1 1 d . . . 
C11 C 1.3683(5) -0.0882(3) 1.1675(3) 0.0742(14) Uani 1 1 d . . . 
C12 C 1.2635(4) -0.0741(2) 1.1021(3) 0.0596(12) Uani 1 1 d . . . 
C13 C 0.7533(4) 0.4649(2) 0.9938(3) 0.0526(11) Uani 1 1 d . . . 
C14 C 0.6361(5) 0.4702(3) 0.9466(3) 0.0742(14) Uani 1 1 d . . . 
H14A H 0.5934 0.4294 0.9218 0.089 Uiso 1 1 calc R . . 
C15 C 0.5809(5) 0.5356(4) 0.9358(4) 0.0926(17) Uani 1 1 d . . . 
H15A H 0.5015 0.5388 0.9029 0.111 Uiso 1 1 calc R . . 
C16 C 0.6416(7) 0.5954(3) 0.9725(4) 0.094(2) Uani 1 1 d . . . 
H16A H 0.6036 0.6393 0.9652 0.113 Uiso 1 1 calc R . . 
C17 C 0.7587(6) 0.5911(3) 1.0205(4) 0.0908(17) Uani 1 1 d . . . 
H17A H 0.8003 0.6319 1.0466 0.109 Uiso 1 1 calc R . . 
C18 C 0.8146(5) 0.5262(2) 1.0300(3) 0.0698(14) Uani 1 1 d . . . 
H18A H 0.8946 0.5235 1.0611 0.084 Uiso 1 1 calc R . . 
C19 C 0.9502(4) 0.3827(2) 1.1091(3) 0.0479(10) Uani 1 1 d . . . 
C20 C 1.0565(4) 0.3547(2) 1.1090(3) 0.0678(13) Uani 1 1 d . . . 
H20A H 1.0635 0.3337 1.0548 0.081 Uiso 1 1 calc R . . 
C21 C 1.1515(4) 0.3576(3) 1.1879(3) 0.0854(16) Uani 1 1 d . . . 
H21A H 1.2233 0.3399 1.1865 0.102 Uiso 1 1 calc R . . 
C22 C 1.1413(5) 0.3866(3) 1.2696(3) 0.0762(15) Uani 1 1 d . . . 
H22A H 1.2054 0.3874 1.3239 0.091 Uiso 1 1 calc R . . 
C23 C 1.0375(5) 0.4139(2) 1.2702(3) 0.0671(13) Uani 1 1 d . . . 
H23A H 1.0313 0.4341 1.3251 0.081 Uiso 1 1 calc R . . 
C24 C 0.9407(4) 0.4126(2) 1.1916(3) 0.0558(11) Uani 1 1 d . . . 
H24A H 0.8698 0.4315 1.1934 0.067 Uiso 1 1 calc R . . 
C25 C 0.8694(4) 0.3631(2) 0.9037(3) 0.0487(10) Uani 1 1 d . . . 
C26 C 0.8637(4) 0.4151(2) 0.8374(3) 0.0677(13) Uani 1 1 d . . . 
H26A H 0.8348 0.4602 0.8442 0.081 Uiso 1 1 calc R . . 
C27 C 0.9008(5) 0.4006(3) 0.7610(3) 0.0862(17) Uani 1 1 d . . . 
H27A H 0.8976 0.4358 0.7164 0.103 Uiso 1 1 calc R . . 
C28 C 0.9424(5) 0.3343(3) 0.7512(4) 0.0946(19) Uani 1 1 d . . . 
H28A H 0.9670 0.3243 0.6994 0.113 Uiso 1 1 calc R . . 
C29 C 0.9483(4) 0.2820(3) 0.8165(4) 0.0815(15) Uani 1 1 d . . . 
H29A H 0.9782 0.2372 0.8096 0.098 Uiso 1 1 calc R . . 
C30 C 0.9104(4) 0.2956(2) 0.8916(3) 0.0658(13) Uani 1 1 d . . . 
H30A H 0.9119 0.2596 0.9348 0.079 Uiso 1 1 calc R . . 
C31 C 0.7269(3) 0.3116(2) 1.0150(3) 0.0486(10) Uani 1 1 d . . . 
C32 C 0.7249(4) 0.2881(3) 1.1014(3) 0.0774(15) Uani 1 1 d . . . 
H32A H 0.7779 0.3064 1.1557 0.093 Uiso 1 1 calc R . . 
C33 C 0.6445(5) 0.2372(3) 1.1078(4) 0.0999(19) Uani 1 1 d . . . 
H33A H 0.6435 0.2214 1.1664 0.120 Uiso 1 1 calc R . . 
C34 C 0.5670(5) 0.2104(3) 1.0288(5) 0.0911(17) Uani 1 1 d . . . 
H34A H 0.5133 0.1760 1.0336 0.109 Uiso 1 1 calc R . . 
C35 C 0.5666(4) 0.2331(3) 0.9423(4) 0.0783(15) Uani 1 1 d . . . 
H35A H 0.5125 0.2150 0.8884 0.094 Uiso 1 1 calc R . . 
C36 C 0.6479(4) 0.2834(2) 0.9360(3) 0.0654(13) Uani 1 1 d . . . 
H36A H 0.6491 0.2984 0.8771 0.078 Uiso 1 1 calc R . . 
  
loop_ 
 _atom_site_aniso_label 
 _atom_site_aniso_U_11 
 _atom_site_aniso_U_22 
 _atom_site_aniso_U_33 
 _atom_site_aniso_U_23 
 _atom_site_aniso_U_13 
 _atom_site_aniso_U_12 
P1 0.0513(7) 0.0459(6) 0.0463(6) 0.0014(5) 0.0157(6) -0.0009(6) 
Cu1 0.0477(5) 0.0495(4) 0.0428(4) 0.0014(3) 0.0110(3) -0.0089(4) 
O1 0.070(2) 0.097(2) 0.0527(18) -0.0188(17) 0.0207(16) -0.041(2) 
O2 0.0496(18) 0.091(2) 0.0428(16) 0.0045(16) 0.0120(14) 0.0023(18) 
F1 0.091(2) 0.083(2) 0.086(2) 0.0094(16) -0.0082(18) 0.0029(17) 
F2 0.146(3) 0.0590(18) 0.130(3) 0.0197(18) 0.030(2) -0.0195(19) 
F3 0.107(2) 0.116(2) 0.133(3) -0.022(2) 0.030(2) -0.068(2) 
F4 0.090(2) 0.164(3) 0.084(2) -0.001(2) -0.0194(19) -0.043(2) 
F5 0.124(3) 0.116(2) 0.0554(17) 0.0096(16) 0.0154(17) -0.044(2) 
F6 0.0729(19) 0.0835(18) 0.0765(17) 0.0197(15) 0.0272(15) -0.0033(15) 
F7 0.0543(17) 0.133(2) 0.094(2) -0.0060(18) 0.0211(15) -0.0189(19) 
F8 0.072(2) 0.196(4) 0.081(2) 0.028(2) 0.0063(17) 0.042(2) 
F9 0.130(3) 0.114(2) 0.109(2) 0.059(2) 0.040(2) 0.037(2) 
F10 0.091(2) 0.083(2) 0.108(2) 0.0167(16) 0.0345(18) -0.0179(18) 
C1 0.053(3) 0.061(3) 0.053(3) -0.017(2) 0.020(3) -0.009(3) 
C2 0.057(3) 0.056(3) 0.061(3) -0.003(3) 0.006(3) 0.005(3) 
C3 0.080(4) 0.040(3) 0.082(4) 0.001(3) 0.027(3) -0.005(3) 
C4 0.066(4) 0.070(4) 0.089(4) -0.021(3) 0.022(3) -0.031(3) 
C5 0.060(3) 0.089(4) 0.058(3) -0.011(3) 0.001(3) -0.014(3) 
C6 0.072(4) 0.070(3) 0.050(3) -0.007(3) 0.019(3) -0.019(3) 
C7 0.056(3) 0.065(3) 0.041(3) 0.004(2) 0.016(2) 0.007(3) 
C8 0.050(3) 0.063(3) 0.053(3) 0.004(2) 0.018(2) 0.001(3) 
C9 0.046(3) 0.086(4) 0.061(3) -0.007(3) 0.023(3) -0.006(3) 
C10 0.050(3) 0.106(4) 0.056(3) 0.009(3) 0.009(3) 0.021(3) 
C11 0.091(4) 0.073(4) 0.060(3) 0.022(3) 0.026(3) 0.022(3) 
C12 0.051(3) 0.065(3) 0.062(3) 0.005(3) 0.016(3) -0.006(3) 
C13 0.060(3) 0.046(3) 0.057(3) 0.007(2) 0.025(2) 0.005(3) 
C14 0.073(4) 0.062(3) 0.086(4) 0.008(3) 0.022(3) 0.008(3) 
C15 0.084(4) 0.089(4) 0.109(4) 0.039(4) 0.036(4) 0.035(4) 
C16 0.136(6) 0.056(4) 0.115(5) 0.033(3) 0.076(5) 0.036(4) 
C17 0.113(5) 0.050(4) 0.117(5) 0.015(3) 0.047(4) 0.008(4) 
C18 0.084(4) 0.041(3) 0.087(4) 0.011(3) 0.031(3) 0.005(3) 
C19 0.054(3) 0.045(2) 0.045(3) -0.001(2) 0.016(2) -0.002(2) 
C20 0.053(3) 0.094(4) 0.053(3) -0.019(3) 0.011(3) 0.003(3) 
C21 0.061(3) 0.111(4) 0.075(4) -0.023(3) 0.008(3) 0.015(3) 
C22 0.074(4) 0.088(4) 0.051(3) -0.011(3) -0.002(3) -0.004(3) 
C23 0.095(4) 0.059(3) 0.045(3) -0.009(2) 0.019(3) -0.005(3) 
C24 0.068(3) 0.053(3) 0.050(3) -0.005(2) 0.023(3) 0.003(2) 
C25 0.053(3) 0.050(3) 0.041(2) -0.004(2) 0.012(2) -0.006(2) 
C26 0.092(4) 0.056(3) 0.059(3) -0.005(2) 0.029(3) -0.016(3) 
C27 0.136(5) 0.075(4) 0.060(3) -0.007(3) 0.048(3) -0.037(4) 
C28 0.122(5) 0.104(5) 0.077(4) -0.039(4) 0.059(4) -0.038(4) 
C29 0.090(4) 0.084(4) 0.075(4) -0.028(3) 0.033(3) -0.003(3) 
C30 0.080(4) 0.061(3) 0.056(3) -0.011(2) 0.021(3) -0.001(3) 
C31 0.046(3) 0.045(2) 0.052(3) 0.003(2) 0.011(2) 0.000(2) 
C32 0.072(4) 0.089(4) 0.066(3) 0.011(3) 0.014(3) -0.020(3) 
C33 0.102(5) 0.114(5) 0.082(4) 0.021(3) 0.026(4) -0.043(4) 
C34 0.087(4) 0.072(4) 0.116(5) 0.009(4) 0.034(4) -0.030(3) 
C35 0.069(4) 0.066(3) 0.089(4) -0.012(3) 0.010(3) -0.015(3) 
C36 0.067(3) 0.059(3) 0.064(3) 0.005(2) 0.013(3) -0.009(3) 
  
_geom_special_details 
; 
 All esds (except the esd in the dihedral angle between two l.s. planes) 
 are estimated using the full covariance matrix.  The cell esds are taken 
 into account individually in the estimation of esds in distances, angles 
 and torsion angles; correlations between esds in cell parameters are only 
 used when they are defined by crystal symmetry.  An approximate (isotropic) 
 treatment of cell esds is used for estimating esds involving l.s. planes. 
; 
  
loop_ 
 _geom_bond_atom_site_label_1 
 _geom_bond_atom_site_label_2 
 _geom_bond_distance 
 _geom_bond_site_symmetry_2 
 _geom_bond_publ_flag 
P1 C13 1.783(4) . ? 
P1 C31 1.787(4) . ? 
P1 C19 1.790(4) . ? 
P1 C25 1.793(4) . ? 
Cu1 O1 1.912(3) 3_757 ? 
Cu1 O1 1.912(3) . ? 
Cu1 O2 1.926(3) 3_757 ? 
Cu1 O2 1.926(3) . ? 
O1 C1 1.305(5) . ? 
O2 C7 1.298(5) . ? 
F1 C2 1.348(5) . ? 
F2 C3 1.339(5) . ? 
F3 C4 1.356(5) . ? 
F4 C5 1.336(5) . ? 
F5 C6 1.350(5) . ? 
F6 C8 1.355(4) . ? 
F7 C9 1.345(5) . ? 
F8 C10 1.349(5) . ? 
F9 C11 1.356(5) . ? 
F10 C12 1.356(5) . ? 
C1 C2 1.381(6) . ? 
C1 C6 1.390(6) . ? 
C2 C3 1.361(6) . ? 
C3 C4 1.364(6) . ? 
C4 C5 1.351(6) . ? 
C5 C6 1.361(6) . ? 
C7 C12 1.396(5) . ? 
C7 C8 1.403(6) . ? 
C8 C9 1.350(6) . ? 
C9 C10 1.358(6) . ? 
C10 C11 1.361(6) . ? 
C11 C12 1.360(6) . ? 
C13 C14 1.369(6) . ? 
C13 C18 1.380(5) . ? 
C14 C15 1.377(6) . ? 
C15 C16 1.355(7) . ? 
C16 C17 1.370(7) . ? 
C17 C18 1.373(6) . ? 
C19 C20 1.380(5) . ? 
C19 C24 1.393(5) . ? 
C20 C21 1.366(6) . ? 
C21 C22 1.379(6) . ? 
C22 C23 1.349(6) . ? 
C23 C24 1.374(6) . ? 
C25 C26 1.378(5) . ? 
C25 C30 1.389(5) . ? 
C26 C27 1.378(6) . ? 
C27 C28 1.363(7) . ? 
C28 C29 1.370(7) . ? 
C29 C30 1.361(6) . ? 
C31 C36 1.372(5) . ? 
C31 C32 1.374(5) . ? 
C32 C33 1.380(6) . ? 
C33 C34 1.356(6) . ? 
C34 C35 1.361(6) . ? 
C35 C36 1.380(6) . ? 
  
loop_ 
 _geom_angle_atom_site_label_1 
 _geom_angle_atom_site_label_2 
 _geom_angle_atom_site_label_3 
 _geom_angle 
 _geom_angle_site_symmetry_1 
 _geom_angle_site_symmetry_3 
 _geom_angle_publ_flag 
C13 P1 C31 109.4(2) . . ? 
C13 P1 C19 108.5(2) . . ? 
C31 P1 C19 110.16(18) . . ? 
C13 P1 C25 109.85(19) . . ? 
C31 P1 C25 108.12(19) . . ? 
C19 P1 C25 110.74(19) . . ? 
O1 Cu1 O1 180.000(1) 3_757 . ? 
O1 Cu1 O2 92.83(12) 3_757 3_757 ? 
O1 Cu1 O2 87.17(12) . 3_757 ? 
O1 Cu1 O2 87.17(12) 3_757 . ? 
O1 Cu1 O2 92.83(12) . . ? 
O2 Cu1 O2 180.000(1) 3_757 . ? 
C1 O1 Cu1 123.2(3) . . ? 
C7 O2 Cu1 124.8(2) . . ? 
O1 C1 C2 124.7(4) . . ? 
O1 C1 C6 121.2(4) . . ? 
C2 C1 C6 114.1(4) . . ? 
F1 C2 C3 118.4(5) . . ? 
F1 C2 C1 118.0(4) . . ? 
C3 C2 C1 123.5(5) . . ? 
F2 C3 C2 119.5(5) . . ? 
F2 C3 C4 120.8(5) . . ? 
C2 C3 C4 119.8(5) . . ? 
C5 C4 F3 121.5(5) . . ? 
C5 C4 C3 119.2(5) . . ? 
F3 C4 C3 119.4(5) . . ? 
F4 C5 C4 119.2(5) . . ? 
F4 C5 C6 120.4(5) . . ? 
C4 C5 C6 120.4(5) . . ? 
F5 C6 C5 117.5(4) . . ? 
F5 C6 C1 119.4(4) . . ? 
C5 C6 C1 123.0(5) . . ? 
O2 C7 C12 124.1(4) . . ? 
O2 C7 C8 122.7(4) . . ? 
C12 C7 C8 113.1(4) . . ? 
C9 C8 F6 118.4(4) . . ? 
C9 C8 C7 123.9(4) . . ? 
F6 C8 C7 117.6(4) . . ? 
F7 C9 C8 120.1(5) . . ? 
F7 C9 C10 119.5(5) . . ? 
C8 C9 C10 120.4(5) . . ? 
F8 C10 C9 120.6(5) . . ? 
F8 C10 C11 120.7(5) . . ? 
C9 C10 C11 118.6(5) . . ? 
F9 C11 C12 119.5(5) . . ? 
F9 C11 C10 119.7(5) . . ? 
C12 C11 C10 120.7(5) . . ? 
F10 C12 C11 118.6(4) . . ? 
F10 C12 C7 118.2(4) . . ? 
C11 C12 C7 123.1(5) . . ? 
C14 C13 C18 118.7(4) . . ? 
C14 C13 P1 120.4(4) . . ? 
C18 C13 P1 120.9(4) . . ? 
C13 C14 C15 120.3(5) . . ? 
C16 C15 C14 120.5(6) . . ? 
C15 C16 C17 120.0(6) . . ? 
C16 C17 C18 119.7(6) . . ? 
C17 C18 C13 120.7(5) . . ? 
C20 C19 C24 119.0(4) . . ? 
C20 C19 P1 121.1(3) . . ? 
C24 C19 P1 120.0(3) . . ? 
C21 C20 C19 120.6(4) . . ? 
C20 C21 C22 120.2(5) . . ? 
C23 C22 C21 119.4(5) . . ? 
C22 C23 C24 121.7(4) . . ? 
C23 C24 C19 119.1(4) . . ? 
C26 C25 C30 119.3(4) . . ? 
C26 C25 P1 121.5(3) . . ? 
C30 C25 P1 119.1(3) . . ? 
C27 C26 C25 120.2(4) . . ? 
C28 C27 C26 119.6(5) . . ? 
C27 C28 C29 120.9(5) . . ? 
C30 C29 C28 120.0(5) . . ? 
C29 C30 C25 120.0(4) . . ? 
C36 C31 C32 118.6(4) . . ? 
C36 C31 P1 120.6(3) . . ? 
C32 C31 P1 120.7(3) . . ? 
C31 C32 C33 120.3(5) . . ? 
C34 C33 C32 120.0(5) . . ? 
C33 C34 C35 120.9(5) . . ? 
C34 C35 C36 119.0(5) . . ? 
C31 C36 C35 121.2(4) . . ? 
  
_diffrn_measured_fraction_theta_max    0.999 
_diffrn_reflns_theta_full              24.00 
_diffrn_measured_fraction_theta_full   0.999 
_refine_diff_density_max    0.216 
_refine_diff_density_min   -0.282 
_refine_diff_density_rms    0.048
#===END 
  
data_Compound5 
  
_audit_creation_method            SHELXL-97 
# 1. SUBMISSION DETAILS                                                         
_publ_contact_author_name                       'Linda H. Doerrer'              
_publ_contact_author_address                                                    
;                                                                               
Barnard College, Chemistry Department                                           
3009 Broadway                                                                   
New York, NY, 10027                                                             
;                                                                               
_publ_contact_author_phone                      ' 212-854-2074 '                
_publ_contact_author_fax                        ' 212-854-2310 '                
_publ_contact_author_email        ' ldoerrer@barnard.edu '                      
_publ_requested_journal                         'Inorganic Chemistry'           
_publ_requested_coeditor_name                   ' Prof James Mayer '            
#============================================================================== 
# 3. TITLE AND AUTHOR LIST                                                      
_publ_section_title                                                             
;                                                                               
Homoleptic Cobalt and Copper Phenolate A2[M(OAr)4] Compounds
The Effect of Phenoxide Fluorination
;                                                                               
# The loop structure below should contain the names and addresses of all        
# authors, in the required order of publication. Repeat as necessary.           
loop_                                                                           
        _publ_author_name                                                       
        _publ_author_address                                                    
        _publ_author_footnote                                                   
'Buzzeo, Marisa C.'                               #<--'Last name, first name'   
;                                                                               
Barnard College, Chemistry Department                                           
3009 Broadway                                                                   
New York, NY, 10027                                                             
;                                                                               
'Iqbal, Amber H.'                                                               
;                                                                               
Barnard College, Chemistry Department                                           
3009 Broadway                                                                   
New York, NY, 10027                                                             
;                                                                               
'Long, Charli M.'                                                               
;                                                                               
Barnard College, Chemistry Department                                           
3009 Broadway                                                                   
New York, NY, 10027                                                             
;                                                                               
'Millar, David'                                                                 
;                                                                               
Barnard College, Chemistry Department                                           
3009 Broadway                                                                   
New York, NY, 10027                                                             
;                                                                               
'Patel, Sonal'                                                                  
;                                                                               
Barnard College, Chemistry Department                                           
3009 Broadway                                                                   
New York, NY, 10027                                                             
;                                                                               
'Pellow, Matthew A.'                                                            
;                                                                               
Barnard College, Chemistry Department                                           
3009 Broadway                                                                   
New York, NY, 10027                                                             
;                                                                               
'Saddoughi, Sahar A.'                                                           
;                                                                               
Barnard College, Chemistry Department                                           
3009 Broadway                                                                   
New York, NY, 10027                                                             
;                                                                               
'Smenton, Abigail L.'                                                           
;                                                                               
Barnard College, Chemistry Department                                           
3009 Broadway                                                                   
New York, NY, 10027                                                             
;                                                                               
'Turner, John F. C.'                                                            
;                                                                               
Department of Chemistry                                                         
408 Buehler Hall                                                                
University of Tennessee                                                         
Knoxville, TN 37996                                                             
;                                                                               
'Wadhawan, Jay D.'                                                              
;                                                                               
Physical and Theoretical Chemistry Laboratory                                   
University of Oxford                                                            
OXFORD OX1 3QZ, UK                                                              
;                                                                               
'Compton, Richard G.'
;                                                                          
Physical and Theoretical Chemistry Laboratory                                   
University of Oxford                                                            
OXFORD OX1 3QZ, UK                                                              
;                                                                               
'Golen, James A.'                                                               
;                                                                               
Department of Chemistry and Biochemistry                                        
MC 0358                                                                         
University of California, San Diego                                             
9500 Gilman Drive                                                               
La Jolla, CA 92093                                                              
;
;                                                                               
permanent address is the Department of Chemistry & Biochemistry, University of  
Massachusetts Dartmouth, North Dartmouth MA 02747                               
;                                                                               
'Rheingold, Arnold L.'                                                          
;                                                                               
Department of Chemistry and Biochemistry                                        
MC 0358                                                                         
University of California, San Diego                                             
9500 Gilman Drive                                                               
La Jolla, CA 92093                                                              
;                                                                               
#============================================================================== 
_chemical_name_systematic 
; 
 ? 
; 
_chemical_name_common             ? 
_chemical_melting_point           ? 
_chemical_formula_moiety          ? 
_chemical_formula_sum 
 'C36 H32 Cu F20 N2 O4' 
_chemical_formula_weight          1000.18 
  
loop_ 
 _atom_type_symbol 
 _atom_type_description 
 _atom_type_scat_dispersion_real 
 _atom_type_scat_dispersion_imag 
 _atom_type_scat_source 
 'C'  'C'   0.0033   0.0016 
 'International Tables Vol C Tables 4.2.6.8 and 6.1.1.4' 
 'H'  'H'   0.0000   0.0000 
 'International Tables Vol C Tables 4.2.6.8 and 6.1.1.4' 
 'N'  'N'   0.0061   0.0033 
 'International Tables Vol C Tables 4.2.6.8 and 6.1.1.4' 
 'O'  'O'   0.0106   0.0060 
 'International Tables Vol C Tables 4.2.6.8 and 6.1.1.4' 
 'F'  'F'   0.0171   0.0103 
 'International Tables Vol C Tables 4.2.6.8 and 6.1.1.4' 
 'Cu'  'Cu'   0.3201   1.2651 
 'International Tables Vol C Tables 4.2.6.8 and 6.1.1.4' 
  
_symmetry_cell_setting            Monoclinic 
_symmetry_space_group_name_H-M    P2(1)/c 
  
loop_ 
 _symmetry_equiv_pos_as_xyz 
 'x, y, z' 
 '-x, y+1/2, -z+1/2' 
 '-x, -y, -z' 
 'x, -y-1/2, z-1/2' 
  
_cell_length_a                    12.5488(7) 
_cell_length_b                    12.4550(7) 
_cell_length_c                    14.0038(8) 
_cell_angle_alpha                 90.00 
_cell_angle_beta                  114.2820(10) 
_cell_angle_gamma                 90.00 
_cell_volume                      1995.10(19) 
_cell_formula_units_Z             2 
_cell_measurement_temperature     218(2) 
_cell_measurement_reflns_used     9231 
_cell_measurement_theta_min       2.42 
_cell_measurement_theta_max       28.23 
  
_exptl_crystal_description        Block 
_exptl_crystal_colour             Green 
_exptl_crystal_size_max           0.35 
_exptl_crystal_size_mid           0.25 
_exptl_crystal_size_min           0.20 
_exptl_crystal_density_meas       0 
_exptl_crystal_density_diffrn     1.665 
_exptl_crystal_density_method     'not measured' 
_exptl_crystal_F_000              1006 
_exptl_absorpt_coefficient_mu     0.683 
_exptl_absorpt_correction_type    'Multi-scan'
_exptl_absorpt_correction_T_min   0.816 
_exptl_absorpt_correction_T_max   1.000
_exptl_absorpt_process_details    SADABS
  
_exptl_special_details 
; 
 ? 
; 
  
_diffrn_ambient_temperature       218(2) 
_diffrn_radiation_wavelength      0.71073 
_diffrn_radiation_type            MoK\a 
_diffrn_radiation_source          'fine-focus sealed tube' 
_diffrn_radiation_monochromator   graphite 
_diffrn_measurement_device_type   'CCD area detector' 
_diffrn_measurement_method        'phi and omega scans' 
_diffrn_detector_area_resol_mean  ? 
_diffrn_standards_number          ? 
_diffrn_standards_interval_count  ? 
_diffrn_standards_interval_time   ? 
_diffrn_standards_decay_%         ? 
_diffrn_reflns_number             14444 
_diffrn_reflns_av_R_equivalents   0.0242 
_diffrn_reflns_av_sigmaI/netI     0.0253 
_diffrn_reflns_limit_h_min        -16 
_diffrn_reflns_limit_h_max        16 
_diffrn_reflns_limit_k_min        -16 
_diffrn_reflns_limit_k_max        16 
_diffrn_reflns_limit_l_min        -18 
_diffrn_reflns_limit_l_max        18 
_diffrn_reflns_theta_min          2.28 
_diffrn_reflns_theta_max          28.26 
_reflns_number_total              4751 
_reflns_number_gt                 4138 
_reflns_threshold_expression      >2sigma(I) 
  
_computing_data_collection        'Bruker SMART' 
_computing_cell_refinement        'Bruker SMART' 
_computing_data_reduction         'Bruker SAINT' 
_computing_structure_solution     'SHELXS-97 (Sheldrick, 1990)' 
_computing_structure_refinement   'SHELXL-97 (Sheldrick, 1997)' 
_computing_molecular_graphics     'Bruker SHELXTL' 
_computing_publication_material   'Bruker SHELXTL' 
  
_refine_special_details 
; 
 Refinement of F^2^ against ALL reflections.  The weighted R-factor wR and 
 goodness of fit S are based on F^2^, conventional R-factors R are based 
 on F, with F set to zero for negative F^2^. The threshold expression of 
 F^2^ > 2sigma(F^2^) is used only for calculating R-factors(gt) etc. and is 
 not relevant to the choice of reflections for refinement.  R-factors based 
 on F^2^ are statistically about twice as large as those based on F, and R- 
 factors based on ALL data will be even larger. 
; 
  
_refine_ls_structure_factor_coef  Fsqd 
_refine_ls_matrix_type            full 
_refine_ls_weighting_scheme       calc 
_refine_ls_weighting_details 
 'calc w=1/[\s^2^(Fo^2^)+(0.0656P)^2^+0.1665P] where P=(Fo^2^+2Fc^2^)/3' 
_atom_sites_solution_primary      direct 
_atom_sites_solution_secondary    difmap 
_atom_sites_solution_hydrogens    geom 
_refine_ls_hydrogen_treatment     mixed 
_refine_ls_extinction_method      none 
_refine_ls_extinction_coef        ? 
_refine_ls_number_reflns          4751 
_refine_ls_number_parameters      350 
_refine_ls_number_restraints      0 
_refine_ls_R_factor_all           0.0399 
_refine_ls_R_factor_gt            0.0347 
_refine_ls_wR_factor_ref          0.0997 
_refine_ls_wR_factor_gt           0.0958 
_refine_ls_goodness_of_fit_ref    1.035 
_refine_ls_restrained_S_all       1.035 
_refine_ls_shift/su_max           0.000 
_refine_ls_shift/su_mean          0.000 
  
loop_ 
 _atom_site_label 
 _atom_site_type_symbol 
 _atom_site_fract_x 
 _atom_site_fract_y 
 _atom_site_fract_z 
 _atom_site_U_iso_or_equiv 
 _atom_site_adp_type 
 _atom_site_occupancy 
 _atom_site_symmetry_multiplicity 
 _atom_site_calc_flag 
 _atom_site_refinement_flags 
 _atom_site_disorder_assembly 
 _atom_site_disorder_group 
Cu1 Cu 0.5000 1.0000 0.5000 0.03098(9) Uani 1 2 d S . . 
O1 O 0.52991(9) 0.91089(9) 0.40188(8) 0.0412(3) Uani 1 1 d . . . 
O2 O 0.34873(10) 1.02189(9) 0.38657(9) 0.0417(3) Uani 1 1 d . . . 
C1 C 0.63251(13) 0.89773(13) 0.39913(11) 0.0351(3) Uani 1 1 d . . . 
C2 C 0.67460(14) 0.79545(12) 0.39184(11) 0.0372(3) Uani 1 1 d . . . 
C3 C 0.78341(14) 0.77883(13) 0.39233(12) 0.0397(3) Uani 1 1 d . . . 
C4 C 0.85479(14) 0.86360(14) 0.39737(12) 0.0422(4) Uani 1 1 d . . . 
C5 C 0.81595(15) 0.96624(14) 0.40174(13) 0.0420(3) Uani 1 1 d . . . 
C6 C 0.70713(15) 0.98176(12) 0.40229(12) 0.0388(3) Uani 1 1 d . . . 
C7 C 0.29140(12) 1.11292(13) 0.37171(11) 0.0362(3) Uani 1 1 d . . . 
C8 C 0.34303(14) 1.21310(14) 0.37815(13) 0.0419(3) Uani 1 1 d . . . 
C9 C 0.28420(18) 1.30833(15) 0.36720(14) 0.0496(4) Uani 1 1 d . . . 
C10 C 0.16626(17) 1.30723(16) 0.34601(15) 0.0527(4) Uani 1 1 d . . . 
C11 C 0.11131(15) 1.21087(16) 0.33597(14) 0.0481(4) Uani 1 1 d . . . 
C12 C 0.17137(13) 1.11594(14) 0.34873(11) 0.0405(3) Uani 1 1 d . . . 
F1 F 0.60794(9) 0.70956(8) 0.38782(9) 0.0510(3) Uani 1 1 d . . . 
F2 F 0.82026(10) 0.67803(8) 0.38855(9) 0.0546(3) Uani 1 1 d . . . 
F3 F 0.96017(9) 0.84721(10) 0.39626(9) 0.0588(3) Uani 1 1 d . . . 
F4 F 0.88299(10) 1.05047(10) 0.40504(10) 0.0620(3) Uani 1 1 d . . . 
F5 F 0.67293(10) 1.08314(8) 0.40864(9) 0.0541(3) Uani 1 1 d . . . 
F6 F 0.45853(9) 1.21701(9) 0.39979(9) 0.0574(3) Uani 1 1 d . . . 
F7 F 0.33920(13) 1.40236(10) 0.37632(11) 0.0752(4) Uani 1 1 d . . . 
F8 F 0.10799(13) 1.40005(11) 0.33506(11) 0.0790(4) Uani 1 1 d . . . 
F9 F -0.00331(10) 1.20872(11) 0.31459(11) 0.0724(4) Uani 1 1 d . . . 
F10 F 0.11431(9) 1.02345(10) 0.34221(9) 0.0553(3) Uani 1 1 d . . . 
N1 N 0.30329(11) 0.85751(10) 0.22977(10) 0.0357(3) Uani 1 1 d . . . 
C13 C 0.29846(18) 0.74881(15) 0.27422(15) 0.0487(4) Uani 1 1 d . . . 
C14 C 0.2680(3) 0.7532(2) 0.36697(18) 0.0667(6) Uani 1 1 d . . . 
C15 C 0.37604(15) 0.85439(14) 0.16781(14) 0.0424(3) Uani 1 1 d . . . 
C16 C 0.3961(2) 0.9638(2) 0.1340(2) 0.0610(5) Uani 1 1 d . . . 
C17 C 0.18457(15) 0.90553(16) 0.17078(14) 0.0457(4) Uani 1 1 d . . . 
C18 C 0.11786(19) 0.8573(2) 0.06376(16) 0.0625(5) Uani 1 1 d . . . 
H1 H 0.3372(16) 0.8946(15) 0.2779(15) 0.039(5) Uiso 1 1 d . . . 
H13A H 0.2452(18) 0.7065(16) 0.2182(17) 0.050(5) Uiso 1 1 d . . . 
H13B H 0.375(2) 0.7219(19) 0.295(2) 0.072(7) Uiso 1 1 d . . . 
H14A H 0.322(3) 0.789(2) 0.420(3) 0.097(10) Uiso 1 1 d . . . 
H14B H 0.274(2) 0.676(2) 0.397(2) 0.083(8) Uiso 1 1 d . . . 
H14C H 0.193(3) 0.778(2) 0.348(2) 0.082(9) Uiso 1 1 d . . . 
H15A H 0.4465(18) 0.8201(17) 0.2132(15) 0.051(5) Uiso 1 1 d . . . 
H15B H 0.3363(18) 0.8030(16) 0.1086(16) 0.046(5) Uiso 1 1 d . . . 
H16A H 0.325(3) 0.9970(17) 0.085(2) 0.067(7) Uiso 1 1 d . . . 
H16B H 0.437(3) 1.013(2) 0.197(2) 0.082(9) Uiso 1 1 d . . . 
H16C H 0.444(2) 0.958(2) 0.102(2) 0.081(7) Uiso 1 1 d . . . 
H17A H 0.1422(17) 0.8928(16) 0.2127(15) 0.053(5) Uiso 1 1 d . . . 
H17B H 0.197(2) 0.9778(18) 0.1655(17) 0.053(6) Uiso 1 1 d . . . 
H18A H 0.153(2) 0.8764(19) 0.0155(19) 0.067(6) Uiso 1 1 d . . . 
H18B H 0.041(3) 0.890(2) 0.042(2) 0.086(8) Uiso 1 1 d . . . 
H18C H 0.115(3) 0.785(3) 0.068(3) 0.100(11) Uiso 1 1 d . . . 
  
loop_ 
 _atom_site_aniso_label 
 _atom_site_aniso_U_11 
 _atom_site_aniso_U_22 
 _atom_site_aniso_U_33 
 _atom_site_aniso_U_23 
 _atom_site_aniso_U_13 
 _atom_site_aniso_U_12 
Cu1 0.02826(14) 0.03136(15) 0.03129(14) -0.00594(9) 0.01020(10) -0.00066(9) 
O1 0.0347(5) 0.0459(6) 0.0415(6) -0.0141(5) 0.0141(4) 0.0012(5) 
O2 0.0332(5) 0.0454(6) 0.0386(6) -0.0103(5) 0.0067(4) 0.0049(5) 
C1 0.0370(7) 0.0379(8) 0.0274(6) -0.0047(5) 0.0103(6) 0.0035(6) 
C2 0.0409(8) 0.0353(8) 0.0325(7) -0.0064(6) 0.0121(6) -0.0003(6) 
C3 0.0435(8) 0.0389(8) 0.0331(7) -0.0050(6) 0.0120(6) 0.0103(6) 
C4 0.0365(8) 0.0542(10) 0.0366(7) -0.0004(7) 0.0157(6) 0.0069(7) 
C5 0.0456(9) 0.0416(8) 0.0394(8) 0.0037(7) 0.0181(7) -0.0029(7) 
C6 0.0458(9) 0.0335(8) 0.0366(8) 0.0002(6) 0.0165(7) 0.0056(6) 
C7 0.0315(7) 0.0463(8) 0.0279(6) -0.0029(6) 0.0094(5) 0.0044(6) 
C8 0.0357(8) 0.0522(10) 0.0383(8) 0.0053(7) 0.0157(6) 0.0018(7) 
C9 0.0571(10) 0.0467(10) 0.0466(9) 0.0089(7) 0.0229(8) 0.0014(8) 
C10 0.0559(11) 0.0558(11) 0.0478(10) 0.0127(8) 0.0228(8) 0.0229(9) 
C11 0.0356(8) 0.0656(12) 0.0425(8) 0.0026(8) 0.0153(7) 0.0128(8) 
C12 0.0333(7) 0.0522(9) 0.0339(7) -0.0042(6) 0.0117(6) 0.0009(7) 
F1 0.0495(6) 0.0370(5) 0.0630(6) -0.0124(4) 0.0197(5) -0.0071(4) 
F2 0.0550(6) 0.0419(5) 0.0622(6) -0.0102(5) 0.0193(5) 0.0149(5) 
F3 0.0418(5) 0.0760(8) 0.0620(6) -0.0024(5) 0.0249(5) 0.0079(5) 
F4 0.0585(7) 0.0528(7) 0.0799(8) 0.0094(6) 0.0339(6) -0.0081(5) 
F5 0.0659(7) 0.0320(5) 0.0670(6) 0.0022(4) 0.0301(5) 0.0081(4) 
F6 0.0391(5) 0.0660(7) 0.0701(7) 0.0042(5) 0.0254(5) -0.0056(5) 
F7 0.0875(9) 0.0475(7) 0.0947(9) 0.0143(6) 0.0415(8) -0.0044(6) 
F8 0.0856(9) 0.0631(8) 0.0898(9) 0.0174(7) 0.0377(7) 0.0371(7) 
F9 0.0370(6) 0.0938(10) 0.0858(9) -0.0013(7) 0.0249(6) 0.0181(6) 
F10 0.0387(5) 0.0611(6) 0.0640(7) -0.0154(5) 0.0190(5) -0.0109(5) 
N1 0.0380(7) 0.0332(6) 0.0330(6) -0.0083(5) 0.0118(5) -0.0069(5) 
C13 0.0549(10) 0.0399(9) 0.0473(9) 0.0009(7) 0.0169(8) -0.0077(8) 
C14 0.0780(16) 0.0724(15) 0.0488(11) 0.0002(10) 0.0251(11) -0.0270(13) 
C15 0.0417(8) 0.0442(9) 0.0434(8) -0.0026(7) 0.0196(7) 0.0011(7) 
C16 0.0596(12) 0.0595(12) 0.0730(14) 0.0108(11) 0.0365(12) -0.0045(10) 
C17 0.0424(9) 0.0459(10) 0.0490(9) -0.0022(7) 0.0192(7) 0.0035(7) 
C18 0.0444(11) 0.0841(17) 0.0470(10) -0.0027(10) 0.0067(8) -0.0046(10) 
  
_geom_special_details 
; 
 All esds (except the esd in the dihedral angle between two l.s. planes) 
 are estimated using the full covariance matrix.  The cell esds are taken 
 into account individually in the estimation of esds in distances, angles 
 and torsion angles; correlations between esds in cell parameters are only 
 used when they are defined by crystal symmetry.  An approximate (isotropic) 
 treatment of cell esds is used for estimating esds involving l.s. planes. 
; 
  
loop_ 
 _geom_bond_atom_site_label_1 
 _geom_bond_atom_site_label_2 
 _geom_bond_distance 
 _geom_bond_site_symmetry_2 
 _geom_bond_publ_flag 
Cu1 O1 1.9195(10) . ? 
Cu1 O1 1.9195(10) 3_676 ? 
Cu1 O2 1.9290(11) . ? 
Cu1 O2 1.9290(11) 3_676 ? 
O1 C1 1.3141(18) . ? 
O2 C7 1.3128(19) . ? 
C1 C6 1.393(2) . ? 
C1 C2 1.399(2) . ? 
C2 F1 1.3449(18) . ? 
C2 C3 1.378(2) . ? 
C3 F2 1.3463(17) . ? 
C3 C4 1.368(2) . ? 
C4 F3 1.3444(17) . ? 
C4 C5 1.378(2) . ? 
C5 F4 1.334(2) . ? 
C5 C6 1.382(2) . ? 
C6 F5 1.3482(17) . ? 
C7 C8 1.392(2) . ? 
C7 C12 1.405(2) . ? 
C8 F6 1.3542(18) . ? 
C8 C9 1.372(2) . ? 
C9 F7 1.339(2) . ? 
C9 C10 1.385(3) . ? 
C10 F8 1.343(2) . ? 
C10 C11 1.362(3) . ? 
C11 F9 1.344(2) . ? 
C11 C12 1.374(2) . ? 
C12 F10 1.340(2) . ? 
N1 C15 1.4965(19) . ? 
N1 C17 1.499(2) . ? 
N1 C13 1.502(2) . ? 
N1 H1 0.78(2) . ? 
C13 C14 1.498(3) . ? 
C13 H13A 0.95(2) . ? 
C13 H13B 0.95(3) . ? 
C14 H14A 0.89(3) . ? 
C14 H14B 1.04(3) . ? 
C14 H14C 0.92(3) . ? 
C15 C16 1.498(3) . ? 
C15 H15A 0.95(2) . ? 
C15 H15B 1.00(2) . ? 
C16 H16A 0.96(3) . ? 
C16 H16B 1.02(3) . ? 
C16 H16C 0.88(3) . ? 
C17 C18 1.508(3) . ? 
C17 H17A 0.95(2) . ? 
C17 H17B 0.92(2) . ? 
C18 H18A 0.98(2) . ? 
C18 H18B 0.97(3) . ? 
C18 H18C 0.90(3) . ? 
  
loop_ 
 _geom_angle_atom_site_label_1 
 _geom_angle_atom_site_label_2 
 _geom_angle_atom_site_label_3 
 _geom_angle 
 _geom_angle_site_symmetry_1 
 _geom_angle_site_symmetry_3 
 _geom_angle_publ_flag 
O1 Cu1 O1 180.0 . 3_676 ? 
O1 Cu1 O2 84.73(5) . . ? 
O1 Cu1 O2 95.27(5) 3_676 . ? 
O1 Cu1 O2 95.27(5) . 3_676 ? 
O1 Cu1 O2 84.73(5) 3_676 3_676 ? 
O2 Cu1 O2 180.0 . 3_676 ? 
C1 O1 Cu1 125.13(9) . . ? 
C7 O2 Cu1 122.83(9) . . ? 
O1 C1 C6 124.01(14) . . ? 
O1 C1 C2 121.31(14) . . ? 
C6 C1 C2 114.68(13) . . ? 
F1 C2 C3 118.59(13) . . ? 
F1 C2 C1 118.72(14) . . ? 
C3 C2 C1 122.65(14) . . ? 
F2 C3 C4 119.59(14) . . ? 
F2 C3 C2 119.70(15) . . ? 
C4 C3 C2 120.72(14) . . ? 
F3 C4 C3 120.58(15) . . ? 
F3 C4 C5 120.58(16) . . ? 
C3 C4 C5 118.83(14) . . ? 
F4 C5 C4 120.11(15) . . ? 
F4 C5 C6 120.02(16) . . ? 
C4 C5 C6 119.88(15) . . ? 
F5 C6 C5 118.25(15) . . ? 
F5 C6 C1 118.53(14) . . ? 
C5 C6 C1 123.19(15) . . ? 
O2 C7 C8 123.64(14) . . ? 
O2 C7 C12 121.68(15) . . ? 
C8 C7 C12 114.67(14) . . ? 
F6 C8 C9 118.11(16) . . ? 
F6 C8 C7 118.27(14) . . ? 
C9 C8 C7 123.58(15) . . ? 
F7 C9 C8 120.87(17) . . ? 
F7 C9 C10 119.53(17) . . ? 
C8 C9 C10 119.60(17) . . ? 
F8 C10 C11 121.21(18) . . ? 
F8 C10 C9 119.99(19) . . ? 
C11 C10 C9 118.80(16) . . ? 
F9 C11 C10 119.38(16) . . ? 
F9 C11 C12 119.45(17) . . ? 
C10 C11 C12 121.17(16) . . ? 
F10 C12 C11 118.82(14) . . ? 
F10 C12 C7 119.02(15) . . ? 
C11 C12 C7 122.13(16) . . ? 
C15 N1 C17 113.32(13) . . ? 
C15 N1 C13 110.79(13) . . ? 
C17 N1 C13 112.82(14) . . ? 
C15 N1 H1 105.6(13) . . ? 
C17 N1 H1 107.7(14) . . ? 
C13 N1 H1 106.0(13) . . ? 
C14 C13 N1 113.23(18) . . ? 
C14 C13 H13A 113.0(12) . . ? 
N1 C13 H13A 106.9(12) . . ? 
C14 C13 H13B 109.7(16) . . ? 
N1 C13 H13B 103.7(15) . . ? 
H13A C13 H13B 109.8(19) . . ? 
C13 C14 H14A 111.7(19) . . ? 
C13 C14 H14B 108.3(14) . . ? 
H14A C14 H14B 103(2) . . ? 
C13 C14 H14C 111.0(18) . . ? 
H14A C14 H14C 114(3) . . ? 
H14B C14 H14C 109(2) . . ? 
N1 C15 C16 112.44(15) . . ? 
N1 C15 H15A 104.2(12) . . ? 
C16 C15 H15A 112.9(12) . . ? 
N1 C15 H15B 106.4(11) . . ? 
C16 C15 H15B 114.3(11) . . ? 
H15A C15 H15B 106.0(16) . . ? 
C15 C16 H16A 112.9(14) . . ? 
C15 C16 H16B 111.4(16) . . ? 
H16A C16 H16B 110(2) . . ? 
C15 C16 H16C 108.4(19) . . ? 
H16A C16 H16C 107(2) . . ? 
H16B C16 H16C 106(2) . . ? 
N1 C17 C18 114.11(16) . . ? 
N1 C17 H17A 105.8(12) . . ? 
C18 C17 H17A 108.9(12) . . ? 
N1 C17 H17B 105.5(14) . . ? 
C18 C17 H17B 110.6(14) . . ? 
H17A C17 H17B 111.8(18) . . ? 
C17 C18 H18A 111.4(14) . . ? 
C17 C18 H18B 102.6(16) . . ? 
H18A C18 H18B 111(2) . . ? 
C17 C18 H18C 111(2) . . ? 
H18A C18 H18C 109(3) . . ? 
H18B C18 H18C 112(3) . . ? 
  
_diffrn_measured_fraction_theta_max    0.961 
_diffrn_reflns_theta_full              28.26 
_diffrn_measured_fraction_theta_full   0.961 
_refine_diff_density_max    0.495 
_refine_diff_density_min   -0.435 
_refine_diff_density_rms    0.064
#===END 
data_Compound4 
  
_audit_creation_method            SHELXL-97 
# 1. SUBMISSION DETAILS                                                         
_publ_contact_author_name                       'Linda H. Doerrer'              
_publ_contact_author_address                                                    
;                                                                               
Barnard College, Chemistry Department                                           
3009 Broadway                                                                   
New York, NY, 10027                                                             
;                                                                               
_publ_contact_author_phone                      ' 212-854-2074 '                
_publ_contact_author_fax                        ' 212-854-2310 '                
_publ_contact_author_email        ' ldoerrer@barnard.edu '                      
_publ_requested_journal                         'Inorganic Chemistry'           
_publ_requested_coeditor_name                   ' Prof James Mayer '            
#============================================================================== 
# 3. TITLE AND AUTHOR LIST                                                      
_publ_section_title                                                             
;                                                                               
Homoleptic Cobalt and Copper Phenolate A2[M(OAr)4] Compounds
The Effect of Phenoxide Fluorination
;                                                                               
# The loop structure below should contain the names and addresses of all        
# authors, in the required order of publication. Repeat as necessary.           
loop_                                                                           
        _publ_author_name                                                       
        _publ_author_address                                                    
        _publ_author_footnote                                                   
'Buzzeo, Marisa C.'                               #<--'Last name, first name'   
;                                                                               
Barnard College, Chemistry Department                                           
3009 Broadway                                                                   
New York, NY, 10027                                                             
;                                                                               
'Iqbal, Amber H.'                                                               
;                                                                               
Barnard College, Chemistry Department                                           
3009 Broadway                                                                   
New York, NY, 10027                                                             
;                                                                               
'Long, Charli M.'                                                               
;                                                                               
Barnard College, Chemistry Department                                           
3009 Broadway                                                                   
New York, NY, 10027                                                             
;                                                                               
'Millar, David'                                                                 
;                                                                               
Barnard College, Chemistry Department                                           
3009 Broadway                                                                   
New York, NY, 10027                                                             
;                                                                               
'Patel, Sonal'                                                                  
;                                                                               
Barnard College, Chemistry Department                                           
3009 Broadway                                                                   
New York, NY, 10027                                                             
;                                                                               
'Pellow, Matthew A.'                                                            
;                                                                               
Barnard College, Chemistry Department                                           
3009 Broadway                                                                   
New York, NY, 10027                                                             
;                                                                               
'Saddoughi, Sahar A.'                                                           
;                                                                               
Barnard College, Chemistry Department                                           
3009 Broadway                                                                   
New York, NY, 10027                                                             
;                                                                               
'Smenton, Abigail L.'                                                           
;                                                                               
Barnard College, Chemistry Department                                           
3009 Broadway                                                                   
New York, NY, 10027                                                             
;                                                                               
'Turner, John F. C.'                                                            
;                                                                               
Department of Chemistry                                                         
408 Buehler Hall                                                                
University of Tennessee                                                         
Knoxville, TN 37996                                                             
;                                                                               
'Wadhawan, Jay D.'                                                              
;                                                                               
Physical and Theoretical Chemistry Laboratory                                   
University of Oxford                                                            
OXFORD OX1 3QZ, UK                                                              
;                                                                               
'Compton, Richard G.'
;                                                                          
Physical and Theoretical Chemistry Laboratory                                   
University of Oxford                                                            
OXFORD OX1 3QZ, UK                                                              
;                                                                               
'Golen, James A.'                                                               
;                                                                               
Department of Chemistry and Biochemistry                                        
MC 0358                                                                         
University of California, San Diego                                             
9500 Gilman Drive                                                               
La Jolla, CA 92093                                                              
;
;                                                                               
permanent address is the Department of Chemistry & Biochemistry, University of  
Massachusetts Dartmouth, North Dartmouth MA 02747                               
;                                                                               
'Rheingold, Arnold L.'                                                          
;                                                                               
Department of Chemistry and Biochemistry                                        
MC 0358                                                                         
University of California, San Diego                                             
9500 Gilman Drive                                                               
La Jolla, CA 92093                                                              
;                                                                               
#============================================================================== 
_chemical_name_systematic 
; 
 ? 
; 
_chemical_name_common             ? 
_chemical_melting_point           ? 
_chemical_formula_moiety          ? 
_chemical_formula_sum 
 'C56 H72 Cu F20 N2 O4' 
_chemical_formula_weight          1280.70 
  
loop_ 
 _atom_type_symbol 
 _atom_type_description 
 _atom_type_scat_dispersion_real 
 _atom_type_scat_dispersion_imag 
 _atom_type_scat_source 
 'C'  'C'   0.0033   0.0016 
 'International Tables Vol C Tables 4.2.6.8 and 6.1.1.4' 
 'H'  'H'   0.0000   0.0000 
 'International Tables Vol C Tables 4.2.6.8 and 6.1.1.4' 
 'N'  'N'   0.0061   0.0033 
 'International Tables Vol C Tables 4.2.6.8 and 6.1.1.4' 
 'O'  'O'   0.0106   0.0060 
 'International Tables Vol C Tables 4.2.6.8 and 6.1.1.4' 
 'F'  'F'   0.0171   0.0103 
 'International Tables Vol C Tables 4.2.6.8 and 6.1.1.4' 
 'Cu'  'Cu'   0.3201   1.2651 
 'International Tables Vol C Tables 4.2.6.8 and 6.1.1.4' 
  
_symmetry_cell_setting            Orthorhombic 
_symmetry_space_group_name_H-M    Pbca 
  
loop_ 
 _symmetry_equiv_pos_as_xyz 
 'x, y, z' 
 '-x+1/2, -y, z+1/2' 
 '-x, y+1/2, -z+1/2' 
 'x+1/2, -y+1/2, -z' 
 '-x, -y, -z' 
 'x-1/2, y, -z-1/2' 
 'x, -y-1/2, z-1/2' 
 '-x-1/2, y-1/2, z' 
  
_cell_length_a                    15.0601(9) 
_cell_length_b                    17.5377(11) 
_cell_length_c                    22.8468(15) 
_cell_angle_alpha                 90.00 
_cell_angle_beta                  90.00 
_cell_angle_gamma                 90.00 
_cell_volume                      6034.3(7) 
_cell_formula_units_Z             4 
_cell_measurement_temperature     218(2) 
_cell_measurement_reflns_used     6300 
_cell_measurement_theta_min       2.24 
_cell_measurement_theta_max       26.49 
  
_exptl_crystal_description        Block 
_exptl_crystal_colour             Green 
_exptl_crystal_size_max           0.25 
_exptl_crystal_size_mid           0.10 
_exptl_crystal_size_min           0.05 
_exptl_crystal_density_meas       0 
_exptl_crystal_density_diffrn     1.410 
_exptl_crystal_density_method     'not measured' 
_exptl_crystal_F_000              2652 
_exptl_absorpt_coefficient_mu     0.469 
_exptl_absorpt_correction_type    'Multi-scan'
_exptl_absorpt_correction_T_min   0.825 
_exptl_absorpt_correction_T_max   1.000 
_exptl_absorpt_process_details    SADABS 
  
_exptl_special_details 
; 
 ? 
; 
  
_diffrn_ambient_temperature       218(2) 
_diffrn_radiation_wavelength      0.71073 
_diffrn_radiation_type            MoK\a 
_diffrn_radiation_source          'fine-focus sealed tube' 
_diffrn_radiation_monochromator   graphite 
_diffrn_measurement_device_type   'CCD area detector' 
_diffrn_measurement_method        'phi and omega scans' 
_diffrn_detector_area_resol_mean  ? 
_diffrn_standards_number          ? 
_diffrn_standards_interval_count  ? 
_diffrn_standards_interval_time   ? 
_diffrn_standards_decay_%         ? 
_diffrn_reflns_number             36069 
_diffrn_reflns_av_R_equivalents   0.0313 
_diffrn_reflns_av_sigmaI/netI     0.0301 
_diffrn_reflns_limit_h_min        -19 
_diffrn_reflns_limit_h_max        19 
_diffrn_reflns_limit_k_min        -20 
_diffrn_reflns_limit_k_max        22 
_diffrn_reflns_limit_l_min        -29 
_diffrn_reflns_limit_l_max        30 
_diffrn_reflns_theta_min          1.78 
_diffrn_reflns_theta_max          28.32 
_reflns_number_total              7277 
_reflns_number_gt                 4867 
_reflns_threshold_expression      >2sigma(I) 
  
_computing_data_collection        'Bruker SMART' 
_computing_cell_refinement        'Bruker SMART' 
_computing_data_reduction         'Bruker SAINT' 
_computing_structure_solution     'SHELXS-97 (Sheldrick, 1990)' 
_computing_structure_refinement   'SHELXL-97 (Sheldrick, 1997)' 
_computing_molecular_graphics     'Bruker SHELXTL' 
_computing_publication_material   'Bruker SHELXTL' 
  
_refine_special_details 
; 
 Refinement of F^2^ against ALL reflections.  The weighted R-factor wR and 
 goodness of fit S are based on F^2^, conventional R-factors R are based 
 on F, with F set to zero for negative F^2^. The threshold expression of 
 F^2^ > 2sigma(F^2^) is used only for calculating R-factors(gt) etc. and is 
 not relevant to the choice of reflections for refinement.  R-factors based 
 on F^2^ are statistically about twice as large as those based on F, and R- 
 factors based on ALL data will be even larger. 

 The H atoms of the disordered CH2CH3 group in a (nBu4N)+ cation 
 have not been taken in consideration. 
; 
  
_refine_ls_structure_factor_coef  Fsqd 
_refine_ls_matrix_type            full 
_refine_ls_weighting_scheme       calc 
_refine_ls_weighting_details 
 'calc w=1/[\s^2^(Fo^2^)+(0.0988P)^2^+1.1784P] where P=(Fo^2^+2Fc^2^)/3' 
_atom_sites_solution_primary      direct 
_atom_sites_solution_secondary    difmap 
_atom_sites_solution_hydrogens    geom 
_refine_ls_hydrogen_treatment     mixed 
_refine_ls_extinction_method      none 
_refine_ls_extinction_coef        ? 
_refine_ls_number_reflns          7277 
_refine_ls_number_parameters      376 
_refine_ls_number_restraints      0 
_refine_ls_R_factor_all           0.0763 
_refine_ls_R_factor_gt            0.0505 
_refine_ls_wR_factor_ref          0.1722 
_refine_ls_wR_factor_gt           0.1509 
_refine_ls_goodness_of_fit_ref    1.030 
_refine_ls_restrained_S_all       1.030 
_refine_ls_shift/su_max           0.003 
_refine_ls_shift/su_mean          0.000 
  
loop_ 
 _atom_site_label 
 _atom_site_type_symbol 
 _atom_site_fract_x 
 _atom_site_fract_y 
 _atom_site_fract_z 
 _atom_site_U_iso_or_equiv 
 _atom_site_adp_type 
 _atom_site_occupancy 
 _atom_site_symmetry_multiplicity 
 _atom_site_calc_flag 
 _atom_site_refinement_flags 
 _atom_site_disorder_assembly 
 _atom_site_disorder_group 
Cu1 Cu 0.0000 0.0000 0.5000 0.04710(14) Uani 1 2 d S . . 
O1 O 0.10676(11) 0.03385(12) 0.46171(7) 0.0690(5) Uani 1 1 d . . . 
O2 O -0.07511(10) 0.03483(9) 0.43693(7) 0.0563(4) Uani 1 1 d . . . 
C1 C 0.11831(13) 0.03930(13) 0.40557(10) 0.0505(5) Uani 1 1 d . . . 
C2 C 0.09484(16) -0.01674(15) 0.36556(14) 0.0643(7) Uani 1 1 d . . . 
C3 C 0.1057(2) -0.0093(2) 0.30645(15) 0.0802(9) Uani 1 1 d . . . 
C4 C 0.1427(2) 0.0557(2) 0.28376(12) 0.0851(10) Uani 1 1 d . . . 
C5 C 0.16757(17) 0.11219(17) 0.32104(12) 0.0679(7) Uani 1 1 d . . . 
C6 C 0.15602(14) 0.10355(13) 0.37995(10) 0.0527(5) Uani 1 1 d . . . 
C7 C -0.06707(12) 0.09925(12) 0.40930(9) 0.0445(4) Uani 1 1 d . . . 
C8 C -0.09178(14) 0.10673(14) 0.35062(10) 0.0535(5) Uani 1 1 d . . . 
C9 C -0.08407(17) 0.17348(17) 0.32044(10) 0.0645(7) Uani 1 1 d . . . 
C10 C -0.05010(17) 0.23724(16) 0.34671(13) 0.0676(7) Uani 1 1 d . . . 
C11 C -0.02560(16) 0.23295(14) 0.40359(13) 0.0613(6) Uani 1 1 d . . . 
C12 C -0.03482(14) 0.16622(14) 0.43400(9) 0.0504(5) Uani 1 1 d . . . 
F1 F 0.05844(13) -0.08137(9) 0.38738(11) 0.1033(7) Uani 1 1 d . . . 
F2 F 0.08087(16) -0.06648(16) 0.27082(11) 0.1390(10) Uani 1 1 d . . . 
F3 F 0.15473(18) 0.06414(19) 0.22533(8) 0.1410(10) Uani 1 1 d . . . 
F4 F 0.20342(14) 0.17637(12) 0.29955(9) 0.1103(7) Uani 1 1 d . . . 
F5 F 0.17976(11) 0.16217(9) 0.41463(7) 0.0793(5) Uani 1 1 d . . . 
F6 F -0.12464(13) 0.04526(10) 0.32284(7) 0.0829(5) Uani 1 1 d . . . 
F7 F -0.11005(16) 0.17738(13) 0.26432(7) 0.1105(7) Uani 1 1 d . . . 
F8 F -0.04356(14) 0.30347(11) 0.31674(10) 0.1091(7) Uani 1 1 d . . . 
F9 F 0.00617(12) 0.29531(10) 0.43127(11) 0.0958(6) Uani 1 1 d . . . 
F10 F -0.01151(11) 0.16517(11) 0.49130(6) 0.0739(5) Uani 1 1 d . . . 
N1 N -0.16373(12) -0.20871(11) 0.38137(8) 0.0529(4) Uani 1 1 d . . . 
C13 C -0.18162(17) -0.13406(14) 0.41290(11) 0.0616(6) Uani 1 1 d . . . 
H13A H -0.1452 -0.0940 0.3951 0.074 Uiso 1 1 calc R . . 
H13B H -0.1630 -0.1393 0.4538 0.074 Uiso 1 1 calc R . . 
C14 C -0.2784(2) -0.1092(2) 0.41145(17) 0.0922(10) Uani 1 1 d . . . 
H14A H -0.2968 -0.1030 0.3706 0.111 Uiso 1 1 calc R . . 
H14B H -0.3150 -0.1496 0.4287 0.111 Uiso 1 1 calc R . . 
C15 C -0.2953(2) -0.0381(2) 0.4427(2) 0.1075(13) Uani 1 1 d . . . 
H15A H -0.2587 0.0023 0.4254 0.129 Uiso 1 1 calc R . . 
H15B H -0.2769 -0.0442 0.4836 0.129 Uiso 1 1 calc R . . 
C16 C -0.3905(3) -0.0136(2) 0.4412(3) 0.1272(17) Uani 1 1 d . . . 
H16A H -0.3970 0.0343 0.4620 0.191 Uiso 1 1 calc R . . 
H16B H -0.4270 -0.0522 0.4598 0.191 Uiso 1 1 calc R . . 
H16C H -0.4092 -0.0071 0.4009 0.191 Uiso 1 1 calc R . . 
C17 C -0.21637(16) -0.27274(15) 0.40918(11) 0.0604(6) Uani 1 1 d . . . 
H17A H -0.2091 -0.3188 0.3854 0.072 Uiso 1 1 calc R . . 
H17B H -0.2794 -0.2590 0.4086 0.072 Uiso 1 1 calc R . . 
C18 C -0.18989(18) -0.29101(17) 0.47171(12) 0.0711(7) Uani 1 1 d . . . 
H18A H -0.1325 -0.3174 0.4716 0.085 Uiso 1 1 calc R . . 
H18B H -0.1827 -0.2433 0.4935 0.085 Uiso 1 1 calc R . . 
C19 C -0.2570(2) -0.3397(2) 0.50198(13) 0.0842(9) Uani 1 1 d . . . 
H19A H -0.2689 -0.3848 0.4779 0.101 Uiso 1 1 calc R . . 
H19B H -0.3126 -0.3111 0.5057 0.101 Uiso 1 1 calc R . . 
C20 C -0.2275(3) -0.3648(2) 0.56138(15) 0.1095(13) Uani 1 1 d . . . 
H20A H -0.2734 -0.3959 0.5791 0.164 Uiso 1 1 calc R . . 
H20B H -0.2166 -0.3205 0.5857 0.164 Uiso 1 1 calc R . . 
H20C H -0.1733 -0.3944 0.5579 0.164 Uiso 1 1 calc R . . 
C21 C -0.19073(18) -0.20366(15) 0.31749(11) 0.0626(6) Uani 1 1 d . . . 
H21A H -0.1783 -0.2527 0.2987 0.075 Uiso 1 1 calc R . . 
H21B H -0.2549 -0.1950 0.3154 0.075 Uiso 1 1 calc R . . 
C22 C -0.1445(2) -0.1416(2) 0.28356(12) 0.0813(8) Uani 1 1 d . . . 
H22A H -0.1456 -0.0946 0.3067 0.098 Uiso 1 1 calc R . . 
H22B H -0.0821 -0.1561 0.2782 0.098 Uiso 1 1 calc R . . 
C23 C -0.1842(3) -0.1259(2) 0.22522(15) 0.1018(11) Uani 1 1 d . . . 
H23A H -0.2477 -0.1152 0.2302 0.122 Uiso 1 1 calc R . . 
H23B H -0.1787 -0.1716 0.2008 0.122 Uiso 1 1 calc R . . 
C24 C -0.1417(3) -0.0602(2) 0.19430(15) 0.1027(12) Uani 1 1 d . . . 
H24A H -0.1709 -0.0521 0.1570 0.154 Uiso 1 1 calc R . . 
H24B H -0.0794 -0.0713 0.1877 0.154 Uiso 1 1 calc R . . 
H24C H -0.1471 -0.0147 0.2181 0.154 Uiso 1 1 calc R . . 
C25 C -0.06486(15) -0.22455(14) 0.38648(10) 0.0566(6) Uani 1 1 d . . . 
H25A H -0.0327 -0.1821 0.3683 0.068 Uiso 1 1 calc R . . 
H25B H -0.0491 -0.2251 0.4281 0.068 Uiso 1 1 calc R . . 
C26 C -0.0325(2) -0.29796(18) 0.35925(14) 0.0757(8) Uani 1 1 d . . . 
H26A H -0.0383 -0.2951 0.3166 0.091 Uiso 1 1 calc R . . 
H26B H -0.0688 -0.3407 0.3732 0.091 Uiso 1 1 calc R . . 
C27 C 0.0651(2) -0.3111(2) 0.37585(19) 0.1093(13) Uani 1 1 d . . . 
C28 C 0.0821(5) -0.3396(5) 0.4281(4) 0.112(3) Uiso 0.572(9) 1 d P . . 
C28A C 0.0937(5) -0.3904(5) 0.3730(4) 0.088(3) Uiso 0.428(9) 1 d P . . 
  
loop_ 
 _atom_site_aniso_label 
 _atom_site_aniso_U_11 
 _atom_site_aniso_U_22 
 _atom_site_aniso_U_33 
 _atom_site_aniso_U_23 
 _atom_site_aniso_U_13 
 _atom_site_aniso_U_12 
Cu1 0.0468(2) 0.0518(3) 0.0427(2) 0.01206(16) -0.00446(14) -0.00560(14) 
O1 0.0539(9) 0.1031(14) 0.0499(9) 0.0217(9) -0.0040(7) -0.0174(9) 
O2 0.0555(8) 0.0589(10) 0.0545(9) 0.0159(8) -0.0115(7) -0.0089(7) 
C1 0.0439(10) 0.0569(13) 0.0507(12) 0.0094(10) -0.0015(9) -0.0004(9) 
C2 0.0572(13) 0.0526(14) 0.0831(19) 0.0010(13) -0.0063(12) -0.0001(10) 
C3 0.0714(17) 0.091(2) 0.078(2) -0.0363(18) -0.0104(15) 0.0117(15) 
C4 0.0801(18) 0.132(3) 0.0435(14) -0.0017(17) 0.0044(13) 0.0263(19) 
C5 0.0686(14) 0.0727(17) 0.0624(16) 0.0213(14) 0.0146(12) 0.0116(13) 
C6 0.0513(11) 0.0528(13) 0.0539(13) 0.0018(11) 0.0063(9) -0.0004(9) 
C7 0.0415(9) 0.0530(12) 0.0390(10) 0.0055(9) 0.0004(8) 0.0007(8) 
C8 0.0586(12) 0.0605(14) 0.0413(11) -0.0046(10) -0.0036(9) 0.0057(10) 
C9 0.0728(15) 0.0822(19) 0.0385(12) 0.0161(12) 0.0031(10) 0.0140(13) 
C10 0.0625(13) 0.0613(16) 0.0789(18) 0.0286(14) 0.0145(13) 0.0094(12) 
C11 0.0531(11) 0.0491(14) 0.0816(18) 0.0008(13) 0.0005(12) 0.0000(10) 
C12 0.0494(10) 0.0594(14) 0.0423(11) -0.0014(10) -0.0038(9) 0.0001(9) 
F1 0.0892(12) 0.0576(10) 0.163(2) 0.0048(11) -0.0069(12) -0.0191(8) 
F2 0.1172(17) 0.162(2) 0.138(2) -0.0951(18) -0.0189(14) 0.0066(15) 
F3 0.1379(19) 0.239(3) 0.0464(10) 0.0070(14) 0.0096(11) 0.0397(19) 
F4 0.1174(15) 0.1023(14) 0.1112(16) 0.0564(12) 0.0349(12) -0.0001(11) 
F5 0.0797(10) 0.0718(10) 0.0865(11) -0.0187(9) 0.0166(8) -0.0197(8) 
F6 0.1075(13) 0.0813(12) 0.0599(9) -0.0160(8) -0.0278(9) 0.0005(9) 
F7 0.1425(17) 0.1447(19) 0.0444(9) 0.0300(10) -0.0090(10) 0.0196(14) 
F8 0.1075(14) 0.0867(13) 0.1330(17) 0.0630(12) 0.0163(13) 0.0083(10) 
F9 0.0882(12) 0.0562(10) 0.1429(18) -0.0098(11) -0.0140(10) -0.0098(8) 
F10 0.0860(11) 0.0859(12) 0.0499(8) -0.0112(7) -0.0196(7) -0.0032(8) 
N1 0.0568(10) 0.0537(11) 0.0481(10) -0.0089(8) -0.0076(8) -0.0046(8) 
C13 0.0714(14) 0.0582(14) 0.0553(14) -0.0146(12) -0.0026(11) -0.0009(11) 
C14 0.0792(19) 0.085(2) 0.112(3) -0.027(2) -0.0056(17) 0.0142(16) 
C15 0.082(2) 0.097(3) 0.144(3) -0.041(2) 0.002(2) 0.0107(18) 
C16 0.091(3) 0.099(3) 0.191(5) -0.027(3) 0.010(3) 0.023(2) 
C17 0.0570(12) 0.0620(14) 0.0622(15) -0.0082(12) -0.0081(11) -0.0100(10) 
C18 0.0731(15) 0.0787(18) 0.0615(16) 0.0034(14) -0.0112(13) -0.0212(13) 
C19 0.0734(18) 0.097(2) 0.082(2) 0.0117(17) -0.0089(14) -0.0281(17) 
C20 0.108(3) 0.136(3) 0.085(2) 0.035(2) -0.0119(19) -0.057(2) 
C21 0.0692(14) 0.0678(16) 0.0508(13) -0.0111(11) -0.0136(11) 0.0003(12) 
C22 0.097(2) 0.093(2) 0.0536(16) 0.0042(15) -0.0107(14) -0.0077(17) 
C23 0.138(3) 0.089(2) 0.078(2) 0.0131(19) -0.035(2) -0.002(2) 
C24 0.152(4) 0.092(2) 0.064(2) 0.0078(18) -0.022(2) 0.008(2) 
C25 0.0526(11) 0.0650(15) 0.0521(13) -0.0069(11) -0.0069(10) -0.0061(10) 
C26 0.0708(15) 0.078(2) 0.0781(19) -0.0077(15) -0.0042(14) 0.0092(14) 
C27 0.086(2) 0.120(3) 0.122(3) -0.001(2) -0.012(2) 0.038(2) 
  
_geom_special_details 
; 
 All esds (except the esd in the dihedral angle between two l.s. planes) 
 are estimated using the full covariance matrix.  The cell esds are taken 
 into account individually in the estimation of esds in distances, angles 
 and torsion angles; correlations between esds in cell parameters are only 
 used when they are defined by crystal symmetry.  An approximate (isotropic) 
 treatment of cell esds is used for estimating esds involving l.s. planes. 
; 
  
loop_ 
 _geom_bond_atom_site_label_1 
 _geom_bond_atom_site_label_2 
 _geom_bond_distance 
 _geom_bond_site_symmetry_2 
 _geom_bond_publ_flag 
Cu1 O1 1.9243(16) . ? 
Cu1 O1 1.9243(16) 5_556 ? 
Cu1 O2 1.9311(15) . ? 
Cu1 O2 1.9311(15) 5_556 ? 
O1 C1 1.298(3) . ? 
O2 C7 1.300(3) . ? 
C1 C2 1.388(4) . ? 
C1 C6 1.391(3) . ? 
C2 F1 1.354(3) . ? 
C2 C3 1.366(4) . ? 
C3 F2 1.344(3) . ? 
C3 C4 1.371(5) . ? 
C4 F3 1.355(3) . ? 
C4 C5 1.359(5) . ? 
C5 F4 1.341(3) . ? 
C5 C6 1.366(3) . ? 
C6 F5 1.346(3) . ? 
C7 C12 1.391(3) . ? 
C7 C8 1.397(3) . ? 
C8 F6 1.345(3) . ? 
C8 C9 1.364(4) . ? 
C9 F7 1.342(3) . ? 
C9 C10 1.368(4) . ? 
C10 F8 1.352(3) . ? 
C10 C11 1.353(4) . ? 
C11 F9 1.351(3) . ? 
C11 C12 1.368(3) . ? 
C12 F10 1.355(3) . ? 
N1 C17 1.514(3) . ? 
N1 C21 1.518(3) . ? 
N1 C13 1.518(3) . ? 
N1 C25 1.519(3) . ? 
C13 C14 1.522(4) . ? 
C14 C15 1.459(4) . ? 
C15 C16 1.498(5) . ? 
C17 C18 1.517(3) . ? 
C18 C19 1.493(4) . ? 
C19 C20 1.494(4) . ? 
C21 C22 1.507(4) . ? 
C22 C23 1.487(4) . ? 
C23 C24 1.496(5) . ? 
C25 C26 1.511(4) . ? 
C26 C27 1.536(5) . ? 
C27 C28 1.319(8) . ? 
C27 C28A 1.457(9) . ? 
C28 C28A 1.552(11) . ? 
  
loop_ 
 _geom_angle_atom_site_label_1 
 _geom_angle_atom_site_label_2 
 _geom_angle_atom_site_label_3 
 _geom_angle 
 _geom_angle_site_symmetry_1 
 _geom_angle_site_symmetry_3 
 _geom_angle_publ_flag 
O1 Cu1 O1 180.00(5) . 5_556 ? 
O1 Cu1 O2 93.02(7) . . ? 
O1 Cu1 O2 86.98(7) 5_556 . ? 
O1 Cu1 O2 86.98(7) . 5_556 ? 
O1 Cu1 O2 93.02(7) 5_556 5_556 ? 
O2 Cu1 O2 180.00(6) . 5_556 ? 
C1 O1 Cu1 125.73(14) . . ? 
C7 O2 Cu1 125.65(13) . . ? 
O1 C1 C2 124.4(2) . . ? 
O1 C1 C6 122.0(2) . . ? 
C2 C1 C6 113.6(2) . . ? 
F1 C2 C3 119.5(3) . . ? 
F1 C2 C1 116.9(3) . . ? 
C3 C2 C1 123.6(3) . . ? 
F2 C3 C2 119.6(3) . . ? 
F2 C3 C4 120.3(3) . . ? 
C2 C3 C4 120.1(3) . . ? 
F3 C4 C5 120.1(4) . . ? 
F3 C4 C3 121.2(4) . . ? 
C5 C4 C3 118.8(3) . . ? 
F4 C5 C4 119.5(3) . . ? 
F4 C5 C6 120.3(3) . . ? 
C4 C5 C6 120.1(3) . . ? 
F5 C6 C5 117.5(2) . . ? 
F5 C6 C1 118.7(2) . . ? 
C5 C6 C1 123.8(2) . . ? 
O2 C7 C12 124.72(19) . . ? 
O2 C7 C8 121.5(2) . . ? 
C12 C7 C8 113.8(2) . . ? 
F6 C8 C9 118.7(2) . . ? 
F6 C8 C7 118.4(2) . . ? 
C9 C8 C7 122.9(2) . . ? 
F7 C9 C8 120.1(3) . . ? 
F7 C9 C10 119.1(3) . . ? 
C8 C9 C10 120.8(2) . . ? 
F8 C10 C11 121.0(3) . . ? 
F8 C10 C9 120.5(3) . . ? 
C11 C10 C9 118.5(2) . . ? 
F9 C11 C10 120.1(3) . . ? 
F9 C11 C12 119.4(3) . . ? 
C10 C11 C12 120.5(2) . . ? 
F10 C12 C11 118.4(2) . . ? 
F10 C12 C7 118.1(2) . . ? 
C11 C12 C7 123.5(2) . . ? 
C17 N1 C21 107.85(17) . . ? 
C17 N1 C13 110.33(19) . . ? 
C21 N1 C13 111.00(19) . . ? 
C17 N1 C25 110.19(18) . . ? 
C21 N1 C25 110.32(18) . . ? 
C13 N1 C25 107.17(17) . . ? 
N1 C13 C14 114.0(2) . . ? 
C15 C14 C13 113.6(3) . . ? 
C14 C15 C16 113.6(3) . . ? 
N1 C17 C18 114.46(18) . . ? 
C19 C18 C17 112.3(2) . . ? 
C18 C19 C20 112.8(2) . . ? 
C22 C21 N1 114.4(2) . . ? 
C23 C22 C21 114.1(3) . . ? 
C22 C23 C24 113.2(3) . . ? 
C26 C25 N1 116.1(2) . . ? 
C25 C26 C27 109.6(3) . . ? 
C28 C27 C28A 67.7(5) . . ? 
C28 C27 C26 117.8(5) . . ? 
C28A C27 C26 114.6(4) . . ? 
C27 C28 C28A 60.4(5) . . ? 
C27 C28A C28 51.9(4) . . ? 
  
_diffrn_measured_fraction_theta_max    0.968 
_diffrn_reflns_theta_full              28.32 
_diffrn_measured_fraction_theta_full   0.968 
_refine_diff_density_max    0.568 
_refine_diff_density_min   -0.289 
_refine_diff_density_rms    0.053
#===END 
data_Copmound7a 
  
_audit_creation_method            SHELXL-97 
# 1. SUBMISSION DETAILS                                                         
_publ_contact_author_name                       'Linda H. Doerrer'              
_publ_contact_author_address                                                    
;                                                                               
Barnard College, Chemistry Department                                           
3009 Broadway                                                                   
New York, NY, 10027                                                             
;                                                                               
_publ_contact_author_phone                      ' 212-854-2074 '                
_publ_contact_author_fax                        ' 212-854-2310 '                
_publ_contact_author_email        ' ldoerrer@barnard.edu '                      
_publ_requested_journal                         'Inorganic Chemistry'           
_publ_requested_coeditor_name                   ' Prof James Mayer '            
#============================================================================== 
# 3. TITLE AND AUTHOR LIST                                                      
_publ_section_title                                                             
;                                                                               
Homoleptic Cobalt and Copper Phenolate A2[M(OAr)4] Compounds
The Effect of Phenoxide Fluorination
;                                                                               
# The loop structure below should contain the names and addresses of all        
# authors, in the required order of publication. Repeat as necessary.           
loop_                                                                           
        _publ_author_name                                                       
        _publ_author_address                                                    
        _publ_author_footnote                                                   
'Buzzeo, Marisa C.'                               #<--'Last name, first name'   
;                                                                               
Barnard College, Chemistry Department                                           
3009 Broadway                                                                   
New York, NY, 10027                                                             
;                                                                               
'Iqbal, Amber H.'                                                               
;                                                                               
Barnard College, Chemistry Department                                           
3009 Broadway                                                                   
New York, NY, 10027                                                             
;                                                                               
'Long, Charli M.'                                                               
;                                                                               
Barnard College, Chemistry Department                                           
3009 Broadway                                                                   
New York, NY, 10027                                                             
;                                                                               
'Millar, David'                                                                 
;                                                                               
Barnard College, Chemistry Department                                           
3009 Broadway                                                                   
New York, NY, 10027                                                             
;                                                                               
'Patel, Sonal'                                                                  
;                                                                               
Barnard College, Chemistry Department                                           
3009 Broadway                                                                   
New York, NY, 10027                                                             
;                                                                               
'Pellow, Matthew A.'                                                            
;                                                                               
Barnard College, Chemistry Department                                           
3009 Broadway                                                                   
New York, NY, 10027                                                             
;                                                                               
'Saddoughi, Sahar A.'                                                           
;                                                                               
Barnard College, Chemistry Department                                           
3009 Broadway                                                                   
New York, NY, 10027                                                             
;                                                                               
'Smenton, Abigail L.'                                                           
;                                                                               
Barnard College, Chemistry Department                                           
3009 Broadway                                                                   
New York, NY, 10027                                                             
;                                                                               
'Turner, John F. C.'                                                            
;                                                                               
Department of Chemistry                                                         
408 Buehler Hall                                                                
University of Tennessee                                                         
Knoxville, TN 37996                                                             
;                                                                               
'Wadhawan, Jay D.'                                                              
;                                                                               
Physical and Theoretical Chemistry Laboratory                                   
University of Oxford                                                            
OXFORD OX1 3QZ, UK                                                              
;                                                                               
'Compton, Richard G.'
;                                                                          
Physical and Theoretical Chemistry Laboratory                                   
University of Oxford                                                            
OXFORD OX1 3QZ, UK                                                              
;                                                                               
'Golen, James A.'                                                               
;                                                                               
Department of Chemistry and Biochemistry                                        
MC 0358                                                                         
University of California, San Diego                                             
9500 Gilman Drive                                                               
La Jolla, CA 92093                                                              
;
;                                                                               
permanent address is the Department of Chemistry & Biochemistry, University of  
Massachusetts Dartmouth, North Dartmouth MA 02747                               
;                                                                               
'Rheingold, Arnold L.'                                                          
;                                                                               
Department of Chemistry and Biochemistry                                        
MC 0358                                                                         
University of California, San Diego                                             
9500 Gilman Drive                                                               
La Jolla, CA 92093                                                              
;                                                                               
#============================================================================== 
_chemical_name_systematic 
; 
 ? 
; 
_chemical_name_common             ? 
_chemical_melting_point           ? 
_chemical_formula_moiety          ? 
_chemical_formula_sum 
 'C56 H64 Co F20 K2 O18' 
_chemical_formula_weight          1542.20 
 
loop_ 
 _atom_type_symbol 
 _atom_type_description 
 _atom_type_scat_dispersion_real 
 _atom_type_scat_dispersion_imag 
 _atom_type_scat_source 
 'C'  'C'   0.0033   0.0016 
 'International Tables Vol C Tables 4.2.6.8 and 6.1.1.4' 
 'H'  'H'   0.0000   0.0000 
 'International Tables Vol C Tables 4.2.6.8 and 6.1.1.4' 
 'O'  'O'   0.0106   0.0060 
 'International Tables Vol C Tables 4.2.6.8 and 6.1.1.4' 
 'F'  'F'   0.0171   0.0103 
 'International Tables Vol C Tables 4.2.6.8 and 6.1.1.4' 
 'K'  'K'   0.2009   0.2494 
 'International Tables Vol C Tables 4.2.6.8 and 6.1.1.4' 
 'Co'  'Co'   0.3494   0.9721 
 'International Tables Vol C Tables 4.2.6.8 and 6.1.1.4' 
 
_symmetry_cell_setting            Monoclinic 
_symmetry_space_group_name_H-M    C2/c
 
loop_ 
 _symmetry_equiv_pos_as_xyz 
 'x, y, z' 
 '-x, y, -z+1/2' 
 'x+1/2, y+1/2, z' 
 '-x+1/2, y+1/2, -z+1/2' 
 '-x, -y, -z' 
 'x, -y, z-1/2' 
 '-x+1/2, -y+1/2, -z' 
 'x+1/2, -y+1/2, z-1/2' 
 
_cell_length_a                    22.0161(10) 
_cell_length_b                    16.0513(7) 
_cell_length_c                    19.1081(9) 
_cell_angle_alpha                 90.00 
_cell_angle_beta                  101.7300(10) 
_cell_angle_gamma                 90.00 
_cell_volume                      6611.5(5) 
_cell_formula_units_Z             4 
_cell_measurement_temperature     218(2) 
_cell_measurement_reflns_used     ? 
_cell_measurement_theta_min       ? 
_cell_measurement_theta_max       ? 
 
_exptl_crystal_description        Block
_exptl_crystal_colour             Green
_exptl_crystal_size_max           0.30 
_exptl_crystal_size_mid           0.30 
_exptl_crystal_size_min           0.20 
_exptl_crystal_density_meas       ? 
_exptl_crystal_density_diffrn     1.549 
_exptl_crystal_density_method     'not measured' 
_exptl_crystal_F_000              3156 
_exptl_absorpt_coefficient_mu     0.509 
_exptl_absorpt_correction_type    'Multi-scan' 
_exptl_absorpt_correction_T_min   0.8623 
_exptl_absorpt_correction_T_max   0.9051 
_exptl_absorpt_process_details    SADABS
 
_exptl_special_details 
; 
 ? 
; 
 
_diffrn_ambient_temperature       218(2) 
_diffrn_radiation_wavelength      0.71073 
_diffrn_radiation_type            MoK\a 
_diffrn_radiation_source          'fine-focus sealed tube' 
_diffrn_radiation_monochromator   graphite 
_diffrn_measurement_device_type   ? 
_diffrn_measurement_method        ? 
_diffrn_detector_area_resol_mean  ? 
_diffrn_standards_number          ? 
_diffrn_standards_interval_count  ? 
_diffrn_standards_interval_time   ? 
_diffrn_standards_decay_%         ? 
_diffrn_reflns_number             21480 
_diffrn_reflns_av_R_equivalents   0.0358 
_diffrn_reflns_av_sigmaI/netI     0.0380 
_diffrn_reflns_limit_h_min        -27 
_diffrn_reflns_limit_h_max        27 
_diffrn_reflns_limit_k_min        -19 
_diffrn_reflns_limit_k_max        19 
_diffrn_reflns_limit_l_min        -23 
_diffrn_reflns_limit_l_max        22 
_diffrn_reflns_theta_min          1.58 
_diffrn_reflns_theta_max          26.00 
_reflns_number_total              6485 
_reflns_number_gt                 4961 
_reflns_threshold_expression      >2sigma(I) 
 
_computing_data_collection        ? 
_computing_cell_refinement        ? 
_computing_data_reduction         ? 
_computing_structure_solution     'SHELXS-97 (Sheldrick, 1990)' 
_computing_structure_refinement   'SHELXL-97 (Sheldrick, 1997)' 
_computing_molecular_graphics     ? 
_computing_publication_material   ? 
 
_refine_special_details 
; 
 Refinement of F^2^ against ALL reflections.  The weighted R-factor wR and 
 goodness of fit S are based on F^2^, conventional R-factors R are based 
 on F, with F set to zero for negative F^2^. The threshold expression of 
 F^2^ > 2sigma(F^2^) is used only for calculating R-factors(gt) etc. and is 
 not relevant to the choice of reflections for refinement.  R-factors based 
 on F^2^ are statistically about twice as large as those based on F, and R- 
 factors based on ALL data will be even larger. 

 The four H atoms at the two C atoms (C18 and C19) bonded to 
 the disordered O atoms (O6 and O6') have not been taken into consideration
 in the refenement. 

; 
 
_refine_ls_structure_factor_coef  Fsqd  
_refine_ls_matrix_type            full 
_refine_ls_weighting_scheme       calc  
_refine_ls_weighting_details 
 'calc w=1/[\s^2^(Fo^2^)+(0.0800P)^2^+12.0000P] where P=(Fo^2^+2Fc^2^)/3' 
_atom_sites_solution_primary      direct 
_atom_sites_solution_secondary    difmap 
_atom_sites_solution_hydrogens    geom 
_refine_ls_hydrogen_treatment     mixed 
_refine_ls_extinction_method      none 
_refine_ls_extinction_coef        ? 
_refine_ls_number_reflns          6485 
_refine_ls_number_parameters      443 
_refine_ls_number_restraints      0 
_refine_ls_R_factor_all           0.0821 
_refine_ls_R_factor_gt            0.0635 
_refine_ls_wR_factor_ref          0.1721 
_refine_ls_wR_factor_gt           0.1601 
_refine_ls_goodness_of_fit_ref    1.054 
_refine_ls_restrained_S_all       1.054 
_refine_ls_shift/su_max           0.004 
_refine_ls_shift/su_mean          0.000 
 
loop_ 
 _atom_site_label 
 _atom_site_type_symbol 
 _atom_site_fract_x 
 _atom_site_fract_y 
 _atom_site_fract_z 
 _atom_site_U_iso_or_equiv 
 _atom_site_adp_type 
 _atom_site_occupancy 
 _atom_site_symmetry_multiplicity 
 _atom_site_calc_flag 
 _atom_site_refinement_flags 
 _atom_site_disorder_assembly 
 _atom_site_disorder_group 
Co1 Co 0.0000 0.27588(4) 0.7500 0.03925(19) Uani 1 2 d S . . 
K1 K 0.09702(3) 0.28313(5) 0.93026(4) 0.0433(2) Uani 1 1 d . . . 
F2 F -0.02865(12) 0.46977(18) 0.66885(15) 0.0801(8) Uani 1 1 d . A . 
F3 F -0.07750(17) 0.62071(18) 0.6849(2) 0.1158(12) Uani 1 1 d . . . 
F4 F -0.17943(17) 0.63526(17) 0.7450(2) 0.1093(11) Uani 1 1 d . A . 
F5 F -0.22929(12) 0.49595(18) 0.79044(15) 0.0813(8) Uani 1 1 d . . . 
F6 F -0.18076(10) 0.34584(14) 0.77593(13) 0.0639(6) Uani 1 1 d . A . 
F8 F 0.05856(15) 0.0600(2) 0.68701(16) 0.0930(8) Uani 1 1 d . A . 
F9 F 0.16405(15) 0.02282(19) 0.64382(18) 0.1062(11) Uani 1 1 d . . . 
F10 F 0.22160(14) 0.1383(3) 0.57595(19) 0.1168(12) Uani 1 1 d . A . 
F11 F 0.17080(19) 0.2927(2) 0.5531(2) 0.1236(12) Uani 1 1 d . . . 
F12 F 0.06625(16) 0.33101(18) 0.59844(19) 0.1104(12) Uani 1 1 d . A . 
O1 O -0.07914(10) 0.32876(15) 0.71310(13) 0.0516(6) Uani 1 1 d . . . 
O2 O 0.00651(12) 0.2167(2) 0.66382(16) 0.0800(10) Uani 1 1 d . . . 
O3 O 0.0684(2) 0.4132(3) 1.0207(3) 0.1236(16) Uani 1 1 d . A . 
O4 O 0.04020(19) 0.2437(3) 1.0486(2) 0.1009(12) Uani 1 1 d . A . 
O5 O 0.08425(19) 0.1186(2) 0.97519(18) 0.0933(11) Uani 1 1 d . A . 
O6 O 0.16320(18) 0.1342(3) 0.8924(2) 0.0601(17) Uani 0.718(12) 1 d P A 1 
O6' O 0.1419(5) 0.1575(7) 0.8490(7) 0.059(4) Uiso 0.282(12) 1 d P A 2 
O7 O 0.21414(11) 0.29637(18) 0.89003(14) 0.0577(7) Uani 1 1 d . A . 
O8 O 0.18639(15) 0.41153(17) 0.98570(16) 0.0711(8) Uani 1 1 d . A . 
C1 C -0.10204(15) 0.4023(2) 0.72236(17) 0.0427(8) Uani 1 1 d . . . 
C2 C -0.07835(17) 0.4752(2) 0.6994(2) 0.0525(9) Uani 1 1 d . . . 
C3 C -0.1036(2) 0.5529(3) 0.7071(3) 0.0701(12) Uani 1 1 d . A . 
C4 C -0.1545(2) 0.5601(3) 0.7369(2) 0.0673(11) Uani 1 1 d . . . 
C5 C -0.17953(17) 0.4898(3) 0.7599(2) 0.0552(9) Uani 1 1 d . A . 
C6 C -0.15396(16) 0.4131(2) 0.75303(18) 0.0451(8) Uani 1 1 d . . . 
C7 C 0.05809(18) 0.1972(3) 0.6439(2) 0.0611(11) Uani 1 1 d . A . 
C8 C 0.08585(19) 0.1192(3) 0.6540(2) 0.0621(11) Uani 1 1 d . . . 
C9 C 0.1398(2) 0.1002(3) 0.6314(2) 0.0678(12) Uani 1 1 d . A . 
C10 C 0.1687(2) 0.1578(4) 0.5979(3) 0.0743(13) Uani 1 1 d . . . 
C11 C 0.1427(2) 0.2348(3) 0.5861(3) 0.0778(13) Uani 1 1 d . A . 
C12 C 0.0897(2) 0.2539(3) 0.6094(3) 0.0714(13) Uani 1 1 d . . . 
C13 C 0.0249(5) 0.3839(6) 1.0650(5) 0.165(4) Uani 1 1 d . . . 
H13A H 0.0242 0.4250 1.1027 0.198 Uiso 1 1 calc R A . 
H13B H -0.0169 0.3821 1.0349 0.198 Uiso 1 1 calc R . . 
C14 C 0.0377(4) 0.3060(7) 1.0970(4) 0.141(3) Uani 1 1 d . A . 
H14A H 0.0776 0.3087 1.1309 0.170 Uiso 1 1 calc R . . 
H14B H 0.0057 0.2925 1.1240 0.170 Uiso 1 1 calc R . . 
C15 C 0.0507(3) 0.1632(6) 1.0752(4) 0.122(3) Uani 1 1 d . . . 
H15A H 0.0198 0.1504 1.1040 0.147 Uiso 1 1 calc R A . 
H15B H 0.0916 0.1614 1.1071 0.147 Uiso 1 1 calc R . . 
C16 C 0.0482(3) 0.1007(4) 1.0228(4) 0.100(2) Uani 1 1 d . A . 
H16A H 0.0617 0.0477 1.0464 0.120 Uiso 1 1 calc R . . 
H16B H 0.0051 0.0939 0.9972 0.120 Uiso 1 1 calc R . . 
C17 C 0.0935(2) 0.0537(3) 0.9277(4) 0.100(2) Uani 1 1 d . . . 
H17A H 0.1209 0.0116 0.9547 0.120 Uiso 1 1 calc R A . 
H17B H 0.0535 0.0269 0.9089 0.120 Uiso 1 1 calc R . . 
C18 C 0.1190(5) 0.0804(4) 0.8705(4) 0.125(3) Uani 1 1 d . A . 
C19 C 0.1877(2) 0.1700(3) 0.8287(3) 0.0794(14) Uani 1 1 d . . . 
C20 C 0.23859(19) 0.2242(3) 0.8629(2) 0.0697(13) Uani 1 1 d . A . 
H20A H 0.2655 0.1942 0.9019 0.084 Uiso 1 1 calc R . . 
H20B H 0.2635 0.2405 0.8280 0.084 Uiso 1 1 calc R . . 
C21 C 0.25965(18) 0.3505(4) 0.9288(3) 0.0772(14) Uani 1 1 d . . . 
H21A H 0.2912 0.3621 0.9006 0.093 Uiso 1 1 calc R A . 
H21B H 0.2801 0.3236 0.9734 0.093 Uiso 1 1 calc R . . 
C22 C 0.2312(2) 0.4285(3) 0.9449(3) 0.0784(14) Uani 1 1 d . A . 
H22A H 0.2630 0.4657 0.9715 0.094 Uiso 1 1 calc R . . 
H22B H 0.2117 0.4564 0.9003 0.094 Uiso 1 1 calc R . . 
C23 C 0.1589(3) 0.4842(3) 1.0094(3) 0.103(2) Uani 1 1 d . . . 
H23A H 0.1357 0.5147 0.9681 0.123 Uiso 1 1 calc R A . 
H23B H 0.1915 0.5210 1.0351 0.123 Uiso 1 1 calc R . . 
C24 C 0.1166(4) 0.4606(4) 1.0571(3) 0.115(2) Uani 1 1 d . A . 
H24A H 0.1395 0.4288 1.0978 0.138 Uiso 1 1 calc R . . 
H24B H 0.1001 0.5109 1.0755 0.138 Uiso 1 1 calc R . . 
O9 O 0.0789(2) -0.1404(3) 0.8501(3) 0.1129(13) Uani 1 1 d . . . 
C25 C 0.1314(6) -0.1759(5) 0.8937(4) 0.160(4) Uani 1 1 d . . . 
H25A H 0.1243 -0.2346 0.9035 0.191 Uiso 1 1 calc R . . 
H25B H 0.1428 -0.1459 0.9392 0.191 Uiso 1 1 calc R . . 
C26 C 0.1819(4) -0.1665(6) 0.8491(6) 0.157(4) Uani 1 1 d . . . 
H26A H 0.2098 -0.1201 0.8668 0.189 Uiso 1 1 calc R . . 
H26B H 0.2064 -0.2177 0.8509 0.189 Uiso 1 1 calc R . . 
C27 C 0.1495(4) -0.1508(5) 0.7790(5) 0.131(3) Uani 1 1 d . . . 
H27A H 0.1630 -0.0979 0.7615 0.157 Uiso 1 1 calc R . . 
H27B H 0.1566 -0.1956 0.7468 0.157 Uiso 1 1 calc R . . 
C28 C 0.0870(3) -0.1470(4) 0.7828(4) 0.1086(19) Uani 1 1 d . . . 
H28B H 0.0679 -0.0989 0.7552 0.130 Uiso 1 1 calc R . . 
H28A H 0.0660 -0.1973 0.7611 0.130 Uiso 1 1 calc R . . 
 
loop_ 
 _atom_site_aniso_label 
 _atom_site_aniso_U_11 
 _atom_site_aniso_U_22 
 _atom_site_aniso_U_33 
 _atom_site_aniso_U_23 
 _atom_site_aniso_U_13 
 _atom_site_aniso_U_12 
Co1 0.0339(3) 0.0383(4) 0.0439(4) 0.000 0.0039(2) 0.000 
K1 0.0420(4) 0.0469(4) 0.0427(4) -0.0046(3) 0.0124(3) -0.0035(3) 
F2 0.0649(14) 0.0960(19) 0.0909(19) 0.0118(15) 0.0432(13) 0.0025(14) 
F3 0.129(3) 0.0623(18) 0.170(3) 0.0264(19) 0.064(2) -0.0083(18) 
F4 0.135(3) 0.0529(16) 0.150(3) -0.0101(17) 0.052(2) 0.0302(17) 
F5 0.0725(15) 0.0937(19) 0.0895(19) -0.0083(15) 0.0444(14) 0.0245(14) 
F6 0.0591(13) 0.0636(14) 0.0730(15) 0.0133(12) 0.0228(11) 0.0035(11) 
F8 0.098(2) 0.099(2) 0.0808(19) 0.0032(16) 0.0153(16) 0.0091(18) 
F9 0.104(2) 0.089(2) 0.117(2) -0.0142(18) 0.0044(18) 0.0550(18) 
F10 0.0771(19) 0.159(3) 0.123(3) -0.047(2) 0.0417(18) 0.014(2) 
F11 0.133(3) 0.116(3) 0.123(3) -0.006(2) 0.027(2) -0.031(2) 
F12 0.121(2) 0.0611(17) 0.129(3) -0.0144(17) -0.021(2) 0.0279(17) 
O1 0.0377(12) 0.0537(15) 0.0596(15) -0.0119(12) 0.0008(10) 0.0132(11) 
O2 0.0448(14) 0.108(3) 0.079(2) -0.0503(18) -0.0065(13) 0.0221(15) 
O3 0.145(4) 0.113(3) 0.120(3) -0.059(3) 0.045(3) 0.013(3) 
O4 0.100(3) 0.139(4) 0.076(2) -0.012(3) 0.046(2) -0.012(3) 
O5 0.136(3) 0.073(2) 0.069(2) 0.0183(18) 0.014(2) -0.027(2) 
O6 0.060(2) 0.065(3) 0.051(3) -0.006(2) 0.0017(19) 0.006(2) 
O7 0.0349(12) 0.0803(19) 0.0583(15) 0.0022(14) 0.0104(11) 0.0030(12) 
O8 0.089(2) 0.0507(16) 0.0687(18) -0.0037(14) 0.0047(16) -0.0128(15) 
C1 0.0416(17) 0.050(2) 0.0348(16) -0.0046(14) 0.0029(13) 0.0074(15) 
C2 0.0488(19) 0.059(2) 0.054(2) -0.0009(18) 0.0196(16) 0.0020(17) 
C3 0.085(3) 0.051(2) 0.079(3) 0.009(2) 0.027(2) -0.005(2) 
C4 0.079(3) 0.045(2) 0.080(3) -0.007(2) 0.023(2) 0.018(2) 
C5 0.053(2) 0.066(3) 0.049(2) -0.0060(18) 0.0186(17) 0.0147(19) 
C6 0.0478(18) 0.049(2) 0.0398(18) -0.0006(15) 0.0116(14) 0.0033(16) 
C7 0.047(2) 0.073(3) 0.054(2) -0.032(2) -0.0120(17) 0.018(2) 
C8 0.062(2) 0.070(3) 0.049(2) -0.012(2) -0.0007(18) 0.009(2) 
C9 0.065(3) 0.071(3) 0.061(3) -0.021(2) -0.002(2) 0.033(2) 
C10 0.061(3) 0.094(4) 0.067(3) -0.030(3) 0.009(2) 0.012(3) 
C11 0.082(3) 0.079(3) 0.068(3) -0.019(3) 0.005(2) -0.009(3) 
C12 0.071(3) 0.060(3) 0.072(3) -0.023(2) -0.013(2) 0.017(2) 
C13 0.182(8) 0.187(9) 0.163(8) -0.067(7) 0.123(7) 0.022(7) 
C14 0.156(7) 0.197(9) 0.091(5) 0.007(6) 0.071(5) 0.049(7) 
C15 0.104(5) 0.186(8) 0.087(4) 0.065(5) 0.042(4) 0.004(5) 
C16 0.080(3) 0.115(5) 0.097(4) 0.038(4) -0.002(3) -0.038(3) 
C17 0.076(3) 0.050(3) 0.154(6) -0.022(3) -0.026(3) -0.011(2) 
C18 0.233(9) 0.057(3) 0.087(4) -0.012(3) 0.038(5) -0.024(4) 
C19 0.074(3) 0.083(3) 0.083(3) -0.028(3) 0.020(2) 0.022(3) 
C20 0.055(2) 0.094(3) 0.068(3) 0.022(2) 0.030(2) 0.030(2) 
C21 0.039(2) 0.119(4) 0.071(3) 0.015(3) 0.0066(18) -0.021(2) 
C22 0.076(3) 0.075(3) 0.074(3) 0.011(2) -0.009(2) -0.036(3) 
C23 0.165(6) 0.041(3) 0.087(4) -0.017(2) -0.009(4) 0.000(3) 
C24 0.169(7) 0.092(4) 0.084(4) -0.038(4) 0.020(4) 0.029(4) 
O9 0.124(3) 0.131(4) 0.097(3) 0.003(3) 0.052(3) 0.004(3) 
C25 0.268(12) 0.106(5) 0.086(5) 0.016(4) -0.007(7) -0.023(7) 
C26 0.095(5) 0.174(9) 0.187(10) 0.046(8) -0.007(6) 0.010(5) 
C27 0.134(6) 0.108(5) 0.172(8) -0.011(5) 0.082(6) 0.000(5) 
C28 0.116(5) 0.113(5) 0.098(5) -0.007(4) 0.026(4) -0.015(4) 
 
_geom_special_details 
; 
 All esds (except the esd in the dihedral angle between two l.s. planes) 
 are estimated using the full covariance matrix.  The cell esds are taken 
 into account individually in the estimation of esds in distances, angles 
 and torsion angles; correlations between esds in cell parameters are only 
 used when they are defined by crystal symmetry.  An approximate (isotropic) 
 treatment of cell esds is used for estimating esds involving l.s. planes. 
; 
 
loop_ 
 _geom_bond_atom_site_label_1 
 _geom_bond_atom_site_label_2 
 _geom_bond_distance 
 _geom_bond_site_symmetry_2 
 _geom_bond_publ_flag 
Co1 O2 1.932(3) . ? 
Co1 O2 1.932(3) 2_556 ? 
Co1 O1 1.938(2) 2_556 ? 
Co1 O1 1.938(2) . ? 
Co1 K1 3.6673(7) . ? 
Co1 K1 3.6673(7) 2_556 ? 
K1 O1 2.785(3) 2_556 ? 
K1 O5 2.808(3) . ? 
K1 O2 2.811(3) 2_556 ? 
K1 O6' 2.842(10) . ? 
K1 O7 2.844(2) . ? 
K1 O3 2.861(4) . ? 
K1 O4 2.868(4) . ? 
K1 O8 2.897(3) . ? 
K1 O6 2.965(4) . ? 
K1 C1 3.508(3) 2_556 ? 
F2 C2 1.344(4) . ? 
F3 C3 1.339(5) . ? 
F4 C4 1.348(4) . ? 
F5 C5 1.346(4) . ? 
F6 C6 1.345(4) . ? 
F8 C8 1.346(5) . ? 
F9 C9 1.354(5) . ? 
F10 C10 1.353(5) . ? 
F11 C11 1.343(6) . ? 
F12 C12 1.341(5) . ? 
O1 C1 1.310(4) . ? 
O1 K1 2.785(3) 2_556 ? 
O2 C7 1.307(5) . ? 
O2 K1 2.811(3) 2_556 ? 
O3 C24 1.372(8) . ? 
O3 C13 1.479(9) . ? 
O4 C14 1.371(9) . ? 
O4 C15 1.391(8) . ? 
O5 C16 1.356(7) . ? 
O5 C17 1.423(7) . ? 
O6 C18 1.305(8) . ? 
O6 C19 1.541(7) . ? 
O6' C19 1.171(11) . ? 
O6' C18 1.428(12) . ? 
O7 C21 1.416(5) . ? 
O7 C20 1.419(5) . ? 
O8 C22 1.402(6) . ? 
O8 C23 1.431(6) . ? 
C1 C2 1.388(5) . ? 
C1 C6 1.397(5) . ? 
C1 K1 3.508(3) 2_556 ? 
C2 C3 1.385(6) . ? 
C3 C4 1.361(6) . ? 
C4 C5 1.367(6) . ? 
C5 C6 1.371(5) . ? 
C7 C12 1.390(7) . ? 
C7 C8 1.391(6) . ? 
C8 C9 1.377(6) . ? 
C9 C10 1.355(7) . ? 
C10 C11 1.362(7) . ? 
C11 C12 1.364(7) . ? 
C13 C14 1.395(11) . ? 
C15 C16 1.411(10) . ? 
C17 C18 1.395(9) . ? 
C19 C20 1.463(7) . ? 
C21 C22 1.461(7) . ? 
C23 C24 1.478(9) . ? 
O9 C28 1.338(7) . ? 
O9 C25 1.401(10) . ? 
C25 C26 1.540(12) . ? 
C26 C27 1.405(11) . ? 
C27 C28 1.393(9) . ? 
 
loop_ 
 _geom_angle_atom_site_label_1 
 _geom_angle_atom_site_label_2 
 _geom_angle_atom_site_label_3 
 _geom_angle 
 _geom_angle_site_symmetry_1 
 _geom_angle_site_symmetry_3 
 _geom_angle_publ_flag 
O2 Co1 O2 121.0(2) . 2_556 ? 
O2 Co1 O1 107.98(12) . 2_556 ? 
O2 Co1 O1 97.03(11) 2_556 2_556 ? 
O2 Co1 O1 97.03(11) . . ? 
O2 Co1 O1 107.98(12) 2_556 . ? 
O1 Co1 O1 128.04(15) 2_556 . ? 
O2 Co1 K1 133.33(8) . . ? 
O2 Co1 K1 49.08(8) 2_556 . ? 
O1 Co1 K1 48.34(7) 2_556 . ? 
O1 Co1 K1 129.56(7) . . ? 
O2 Co1 K1 49.08(8) . 2_556 ? 
O2 Co1 K1 133.33(8) 2_556 2_556 ? 
O1 Co1 K1 129.56(7) 2_556 2_556 ? 
O1 Co1 K1 48.34(7) . 2_556 ? 
K1 Co1 K1 176.36(3) . 2_556 ? 
O1 K1 O5 123.03(9) 2_556 . ? 
O1 K1 O2 62.40(7) 2_556 2_556 ? 
O5 K1 O2 73.74(10) . 2_556 ? 
O1 K1 O6' 69.2(3) 2_556 . ? 
O5 K1 O6' 64.4(3) . . ? 
O2 K1 O6' 73.0(3) 2_556 . ? 
O1 K1 O7 70.68(7) 2_556 . ? 
O5 K1 O7 107.79(11) . . ? 
O2 K1 O7 121.15(9) 2_556 . ? 
O6' K1 O7 58.0(2) . . ? 
O1 K1 O3 113.43(12) 2_556 . ? 
O5 K1 O3 116.97(14) . . ? 
O2 K1 O3 114.45(13) 2_556 . ? 
O6' K1 O3 172.5(3) . . ? 
O7 K1 O3 115.58(12) . . ? 
O1 K1 O4 146.74(10) 2_556 . ? 
O5 K1 O4 57.64(13) . . ? 
O2 K1 O4 89.62(10) 2_556 . ? 
O6' K1 O4 122.0(3) . . ? 
O7 K1 O4 142.58(10) . . ? 
O3 K1 O4 60.00(14) . . ? 
O1 K1 O8 97.02(8) 2_556 . ? 
O5 K1 O8 131.29(10) . . ? 
O2 K1 O8 154.97(9) 2_556 . ? 
O6' K1 O8 114.8(2) . . ? 
O7 K1 O8 57.33(9) . . ? 
O3 K1 O8 58.43(13) . . ? 
O4 K1 O8 103.96(11) . . ? 
O1 K1 O6 87.14(11) 2_556 . ? 
O5 K1 O6 53.22(12) . . ? 
O2 K1 O6 84.98(11) 2_556 . ? 
O6' K1 O6 18.5(2) . . ? 
O7 K1 O6 58.46(10) . . ? 
O3 K1 O6 156.26(14) . . ? 
O4 K1 O6 109.23(14) . . ? 
O8 K1 O6 109.39(10) . . ? 
O1 K1 C1 20.12(7) 2_556 2_556 ? 
O5 K1 C1 142.08(10) . 2_556 ? 
O2 K1 C1 80.43(8) 2_556 2_556 ? 
O6' K1 C1 81.9(3) . 2_556 ? 
O7 K1 C1 63.33(8) . 2_556 ? 
O3 K1 C1 98.75(12) . 2_556 ? 
O4 K1 C1 150.23(12) . 2_556 ? 
O8 K1 C1 77.42(8) . 2_556 ? 
O6 K1 C1 97.85(11) . 2_556 ? 
O1 K1 Co1 31.32(5) 2_556 . ? 
O5 K1 Co1 100.48(7) . . ? 
O2 K1 Co1 31.29(5) 2_556 . ? 
O6' K1 Co1 70.4(3) . . ? 
O7 K1 Co1 97.78(6) . . ? 
O3 K1 Co1 115.64(11) . . ? 
O4 K1 Co1 117.98(9) . . ? 
O8 K1 Co1 126.06(6) . . ? 
O6 K1 Co1 88.07(9) . . ? 
C1 K1 Co1 49.25(5) 2_556 . ? 
C1 O1 Co1 133.5(2) . . ? 
C1 O1 K1 112.87(19) . 2_556 ? 
Co1 O1 K1 100.34(9) . 2_556 ? 
C7 O2 Co1 125.8(2) . . ? 
C7 O2 K1 122.9(3) . 2_556 ? 
Co1 O2 K1 99.63(10) . 2_556 ? 
C24 O3 C13 114.2(6) . . ? 
C24 O3 K1 117.9(4) . . ? 
C13 O3 K1 111.2(4) . . ? 
C14 O4 C15 117.2(6) . . ? 
C14 O4 K1 117.0(5) . . ? 
C15 O4 K1 115.3(3) . . ? 
C16 O5 C17 116.8(5) . . ? 
C16 O5 K1 120.9(4) . . ? 
C17 O5 K1 117.3(3) . . ? 
C18 O6 C19 110.6(5) . . ? 
C18 O6 K1 103.9(4) . . ? 
C19 O6 K1 99.2(3) . . ? 
C19 O6' C18 128.5(10) . . ? 
C19 O6' K1 118.6(7) . . ? 
C18 O6' K1 106.0(6) . . ? 
C21 O7 C20 114.3(3) . . ? 
C21 O7 K1 119.2(2) . . ? 
C20 O7 K1 118.0(2) . . ? 
C22 O8 C23 114.1(4) . . ? 
C22 O8 K1 115.9(2) . . ? 
C23 O8 K1 113.3(3) . . ? 
O1 C1 C2 122.5(3) . . ? 
O1 C1 C6 122.6(3) . . ? 
C2 C1 C6 114.8(3) . . ? 
O1 C1 K1 47.01(15) . 2_556 ? 
C2 C1 K1 96.9(2) . 2_556 ? 
C6 C1 K1 125.7(2) . 2_556 ? 
F2 C2 C3 119.0(4) . . ? 
F2 C2 C1 118.3(3) . . ? 
C3 C2 C1 122.8(3) . . ? 
F3 C3 C4 120.4(4) . . ? 
F3 C3 C2 119.4(4) . . ? 
C4 C3 C2 120.2(4) . . ? 
F4 C4 C3 120.9(4) . . ? 
F4 C4 C5 120.1(4) . . ? 
C3 C4 C5 119.0(4) . . ? 
F5 C5 C4 119.8(4) . . ? 
F5 C5 C6 119.5(4) . . ? 
C4 C5 C6 120.7(3) . . ? 
F6 C6 C5 118.3(3) . . ? 
F6 C6 C1 119.2(3) . . ? 
C5 C6 C1 122.5(3) . . ? 
O2 C7 C12 122.1(4) . . ? 
O2 C7 C8 123.9(5) . . ? 
C12 C7 C8 114.1(4) . . ? 
F8 C8 C9 119.1(4) . . ? 
F8 C8 C7 118.4(4) . . ? 
C9 C8 C7 122.5(5) . . ? 
C10 C9 F9 120.1(4) . . ? 
C10 C9 C8 121.0(4) . . ? 
F9 C9 C8 118.9(5) . . ? 
F10 C10 C9 120.4(5) . . ? 
F10 C10 C11 121.2(6) . . ? 
C9 C10 C11 118.4(4) . . ? 
F11 C11 C10 119.1(5) . . ? 
F11 C11 C12 120.3(5) . . ? 
C10 C11 C12 120.6(5) . . ? 
F12 C12 C11 119.0(5) . . ? 
F12 C12 C7 117.6(5) . . ? 
C11 C12 C7 123.4(4) . . ? 
C14 C13 O3 116.0(7) . . ? 
O4 C14 C13 113.0(6) . . ? 
O4 C15 C16 114.9(5) . . ? 
O5 C16 C15 112.4(5) . . ? 
C18 C17 O5 114.0(5) . . ? 
O6 C18 C17 110.2(5) . . ? 
O6 C18 O6' 40.0(5) . . ? 
C17 C18 O6' 135.5(7) . . ? 
O6' C19 C20 125.9(7) . . ? 
O6' C19 O6 37.7(7) . . ? 
C20 C19 O6 103.2(4) . . ? 
O7 C20 C19 109.6(3) . . ? 
O7 C21 C22 110.3(3) . . ? 
O8 C22 C21 109.3(4) . . ? 
O8 C23 C24 110.3(4) . . ? 
O3 C24 C23 110.4(5) . . ? 
C28 O9 C25 106.6(6) . . ? 
O9 C25 C26 103.4(6) . . ? 
C27 C26 C25 105.1(6) . . ? 
C28 C27 C26 106.0(7) . . ? 
O9 C28 C27 112.2(6) . . ? 
 
_diffrn_measured_fraction_theta_max    0.999 
_diffrn_reflns_theta_full              26.00 
_diffrn_measured_fraction_theta_full   0.999 
_refine_diff_density_max    0.652 
_refine_diff_density_min   -0.305 
_refine_diff_density_rms    0.060
#===END 
data_compound6 
  
_audit_creation_method            SHELXL-97 
# 1. SUBMISSION DETAILS                                                         
_publ_contact_author_name                       'Linda H. Doerrer'              
_publ_contact_author_address                                                    
;                                                                               
Barnard College, Chemistry Department                                           
3009 Broadway                                                                   
New York, NY, 10027                                                             
;                                                                               
_publ_contact_author_phone                      ' 212-854-2074 '                
_publ_contact_author_fax                        ' 212-854-2310 '                
_publ_contact_author_email        ' ldoerrer@barnard.edu '                      
_publ_requested_journal                         'Inorganic Chemistry'           
_publ_requested_coeditor_name                   ' Prof James Mayer '            
#============================================================================== 
# 3. TITLE AND AUTHOR LIST                                                      
_publ_section_title                                                             
;                                                                               
Homoleptic Cobalt and Copper Phenolate A2[M(OAr)4] Compounds
The Effect of Phenoxide Fluorination
;                                                                               
# The loop structure below should contain the names and addresses of all        
# authors, in the required order of publication. Repeat as necessary.           
loop_                                                                           
        _publ_author_name                                                       
        _publ_author_address                                                    
        _publ_author_footnote                                                   
'Buzzeo, Marisa C.'                               #<--'Last name, first name'   
;                                                                               
Barnard College, Chemistry Department                                           
3009 Broadway                                                                   
New York, NY, 10027                                                             
;                                                                               
'Iqbal, Amber H.'                                                               
;                                                                               
Barnard College, Chemistry Department                                           
3009 Broadway                                                                   
New York, NY, 10027                                                             
;                                                                               
'Long, Charli M.'                                                               
;                                                                               
Barnard College, Chemistry Department                                           
3009 Broadway                                                                   
New York, NY, 10027                                                             
;                                                                               
'Millar, David'                                                                 
;                                                                               
Barnard College, Chemistry Department                                           
3009 Broadway                                                                   
New York, NY, 10027                                                             
;                                                                               
'Patel, Sonal'                                                                  
;                                                                               
Barnard College, Chemistry Department                                           
3009 Broadway                                                                   
New York, NY, 10027                                                             
;                                                                               
'Pellow, Matthew A.'                                                            
;                                                                               
Barnard College, Chemistry Department                                           
3009 Broadway                                                                   
New York, NY, 10027                                                             
;                                                                               
'Saddoughi, Sahar A.'                                                           
;                                                                               
Barnard College, Chemistry Department                                           
3009 Broadway                                                                   
New York, NY, 10027                                                             
;                                                                               
'Smenton, Abigail L.'                                                           
;                                                                               
Barnard College, Chemistry Department                                           
3009 Broadway                                                                   
New York, NY, 10027                                                             
;                                                                               
'Turner, John F. C.'                                                            
;                                                                               
Department of Chemistry                                                         
408 Buehler Hall                                                                
University of Tennessee                                                         
Knoxville, TN 37996                                                             
;                                                                               
'Wadhawan, Jay D.'                                                              
;                                                                               
Physical and Theoretical Chemistry Laboratory                                   
University of Oxford                                                            
OXFORD OX1 3QZ, UK                                                              
;                                                                               
'Compton, Richard G.'
;                                                                          
Physical and Theoretical Chemistry Laboratory                                   
University of Oxford                                                            
OXFORD OX1 3QZ, UK                                                              
;                                                                               
'Golen, James A.'                                                               
;                                                                               
Department of Chemistry and Biochemistry                                        
MC 0358                                                                         
University of California, San Diego                                             
9500 Gilman Drive                                                               
La Jolla, CA 92093                                                              
;
;                                                                               
permanent address is the Department of Chemistry & Biochemistry, University of  
Massachusetts Dartmouth, North Dartmouth MA 02747                               
;                                                                               
'Rheingold, Arnold L.'                                                          
;                                                                               
Department of Chemistry and Biochemistry                                        
MC 0358                                                                         
University of California, San Diego                                             
9500 Gilman Drive                                                               
La Jolla, CA 92093                                                              
;                                                                               
#============================================================================== 
_chemical_name_systematic 
; 
 Squeeze used to fit solvent CH2Cl2, calculated from program 155 e/unit cell, 
from formula for 4 CH2cL2 168 e/unit cell. 
; 
_chemical_name_common             ? 
_chemical_melting_point           ? 
_chemical_formula_moiety          'C60 H78 Cu2 K2 O18, CH2Cl2' 
_chemical_formula_sum 
 'C61 H80 Cl2 Cu2 K2 O18' 
_chemical_formula_weight          1377.43 
  
loop_ 
 _atom_type_symbol 
 _atom_type_description 
 _atom_type_scat_dispersion_real 
 _atom_type_scat_dispersion_imag 
 _atom_type_scat_source 
 'C'  'C'   0.0033   0.0016 
 'International Tables Vol C Tables 4.2.6.8 and 6.1.1.4' 
 'H'  'H'   0.0000   0.0000 
 'International Tables Vol C Tables 4.2.6.8 and 6.1.1.4' 
 'O'  'O'   0.0106   0.0060 
 'International Tables Vol C Tables 4.2.6.8 and 6.1.1.4' 
 'K'  'K'   0.2009   0.2494 
 'International Tables Vol C Tables 4.2.6.8 and 6.1.1.4' 
 'Cu'  'Cu'   0.3201   1.2651 
 'International Tables Vol C Tables 4.2.6.8 and 6.1.1.4' 
 'Cl'  'Cl'   0.1484   0.1585 
 'International Tables Vol C Tables 4.2.6.8 and 6.1.1.4' 
  
_symmetry_cell_setting            Monoclinic 
_symmetry_space_group_name_H-M    P2(1)/n 
  
loop_ 
 _symmetry_equiv_pos_as_xyz 
 'x, y, z' 
 '-x+1/2, y+1/2, -z+1/2' 
 '-x, -y, -z' 
 'x-1/2, -y-1/2, z-1/2' 
  
_cell_length_a                    15.205(5) 
_cell_length_b                    21.230(8) 
_cell_length_c                    20.040(7) 
_cell_angle_alpha                 90.00 
_cell_angle_beta                  91.224(7) 
_cell_angle_gamma                 90.00 
_cell_volume                      6468(4) 
_cell_formula_units_Z             4 
_cell_measurement_temperature     218(2) 
_cell_measurement_reflns_used     7625 
_cell_measurement_theta_min       2.41 
_cell_measurement_theta_max       28.29 
  
_exptl_crystal_description        BLOCKS 
_exptl_crystal_colour             BLACK 
_exptl_crystal_size_max           0.40 
_exptl_crystal_size_mid           0.30 
_exptl_crystal_size_min           0.28 
_exptl_crystal_density_meas       '?' 
_exptl_crystal_density_diffrn     1.415 
_exptl_crystal_density_method     'not measured' 
_exptl_crystal_F_000              2880 
_exptl_absorpt_coefficient_mu     0.937 
_exptl_absorpt_correction_type    'Multi-scan'
_exptl_absorpt_correction_T_min   0.786 
_exptl_absorpt_correction_T_max   1.000 
_exptl_absorpt_process_details    SADABS 
  
_exptl_special_details 
; 
 ? 
; 
  
_diffrn_ambient_temperature       218(2) 
_diffrn_radiation_wavelength      0.71073 
_diffrn_radiation_type            MoK\a 
_diffrn_radiation_source          'fine-focus sealed tube' 
_diffrn_radiation_monochromator   graphite 
_diffrn_measurement_device_type   'CCD area detector' 
_diffrn_measurement_method        'phi and omega scans' 
_diffrn_detector_area_resol_mean  ? 
_diffrn_standards_number          ? 
_diffrn_standards_interval_count  ? 
_diffrn_standards_interval_time   ? 
_diffrn_standards_decay_%         ? 
_diffrn_reflns_number             38465 
_diffrn_reflns_av_R_equivalents   0.0368 
_diffrn_reflns_av_sigmaI/netI     0.0419 
_diffrn_reflns_limit_h_min        -18 
_diffrn_reflns_limit_h_max        18 
_diffrn_reflns_limit_k_min        -25 
_diffrn_reflns_limit_k_max        25 
_diffrn_reflns_limit_l_min        -23 
_diffrn_reflns_limit_l_max        21 
_diffrn_reflns_theta_min          1.40 
_diffrn_reflns_theta_max          25.00 
_reflns_number_total              11384 
_reflns_number_gt                 8277 
_reflns_threshold_expression      >2sigma(I) 
  
_computing_data_collection        'Bruker SMART' 
_computing_cell_refinement        'Bruker SMART' 
_computing_data_reduction         'Bruker SAINT' 
_computing_structure_solution     'SHELXS-97 (Sheldrick, 1990)' 
_computing_structure_refinement   'SHELXL-97 (Sheldrick, 1997)' 
_computing_molecular_graphics     'Bruker SHELXTL' 
_computing_publication_material   'Bruker SHELXTL' 
  
_refine_special_details 
; 
 Refinement of F^2^ against ALL reflections.  The weighted R-factor wR and 
 goodness of fit S are based on F^2^, conventional R-factors R are based 
 on F, with F set to zero for negative F^2^. The threshold expression of 
 F^2^ > 2sigma(F^2^) is used only for calculating R-factors(gt) etc. and is 
 not relevant to the choice of reflections for refinement.  R-factors based 
 on F^2^ are statistically about twice as large as those based on F, and R- 
 factors based on ALL data will be even larger. 
; 
  
_refine_ls_structure_factor_coef  Fsqd 
_refine_ls_matrix_type            full 
_refine_ls_weighting_scheme       calc 
_refine_ls_weighting_details 
 'calc w=1/[\s^2^(Fo^2^)+(0.0831P)^2^+0.0000P] where P=(Fo^2^+2Fc^2^)/3' 
_atom_sites_solution_primary      direct 
_atom_sites_solution_secondary    difmap 
_atom_sites_solution_hydrogens    geom 
_refine_ls_hydrogen_treatment     mixed 
_refine_ls_extinction_method      none 
_refine_ls_extinction_coef        ? 
_refine_ls_number_reflns          11384 
_refine_ls_number_parameters      739 
_refine_ls_number_restraints      0 
_refine_ls_R_factor_all           0.0682 
_refine_ls_R_factor_gt            0.0498 
_refine_ls_wR_factor_ref          0.1383 
_refine_ls_wR_factor_gt           0.1295 
_refine_ls_goodness_of_fit_ref    1.028 
_refine_ls_restrained_S_all       1.028 
_refine_ls_shift/su_max           0.001 
_refine_ls_shift/su_mean          0.000 
  
loop_ 
 _atom_site_label 
 _atom_site_type_symbol 
 _atom_site_fract_x 
 _atom_site_fract_y 
 _atom_site_fract_z 
 _atom_site_U_iso_or_equiv 
 _atom_site_adp_type 
 _atom_site_occupancy 
 _atom_site_symmetry_multiplicity 
 _atom_site_calc_flag 
 _atom_site_refinement_flags 
 _atom_site_disorder_assembly 
 _atom_site_disorder_group 
Cu1 Cu 0.16019(2) 0.232654(16) 0.461310(17) 0.03113(12) Uani 1 1 d . . . 
Cu2 Cu 0.32893(2) 0.261731(16) 0.540234(17) 0.03153(12) Uani 1 1 d . . . 
K1 K -0.07130(4) 0.21543(3) 0.41765(3) 0.03645(17) Uani 1 1 d . . . 
K2 K 0.56064(4) 0.28743(3) 0.58440(3) 0.03853(17) Uani 1 1 d . . . 
O1 O 0.26174(11) 0.28852(10) 0.46079(10) 0.0362(5) Uani 1 1 d . . . 
O2 O 0.22748(11) 0.20470(9) 0.53993(10) 0.0359(5) Uani 1 1 d . . . 
O3 O 0.08877(11) 0.16042(9) 0.44459(10) 0.0367(5) Uani 1 1 d . . . 
O4 O 0.08116(13) 0.28124(10) 0.40924(11) 0.0440(5) Uani 1 1 d . . . 
O5 O 0.40792(12) 0.21543(10) 0.59477(11) 0.0422(5) Uani 1 1 d . . . 
O6 O 0.39815(12) 0.33505(9) 0.55512(11) 0.0410(5) Uani 1 1 d . . . 
O7 O -0.16631(15) 0.32792(11) 0.44866(12) 0.0584(6) Uani 1 1 d . . . 
O8 O -0.14740(14) 0.29693(11) 0.31635(12) 0.0565(6) Uani 1 1 d . . . 
O9 O -0.12381(14) 0.16745(11) 0.28852(11) 0.0524(6) Uani 1 1 d . . . 
O10 O -0.15198(14) 0.09500(10) 0.40009(11) 0.0484(6) Uani 1 1 d . . . 
O11 O -0.11872(13) 0.12055(11) 0.52928(11) 0.0479(6) Uani 1 1 d . . . 
O12 O -0.10196(15) 0.25047(11) 0.55150(12) 0.0528(6) Uani 1 1 d . . . 
O13 O 0.63353(17) 0.41340(12) 0.55732(14) 0.0685(7) Uani 1 1 d . . . 
O14 O 0.60334(17) 0.34188(15) 0.45120(14) 0.0767(8) Uani 1 1 d . . . 
O15 O 0.60705(15) 0.20954(13) 0.47499(12) 0.0625(7) Uani 1 1 d . . . 
O16 O 0.66406(13) 0.17846(10) 0.60161(12) 0.0511(6) Uani 1 1 d . . . 
O17 O 0.60886(14) 0.24793(11) 0.71401(11) 0.0520(6) Uani 1 1 d . . . 
O18 O 0.65091(16) 0.37542(13) 0.68420(13) 0.0693(7) Uani 1 1 d . . . 
C1 C 0.30112(17) 0.30583(15) 0.40341(15) 0.0376(7) Uani 1 1 d . . . 
C2 C 0.3067(2) 0.36777(17) 0.38573(17) 0.0556(9) Uani 1 1 d . . . 
H2A H 0.2830 0.3990 0.4134 0.067 Uiso 1 1 calc R . . 
C3 C 0.3472(3) 0.38475(19) 0.32701(19) 0.0645(11) Uani 1 1 d . . . 
H3A H 0.3502 0.4274 0.3148 0.077 Uiso 1 1 calc R . . 
C4 C 0.3824(2) 0.3406(2) 0.28734(18) 0.0587(10) Uani 1 1 d . . . 
H4A H 0.4112 0.3527 0.2483 0.070 Uiso 1 1 calc R . . 
C5 C 0.3763(2) 0.2786(2) 0.30346(18) 0.0599(10) Uani 1 1 d . . . 
H5A H 0.3998 0.2477 0.2753 0.072 Uiso 1 1 calc R . . 
C6 C 0.3355(2) 0.26148(16) 0.36128(17) 0.0481(8) Uani 1 1 d . . . 
H6A H 0.3311 0.2186 0.3722 0.058 Uiso 1 1 calc R . . 
C7 C 0.18915(16) 0.18521(14) 0.59676(14) 0.0340(7) Uani 1 1 d . . . 
C8 C 0.1418(2) 0.22614(16) 0.63529(17) 0.0455(8) Uani 1 1 d . . . 
H8A H 0.1361 0.2685 0.6221 0.055 Uiso 1 1 calc R . . 
C9 C 0.1028(2) 0.20606(19) 0.69268(17) 0.0539(9) Uani 1 1 d . . . 
H9A H 0.0703 0.2346 0.7183 0.065 Uiso 1 1 calc R . . 
C10 C 0.1111(2) 0.14449(19) 0.71277(17) 0.0529(9) Uani 1 1 d . . . 
H10A H 0.0848 0.1307 0.7522 0.063 Uiso 1 1 calc R . . 
C11 C 0.1577(2) 0.10384(17) 0.67501(17) 0.0538(9) Uani 1 1 d . . . 
H11A H 0.1631 0.0616 0.6886 0.065 Uiso 1 1 calc R . . 
C12 C 0.1972(2) 0.12318(15) 0.61717(15) 0.0425(7) Uani 1 1 d . . . 
H12A H 0.2294 0.0944 0.5918 0.051 Uiso 1 1 calc R . . 
C13 C 0.12090(17) 0.11089(13) 0.41297(14) 0.0336(6) Uani 1 1 d . . . 
C14 C 0.06666(19) 0.07848(14) 0.36696(15) 0.0383(7) Uani 1 1 d . . . 
H14A H 0.0086 0.0924 0.3592 0.046 Uiso 1 1 calc R . . 
C15 C 0.0969(2) 0.02685(16) 0.33302(16) 0.0485(8) Uani 1 1 d . . . 
H15A H 0.0592 0.0058 0.3026 0.058 Uiso 1 1 calc R . . 
C16 C 0.1814(2) 0.00575(16) 0.34310(17) 0.0528(9) Uani 1 1 d . . . 
H16A H 0.2024 -0.0292 0.3195 0.063 Uiso 1 1 calc R . . 
C17 C 0.2346(2) 0.03689(16) 0.38852(17) 0.0512(9) Uani 1 1 d . . . 
H17A H 0.2924 0.0225 0.3962 0.061 Uiso 1 1 calc R . . 
C18 C 0.20557(19) 0.08844(15) 0.42290(16) 0.0427(8) Uani 1 1 d . . . 
H18A H 0.2437 0.1088 0.4535 0.051 Uiso 1 1 calc R . . 
C19 C 0.08121(18) 0.34343(15) 0.40613(16) 0.0414(7) Uani 1 1 d . . . 
C20 C 0.0907(2) 0.38107(18) 0.46148(19) 0.0569(10) Uani 1 1 d . . . 
H20A H 0.0983 0.3627 0.5039 0.068 Uiso 1 1 calc R . . 
C21 C 0.0893(3) 0.4467(2) 0.4551(3) 0.0833(14) Uani 1 1 d . . . 
H21A H 0.0958 0.4724 0.4931 0.100 Uiso 1 1 calc R . . 
C22 C 0.0784(3) 0.4729(2) 0.3937(3) 0.1029(18) Uani 1 1 d . . . 
H22A H 0.0792 0.5169 0.3891 0.123 Uiso 1 1 calc R . . 
C23 C 0.0664(3) 0.4364(2) 0.3394(3) 0.0886(15) Uani 1 1 d . . . 
H23A H 0.0574 0.4554 0.2974 0.106 Uiso 1 1 calc R . . 
C24 C 0.0672(2) 0.37198(18) 0.34411(19) 0.0590(10) Uani 1 1 d . . . 
H24A H 0.0582 0.3471 0.3057 0.071 Uiso 1 1 calc R . . 
C25 C 0.41212(18) 0.15345(15) 0.59296(17) 0.0420(8) Uani 1 1 d . . . 
C26 C 0.4070(2) 0.11961(18) 0.5336(2) 0.0572(10) Uani 1 1 d . . . 
H26A H 0.4001 0.1410 0.4927 0.069 Uiso 1 1 calc R . . 
C27 C 0.4122(3) 0.0543(2) 0.5345(3) 0.0864(16) Uani 1 1 d . . . 
H27A H 0.4088 0.0316 0.4943 0.104 Uiso 1 1 calc R . . 
C28 C 0.4221(3) 0.0230(2) 0.5933(3) 0.103(2) Uani 1 1 d . . . 
H28A H 0.4235 -0.0212 0.5937 0.124 Uiso 1 1 calc R . . 
C29 C 0.4299(3) 0.0554(2) 0.6513(3) 0.0905(16) Uani 1 1 d . . . 
H29A H 0.4384 0.0334 0.6917 0.109 Uiso 1 1 calc R . . 
C30 C 0.4256(2) 0.11981(17) 0.6519(2) 0.0582(10) Uani 1 1 d . . . 
H30A H 0.4318 0.1416 0.6926 0.070 Uiso 1 1 calc R . . 
C31 C 0.36581(18) 0.38374(14) 0.58783(15) 0.0368(7) Uani 1 1 d . . . 
C32 C 0.4210(2) 0.41992(15) 0.62836(16) 0.0460(8) Uani 1 1 d . . . 
H32A H 0.4812 0.4099 0.6316 0.055 Uiso 1 1 calc R . . 
C33 C 0.3893(2) 0.47008(17) 0.66390(17) 0.0552(9) Uani 1 1 d . . . 
H33A H 0.4280 0.4937 0.6912 0.066 Uiso 1 1 calc R . . 
C34 C 0.3023(3) 0.48616(16) 0.66011(17) 0.0581(10) Uani 1 1 d . . . 
H34A H 0.2806 0.5200 0.6852 0.070 Uiso 1 1 calc R . . 
C35 C 0.2472(2) 0.45196(17) 0.61896(18) 0.0603(10) Uani 1 1 d . . . 
H35A H 0.1877 0.4635 0.6147 0.072 Uiso 1 1 calc R . . 
C36 C 0.2778(2) 0.40078(15) 0.58357(17) 0.0482(8) Uani 1 1 d . . . 
H36A H 0.2387 0.3774 0.5564 0.058 Uiso 1 1 calc R . . 
C37 C -0.1579(2) 0.37436(17) 0.40007(19) 0.0622(10) Uani 1 1 d . . . 
H37A H -0.0958 0.3854 0.3954 0.075 Uiso 1 1 calc R . . 
H37B H -0.1899 0.4123 0.4132 0.075 Uiso 1 1 calc R . . 
C38 C -0.1942(2) 0.35018(17) 0.33558(19) 0.0627(10) Uani 1 1 d . . . 
H38A H -0.2564 0.3394 0.3403 0.075 Uiso 1 1 calc R . . 
H38B H -0.1899 0.3828 0.3012 0.075 Uiso 1 1 calc R . . 
C39 C -0.1854(2) 0.26911(17) 0.25953(18) 0.0587(10) Uani 1 1 d . . . 
H39A H -0.1899 0.3001 0.2234 0.070 Uiso 1 1 calc R . . 
H39B H -0.2447 0.2542 0.2693 0.070 Uiso 1 1 calc R . . 
C40 C -0.1298(2) 0.21558(18) 0.23887(17) 0.0569(9) Uani 1 1 d . . . 
H40A H -0.1544 0.1975 0.1975 0.068 Uiso 1 1 calc R . . 
H40B H -0.0706 0.2311 0.2296 0.068 Uiso 1 1 calc R . . 
C41 C -0.1998(2) 0.13303(17) 0.29434(18) 0.0549(9) Uani 1 1 d . . . 
H41A H -0.2211 0.1202 0.2499 0.066 Uiso 1 1 calc R . . 
H41B H -0.2452 0.1592 0.3145 0.066 Uiso 1 1 calc R . . 
C42 C -0.1838(2) 0.07592(17) 0.33654(17) 0.0542(9) Uani 1 1 d . . . 
H42A H -0.2387 0.0522 0.3410 0.065 Uiso 1 1 calc R . . 
H42B H -0.1406 0.0485 0.3154 0.065 Uiso 1 1 calc R . . 
C43 C -0.1435(2) 0.04480(15) 0.44571(17) 0.0505(8) Uani 1 1 d . . . 
H43A H -0.1184 0.0080 0.4235 0.061 Uiso 1 1 calc R . . 
H43B H -0.2014 0.0332 0.4623 0.061 Uiso 1 1 calc R . . 
C44 C -0.0845(2) 0.06491(16) 0.50269(16) 0.0477(8) Uani 1 1 d . . . 
H44A H -0.0820 0.0320 0.5370 0.057 Uiso 1 1 calc R . . 
H44B H -0.0248 0.0722 0.4870 0.057 Uiso 1 1 calc R . . 
C45 C -0.0644(2) 0.14561(17) 0.58011(16) 0.0486(8) Uani 1 1 d . . . 
H45A H -0.0055 0.1538 0.5633 0.058 Uiso 1 1 calc R . . 
H45B H -0.0593 0.1159 0.6174 0.058 Uiso 1 1 calc R . . 
C46 C -0.1053(2) 0.20510(17) 0.60238(16) 0.0523(9) Uani 1 1 d . . . 
H46A H -0.1667 0.1973 0.6139 0.063 Uiso 1 1 calc R . . 
H46B H -0.0741 0.2207 0.6423 0.063 Uiso 1 1 calc R . . 
C47 C -0.1592(3) 0.30098(19) 0.5626(2) 0.0741(12) Uani 1 1 d . . . 
H47A H -0.1486 0.3180 0.6075 0.089 Uiso 1 1 calc R . . 
H47B H -0.2203 0.2863 0.5595 0.089 Uiso 1 1 calc R . . 
C48 C -0.1451(3) 0.35033(19) 0.5128(2) 0.0729(12) Uani 1 1 d . . . 
H48A H -0.1818 0.3869 0.5228 0.087 Uiso 1 1 calc R . . 
H48B H -0.0834 0.3637 0.5147 0.087 Uiso 1 1 calc R . . 
C49 C 0.6095(3) 0.4417(2) 0.4960(2) 0.0767(12) Uani 1 1 d . . . 
H49A H 0.6625 0.4539 0.4721 0.092 Uiso 1 1 calc R . . 
H49B H 0.5749 0.4798 0.5041 0.092 Uiso 1 1 calc R . . 
C50 C 0.5581(3) 0.3978(2) 0.4557(2) 0.0864(15) Uani 1 1 d . . . 
H50A H 0.5010 0.3905 0.4761 0.104 Uiso 1 1 calc R . . 
H50B H 0.5476 0.4153 0.4110 0.104 Uiso 1 1 calc R . . 
C51 C 0.5642(3) 0.2964(2) 0.4092(2) 0.0834(15) Uani 1 1 d . . . 
H51A H 0.5613 0.3120 0.3632 0.100 Uiso 1 1 calc R . . 
H51B H 0.5042 0.2875 0.4235 0.100 Uiso 1 1 calc R . . 
C52 C 0.6183(3) 0.2384(2) 0.4130(2) 0.0796(13) Uani 1 1 d . . . 
H52A H 0.6004 0.2095 0.3772 0.096 Uiso 1 1 calc R . . 
H52B H 0.6804 0.2490 0.4074 0.096 Uiso 1 1 calc R . . 
C53 C 0.6672(2) 0.16025(19) 0.4865(2) 0.0644(11) Uani 1 1 d . . . 
H53A H 0.7274 0.1764 0.4843 0.077 Uiso 1 1 calc R . . 
H53B H 0.6593 0.1279 0.4520 0.077 Uiso 1 1 calc R . . 
C54 C 0.6529(2) 0.13225(17) 0.55325(19) 0.0585(10) Uani 1 1 d . . . 
H54A H 0.5933 0.1148 0.5552 0.070 Uiso 1 1 calc R . . 
H54B H 0.6949 0.0980 0.5614 0.070 Uiso 1 1 calc R . . 
C55 C 0.6621(2) 0.15370(17) 0.66805(18) 0.0546(9) Uani 1 1 d . . . 
H55A H 0.7069 0.1208 0.6737 0.066 Uiso 1 1 calc R . . 
H55B H 0.6044 0.1351 0.6763 0.066 Uiso 1 1 calc R . . 
C56 C 0.6796(2) 0.20573(18) 0.71581(18) 0.0575(10) Uani 1 1 d . . . 
H56A H 0.6875 0.1887 0.7610 0.069 Uiso 1 1 calc R . . 
H56B H 0.7338 0.2277 0.7040 0.069 Uiso 1 1 calc R . . 
C57 C 0.6202(2) 0.29686(18) 0.76170(17) 0.0567(9) Uani 1 1 d . . . 
H57A H 0.6400 0.2785 0.8043 0.068 Uiso 1 1 calc R . . 
H57B H 0.5634 0.3173 0.7688 0.068 Uiso 1 1 calc R . . 
C58 C 0.6852(2) 0.34527(19) 0.74069(18) 0.0624(10) Uani 1 1 d . . . 
H58A H 0.6954 0.3759 0.7767 0.075 Uiso 1 1 calc R . . 
H58B H 0.7414 0.3252 0.7305 0.075 Uiso 1 1 calc R . . 
C59 C 0.7060(3) 0.42210(18) 0.6609(2) 0.0654(10) Uani 1 1 d . . . 
H59A H 0.7617 0.4033 0.6472 0.079 Uiso 1 1 calc R . . 
H59B H 0.7190 0.4524 0.6967 0.079 Uiso 1 1 calc R . . 
C60 C 0.6632(3) 0.45538(19) 0.6029(2) 0.0818(13) Uani 1 1 d . . . 
H60A H 0.6140 0.4809 0.6184 0.098 Uiso 1 1 calc R . . 
H60B H 0.7057 0.4837 0.5823 0.098 Uiso 1 1 calc R . . 
  
loop_ 
 _atom_site_aniso_label 
 _atom_site_aniso_U_11 
 _atom_site_aniso_U_22 
 _atom_site_aniso_U_33 
 _atom_site_aniso_U_23 
 _atom_site_aniso_U_13 
 _atom_site_aniso_U_12 
Cu1 0.03072(19) 0.0318(2) 0.0307(2) 0.00113(15) -0.00271(14) -0.00146(14) 
Cu2 0.03028(18) 0.0309(2) 0.0333(2) 0.00008(15) -0.00254(14) -0.00187(14) 
K1 0.0351(3) 0.0373(4) 0.0368(4) -0.0025(3) -0.0027(3) 0.0032(3) 
K2 0.0371(3) 0.0394(4) 0.0390(4) 0.0000(3) -0.0026(3) 0.0038(3) 
O1 0.0333(10) 0.0426(12) 0.0326(12) 0.0075(9) -0.0039(8) -0.0087(9) 
O2 0.0330(9) 0.0425(12) 0.0320(11) 0.0072(9) -0.0049(8) -0.0081(9) 
O3 0.0323(9) 0.0333(11) 0.0443(12) -0.0061(10) -0.0011(8) -0.0016(8) 
O4 0.0426(11) 0.0381(12) 0.0505(14) 0.0079(10) -0.0160(10) -0.0043(9) 
O5 0.0384(11) 0.0363(12) 0.0514(14) 0.0047(10) -0.0142(9) -0.0030(9) 
O6 0.0326(10) 0.0320(12) 0.0583(14) -0.0066(10) -0.0007(9) -0.0056(9) 
O7 0.0629(14) 0.0533(15) 0.0588(17) -0.0010(13) 0.0008(12) 0.0129(12) 
O8 0.0575(13) 0.0528(15) 0.0587(16) 0.0010(12) -0.0102(12) 0.0121(12) 
O9 0.0619(14) 0.0549(15) 0.0401(13) -0.0024(12) -0.0071(11) 0.0071(12) 
O10 0.0602(13) 0.0391(13) 0.0458(14) -0.0049(11) -0.0017(11) -0.0054(10) 
O11 0.0447(11) 0.0541(15) 0.0449(14) -0.0028(11) -0.0024(10) 0.0025(10) 
O12 0.0615(14) 0.0535(14) 0.0438(15) -0.0050(12) 0.0079(11) 0.0057(12) 
O13 0.0793(17) 0.0504(16) 0.0755(19) 0.0087(15) -0.0020(14) -0.0100(13) 
O14 0.0657(16) 0.098(2) 0.0663(19) 0.0082(17) -0.0077(14) 0.0100(16) 
O15 0.0563(14) 0.0817(19) 0.0498(16) -0.0095(14) 0.0037(12) 0.0013(13) 
O16 0.0487(12) 0.0426(13) 0.0620(16) -0.0047(12) 0.0010(11) 0.0041(10) 
O17 0.0478(12) 0.0623(15) 0.0459(14) -0.0007(12) -0.0014(10) 0.0017(11) 
O18 0.0723(16) 0.0745(19) 0.0610(18) -0.0050(15) -0.0041(13) -0.0165(14) 
C1 0.0333(14) 0.0428(18) 0.0366(18) 0.0067(14) -0.0028(12) -0.0058(13) 
C2 0.075(2) 0.044(2) 0.049(2) 0.0045(17) 0.0135(18) -0.0099(18) 
C3 0.087(3) 0.052(2) 0.055(2) 0.011(2) 0.007(2) -0.023(2) 
C4 0.0455(18) 0.089(3) 0.041(2) 0.005(2) 0.0023(15) -0.0157(19) 
C5 0.053(2) 0.083(3) 0.044(2) -0.011(2) -0.0001(17) 0.0051(19) 
C6 0.0458(18) 0.051(2) 0.048(2) 0.0011(17) -0.0029(15) -0.0004(15) 
C7 0.0288(13) 0.0393(18) 0.0337(17) 0.0030(14) -0.0050(12) -0.0069(12) 
C8 0.0447(17) 0.044(2) 0.047(2) -0.0014(16) -0.0042(15) 0.0018(14) 
C9 0.0402(17) 0.078(3) 0.043(2) -0.016(2) 0.0023(15) -0.0005(17) 
C10 0.0486(18) 0.075(3) 0.0354(19) 0.0029(19) 0.0029(15) -0.0197(18) 
C11 0.065(2) 0.049(2) 0.048(2) 0.0110(18) 0.0000(17) -0.0170(17) 
C12 0.0509(17) 0.0386(18) 0.0381(19) 0.0008(15) 0.0014(14) -0.0050(14) 
C13 0.0374(14) 0.0286(16) 0.0349(17) 0.0053(13) 0.0052(12) -0.0020(12) 
C14 0.0394(15) 0.0406(18) 0.0347(17) 0.0035(14) -0.0006(13) -0.0029(13) 
C15 0.065(2) 0.042(2) 0.0378(19) -0.0052(16) -0.0011(15) -0.0035(16) 
C16 0.075(2) 0.0381(19) 0.045(2) -0.0043(16) 0.0058(17) 0.0165(17) 
C17 0.0540(19) 0.045(2) 0.054(2) 0.0011(17) -0.0013(16) 0.0158(16) 
C18 0.0434(16) 0.0418(19) 0.0427(19) -0.0001(15) -0.0049(14) 0.0046(14) 
C19 0.0343(15) 0.045(2) 0.0446(19) 0.0069(16) -0.0025(13) 0.0020(13) 
C20 0.0550(19) 0.059(2) 0.057(2) -0.0025(19) -0.0153(17) 0.0111(17) 
C21 0.090(3) 0.059(3) 0.099(4) -0.022(3) -0.035(3) 0.015(2) 
C22 0.124(4) 0.042(3) 0.141(5) 0.013(3) -0.037(4) 0.006(3) 
C23 0.121(4) 0.057(3) 0.088(4) 0.031(3) -0.017(3) 0.005(3) 
C24 0.067(2) 0.057(2) 0.053(2) 0.0110(19) -0.0020(18) 0.0059(18) 
C25 0.0314(14) 0.0390(19) 0.055(2) 0.0027(16) -0.0074(13) 0.0029(13) 
C26 0.0420(17) 0.057(2) 0.073(3) -0.009(2) -0.0124(17) 0.0076(16) 
C27 0.067(2) 0.070(3) 0.121(4) -0.043(3) -0.031(3) 0.020(2) 
C28 0.095(3) 0.040(3) 0.173(6) 0.003(3) -0.048(4) 0.005(2) 
C29 0.096(3) 0.051(3) 0.123(5) 0.031(3) -0.033(3) 0.003(2) 
C30 0.0538(19) 0.049(2) 0.071(3) 0.015(2) -0.0083(18) 0.0052(17) 
C31 0.0420(15) 0.0304(17) 0.0379(18) 0.0070(14) -0.0015(13) -0.0040(13) 
C32 0.0509(18) 0.0366(18) 0.050(2) 0.0034(16) -0.0064(15) -0.0049(15) 
C33 0.081(2) 0.041(2) 0.044(2) 0.0006(17) -0.0084(18) -0.0033(18) 
C34 0.094(3) 0.040(2) 0.041(2) -0.0019(16) -0.0011(19) 0.0169(19) 
C35 0.058(2) 0.063(3) 0.060(2) 0.002(2) -0.0015(18) 0.0251(18) 
C36 0.0504(18) 0.0427(19) 0.051(2) -0.0021(17) -0.0061(15) 0.0065(15) 
C37 0.062(2) 0.046(2) 0.079(3) 0.006(2) 0.003(2) 0.0160(18) 
C38 0.068(2) 0.052(2) 0.068(3) 0.011(2) -0.0043(19) 0.0232(19) 
C39 0.062(2) 0.065(3) 0.048(2) 0.0134(19) -0.0131(17) 0.0056(18) 
C40 0.064(2) 0.069(3) 0.038(2) 0.0085(19) -0.0050(16) 0.0107(19) 
C41 0.055(2) 0.056(2) 0.054(2) -0.0132(18) -0.0084(17) 0.0002(17) 
C42 0.067(2) 0.049(2) 0.046(2) -0.0117(17) -0.0081(17) -0.0082(17) 
C43 0.0575(19) 0.039(2) 0.055(2) 0.0002(17) 0.0095(16) -0.0059(15) 
C44 0.0551(19) 0.045(2) 0.043(2) 0.0063(16) 0.0068(15) 0.0052(16) 
C45 0.0477(17) 0.062(2) 0.0357(19) 0.0070(17) -0.0041(14) -0.0028(16) 
C46 0.0511(19) 0.071(3) 0.0348(19) -0.0040(18) -0.0020(15) -0.0003(18) 
C47 0.093(3) 0.067(3) 0.063(3) -0.016(2) 0.018(2) 0.019(2) 
C48 0.104(3) 0.058(3) 0.056(3) -0.011(2) 0.006(2) 0.020(2) 
C49 0.079(3) 0.070(3) 0.081(3) 0.033(3) 0.009(2) 0.009(2) 
C50 0.066(3) 0.092(4) 0.101(4) 0.053(3) -0.002(2) 0.003(3) 
C51 0.080(3) 0.120(4) 0.050(3) 0.017(3) -0.025(2) -0.018(3) 
C52 0.093(3) 0.099(4) 0.047(3) -0.015(2) 0.000(2) -0.014(3) 
C53 0.058(2) 0.066(3) 0.069(3) -0.027(2) 0.0031(19) 0.0119(19) 
C54 0.0476(18) 0.055(2) 0.073(3) -0.020(2) -0.0045(18) 0.0058(16) 
C55 0.0505(19) 0.052(2) 0.061(2) 0.0146(19) 0.0011(17) 0.0061(16) 
C56 0.0470(18) 0.073(3) 0.052(2) 0.015(2) -0.0033(16) 0.0039(18) 
C57 0.056(2) 0.076(3) 0.038(2) -0.0147(19) 0.0035(16) -0.0069(19) 
C58 0.063(2) 0.070(3) 0.054(2) -0.017(2) -0.0010(18) 0.000(2) 
C59 0.073(2) 0.054(2) 0.069(3) -0.009(2) 0.003(2) -0.020(2) 
C60 0.084(3) 0.048(2) 0.115(4) -0.009(3) 0.020(3) -0.009(2) 
  
_geom_special_details 
; 
 All esds (except the esd in the dihedral angle between two l.s. planes) 
 are estimated using the full covariance matrix.  The cell esds are taken 
 into account individually in the estimation of esds in distances, angles 
 and torsion angles; correlations between esds in cell parameters are only 
 used when they are defined by crystal symmetry.  An approximate (isotropic) 
 treatment of cell esds is used for estimating esds involving l.s. planes. 
; 
  
loop_ 
 _geom_bond_atom_site_label_1 
 _geom_bond_atom_site_label_2 
 _geom_bond_distance 
 _geom_bond_site_symmetry_2 
 _geom_bond_publ_flag 
Cu1 O4 1.8823(19) . ? 
Cu1 O3 1.9046(19) . ? 
Cu1 O1 1.9473(19) . ? 
Cu1 O2 1.9527(19) . ? 
Cu1 Cu2 3.0483(9) . ? 
Cu1 K1 3.6274(13) . ? 
Cu2 O5 1.8835(19) . ? 
Cu2 O6 1.8990(19) . ? 
Cu2 O1 1.9577(19) . ? 
Cu2 O2 1.9608(19) . ? 
Cu2 K2 3.6553(13) . ? 
K1 O4 2.715(2) . ? 
K1 O3 2.743(2) . ? 
K1 O12 2.832(3) . ? 
K1 O10 2.854(2) . ? 
K1 O7 2.866(2) . ? 
K1 O9 2.878(2) . ? 
K1 O8 2.890(2) . ? 
K1 O11 3.107(2) . ? 
K2 O6 2.722(2) . ? 
K2 O5 2.792(2) . ? 
K2 O17 2.812(2) . ? 
K2 O16 2.814(2) . ? 
K2 O15 2.847(3) . ? 
K2 O13 2.950(3) . ? 
K2 O14 2.993(3) . ? 
K2 O18 3.042(3) . ? 
K2 C50 3.485(4) . ? 
K2 C51 3.518(4) . ? 
O1 C1 1.358(4) . ? 
O2 C7 1.355(3) . ? 
O3 C13 1.326(3) . ? 
O4 C19 1.322(4) . ? 
O5 C25 1.318(4) . ? 
O6 C31 1.324(4) . ? 
O7 C37 1.394(4) . ? 
O7 C48 1.402(4) . ? 
O8 C38 1.394(4) . ? 
O8 C39 1.397(4) . ? 
O9 C41 1.374(4) . ? 
O9 C40 1.428(4) . ? 
O10 C43 1.408(4) . ? 
O10 C42 1.412(4) . ? 
O11 C44 1.401(4) . ? 
O11 C45 1.402(3) . ? 
O12 C47 1.402(4) . ? 
O12 C46 1.404(4) . ? 
O13 C60 1.346(5) . ? 
O13 C49 1.410(4) . ? 
O14 C50 1.376(5) . ? 
O14 C51 1.405(5) . ? 
O15 C52 1.399(5) . ? 
O15 C53 1.405(4) . ? 
O16 C54 1.387(4) . ? 
O16 C55 1.432(4) . ? 
O17 C56 1.400(4) . ? 
O17 C57 1.419(4) . ? 
O18 C59 1.385(4) . ? 
O18 C58 1.392(4) . ? 
C1 C2 1.365(4) . ? 
C1 C6 1.376(5) . ? 
C2 C3 1.388(5) . ? 
C3 C4 1.347(5) . ? 
C4 C5 1.359(5) . ? 
C5 C6 1.375(5) . ? 
C7 C8 1.376(4) . ? 
C7 C12 1.384(4) . ? 
C8 C9 1.373(5) . ? 
C9 C10 1.373(5) . ? 
C10 C11 1.357(5) . ? 
C11 C12 1.380(4) . ? 
C13 C18 1.383(4) . ? 
C13 C14 1.404(4) . ? 
C14 C15 1.374(4) . ? 
C15 C16 1.372(5) . ? 
C16 C17 1.374(5) . ? 
C17 C18 1.371(4) . ? 
C19 C20 1.372(5) . ? 
C19 C24 1.395(4) . ? 
C20 C21 1.399(6) . ? 
C21 C22 1.358(7) . ? 
C22 C23 1.345(7) . ? 
C23 C24 1.371(6) . ? 
C25 C26 1.391(5) . ? 
C25 C30 1.392(5) . ? 
C26 C27 1.389(6) . ? 
C27 C28 1.358(7) . ? 
C28 C29 1.354(7) . ? 
C29 C30 1.369(6) . ? 
C31 C36 1.387(4) . ? 
C31 C32 1.387(4) . ? 
C32 C33 1.374(5) . ? 
C33 C34 1.367(5) . ? 
C34 C35 1.371(5) . ? 
C35 C36 1.384(5) . ? 
C37 C38 1.486(5) . ? 
C39 C40 1.480(5) . ? 
C41 C42 1.495(5) . ? 
C43 C44 1.499(4) . ? 
C45 C46 1.481(5) . ? 
C47 C48 1.466(6) . ? 
C49 C50 1.451(6) . ? 
C51 C52 1.481(6) . ? 
C53 C54 1.483(5) . ? 
C55 C56 1.482(5) . ? 
C57 C58 1.492(5) . ? 
C59 C60 1.499(5) . ? 
  
loop_ 
 _geom_angle_atom_site_label_1 
 _geom_angle_atom_site_label_2 
 _geom_angle_atom_site_label_3 
 _geom_angle 
 _geom_angle_site_symmetry_1 
 _geom_angle_site_symmetry_3 
 _geom_angle_publ_flag 
O4 Cu1 O3 89.35(8) . . ? 
O4 Cu1 O1 99.22(9) . . ? 
O3 Cu1 O1 159.83(9) . . ? 
O4 Cu1 O2 158.62(9) . . ? 
O3 Cu1 O2 100.62(8) . . ? 
O1 Cu1 O2 77.73(8) . . ? 
O4 Cu1 Cu2 134.18(7) . . ? 
O3 Cu1 Cu2 136.45(6) . . ? 
O1 Cu1 Cu2 38.80(6) . . ? 
O2 Cu1 Cu2 38.93(6) . . ? 
O4 Cu1 K1 46.91(6) . . ? 
O3 Cu1 K1 47.91(6) . . ? 
O1 Cu1 K1 145.65(6) . . ? 
O2 Cu1 K1 130.77(6) . . ? 
Cu2 Cu1 K1 161.304(19) . . ? 
O5 Cu2 O6 89.55(9) . . ? 
O5 Cu2 O1 159.85(9) . . ? 
O6 Cu2 O1 99.64(9) . . ? 
O5 Cu2 O2 99.87(9) . . ? 
O6 Cu2 O2 160.04(9) . . ? 
O1 Cu2 O2 77.30(8) . . ? 
O5 Cu2 Cu1 135.62(6) . . ? 
O6 Cu2 Cu1 134.83(6) . . ? 
O1 Cu2 Cu1 38.56(6) . . ? 
O2 Cu2 Cu1 38.74(5) . . ? 
O5 Cu2 K2 48.54(6) . . ? 
O6 Cu2 K2 46.49(6) . . ? 
O1 Cu2 K2 129.58(6) . . ? 
O2 Cu2 K2 147.89(6) . . ? 
Cu1 Cu2 K2 162.196(19) . . ? 
O4 K1 O3 58.40(6) . . ? 
O4 K1 O12 94.69(7) . . ? 
O3 K1 O12 95.09(7) . . ? 
O4 K1 O10 144.94(7) . . ? 
O3 K1 O10 91.15(6) . . ? 
O12 K1 O10 105.84(7) . . ? 
O4 K1 O7 91.13(7) . . ? 
O3 K1 O7 139.58(6) . . ? 
O12 K1 O7 58.79(7) . . ? 
O10 K1 O7 123.77(7) . . ? 
O4 K1 O9 110.31(7) . . ? 
O3 K1 O9 104.73(6) . . ? 
O12 K1 O9 153.71(7) . . ? 
O10 K1 O9 57.45(7) . . ? 
O7 K1 O9 111.01(7) . . ? 
O4 K1 O8 88.74(7) . . ? 
O3 K1 O8 137.17(7) . . ? 
O12 K1 O8 115.88(7) . . ? 
O10 K1 O8 106.56(7) . . ? 
O7 K1 O8 57.14(7) . . ? 
O9 K1 O8 58.74(7) . . ? 
O4 K1 O11 126.15(6) . . ? 
O3 K1 O11 78.51(6) . . ? 
O12 K1 O11 56.13(7) . . ? 
O10 K1 O11 53.29(6) . . ? 
O7 K1 O11 104.97(7) . . ? 
O9 K1 O11 110.72(7) . . ? 
O8 K1 O11 142.98(6) . . ? 
O4 K1 Cu1 30.42(4) . . ? 
O3 K1 Cu1 31.02(4) . . ? 
O12 K1 Cu1 85.62(5) . . ? 
O10 K1 Cu1 122.16(5) . . ? 
O7 K1 Cu1 110.78(5) . . ? 
O9 K1 Cu1 120.11(5) . . ? 
O8 K1 Cu1 118.75(5) . . ? 
O11 K1 Cu1 97.50(4) . . ? 
O6 K2 O5 57.77(6) . . ? 
O6 K2 O17 121.84(7) . . ? 
O5 K2 O17 88.22(6) . . ? 
O6 K2 O16 146.51(6) . . ? 
O5 K2 O16 90.25(7) . . ? 
O17 K2 O16 60.50(7) . . ? 
O6 K2 O15 106.77(7) . . ? 
O5 K2 O15 87.68(7) . . ? 
O17 K2 O15 118.30(8) . . ? 
O16 K2 O15 57.99(7) . . ? 
O6 K2 O13 88.08(7) . . ? 
O5 K2 O13 145.75(7) . . ? 
O17 K2 O13 110.41(7) . . ? 
O16 K2 O13 123.82(7) . . ? 
O15 K2 O13 106.53(8) . . ? 
O6 K2 O14 82.96(7) . . ? 
O5 K2 O14 118.33(7) . . ? 
O17 K2 O14 151.86(7) . . ? 
O16 K2 O14 107.18(8) . . ? 
O15 K2 O14 58.36(9) . . ? 
O13 K2 O14 52.85(8) . . ? 
O6 K2 O18 107.96(7) . . ? 
O5 K2 O18 130.66(7) . . ? 
O17 K2 O18 58.05(7) . . ? 
O16 K2 O18 100.43(7) . . ? 
O15 K2 O18 138.34(7) . . ? 
O13 K2 O18 53.01(8) . . ? 
O14 K2 O18 104.22(8) . . ? 
O6 K2 C50 66.11(8) . . ? 
O5 K2 C50 115.29(8) . . ? 
O17 K2 C50 152.01(10) . . ? 
O16 K2 C50 129.85(10) . . ? 
O15 K2 C50 79.60(11) . . ? 
O13 K2 C50 41.62(9) . . ? 
O14 K2 C50 22.95(9) . . ? 
O18 K2 C50 94.11(10) . . ? 
O6 K2 C51 78.35(9) . . ? 
O5 K2 C51 97.74(8) . . ? 
O17 K2 C51 158.26(10) . . ? 
O16 K2 C51 98.41(10) . . ? 
O15 K2 C51 41.71(10) . . ? 
O13 K2 C51 75.72(10) . . ? 
O14 K2 C51 23.16(9) . . ? 
O18 K2 C51 127.33(9) . . ? 
C50 K2 C51 39.18(12) . . ? 
O6 K2 Cu2 30.39(4) . . ? 
O5 K2 Cu2 30.38(4) . . ? 
O17 K2 Cu2 114.21(5) . . ? 
O16 K2 Cu2 116.11(5) . . ? 
O15 K2 Cu2 88.87(5) . . ? 
O13 K2 Cu2 117.05(5) . . ? 
O14 K2 Cu2 93.90(5) . . ? 
O18 K2 Cu2 132.05(6) . . ? 
C50 K2 Cu2 85.73(7) . . ? 
C51 K2 Cu2 78.57(7) . . ? 
C1 O1 Cu1 122.22(17) . . ? 
C1 O1 Cu2 122.36(16) . . ? 
Cu1 O1 Cu2 102.64(9) . . ? 
C7 O2 Cu1 122.93(15) . . ? 
C7 O2 Cu2 122.57(16) . . ? 
Cu1 O2 Cu2 102.32(9) . . ? 
C13 O3 Cu1 120.52(17) . . ? 
C13 O3 K1 125.31(16) . . ? 
Cu1 O3 K1 101.08(8) . . ? 
C19 O4 Cu1 124.93(18) . . ? 
C19 O4 K1 121.21(17) . . ? 
Cu1 O4 K1 102.68(9) . . ? 
C25 O5 Cu2 122.40(18) . . ? 
C25 O5 K2 120.25(17) . . ? 
Cu2 O5 K2 101.08(9) . . ? 
C31 O6 Cu2 120.47(17) . . ? 
C31 O6 K2 121.88(16) . . ? 
Cu2 O6 K2 103.12(8) . . ? 
C37 O7 C48 112.2(3) . . ? 
C37 O7 K1 112.6(2) . . ? 
C48 O7 K1 112.0(2) . . ? 
C38 O8 C39 111.3(3) . . ? 
C38 O8 K1 119.4(2) . . ? 
C39 O8 K1 118.15(19) . . ? 
C41 O9 C40 113.5(2) . . ? 
C41 O9 K1 109.23(19) . . ? 
C40 O9 K1 112.69(19) . . ? 
C43 O10 C42 113.2(2) . . ? 
C43 O10 K1 124.37(17) . . ? 
C42 O10 K1 120.42(19) . . ? 
C44 O11 C45 112.2(2) . . ? 
C44 O11 K1 100.30(18) . . ? 
C45 O11 K1 97.76(18) . . ? 
C47 O12 C46 112.1(3) . . ? 
C47 O12 K1 117.8(2) . . ? 
C46 O12 K1 121.13(19) . . ? 
C60 O13 C49 112.7(3) . . ? 
C60 O13 K2 126.7(3) . . ? 
C49 O13 K2 117.1(2) . . ? 
C50 O14 C51 115.2(3) . . ? 
C50 O14 K2 99.0(2) . . ? 
C51 O14 K2 99.9(2) . . ? 
C52 O15 C53 112.4(3) . . ? 
C52 O15 K2 117.8(2) . . ? 
C53 O15 K2 118.5(2) . . ? 
C54 O16 C55 112.7(3) . . ? 
C54 O16 K2 115.85(19) . . ? 
C55 O16 K2 113.14(18) . . ? 
C56 O17 C57 111.6(3) . . ? 
C56 O17 K2 113.6(2) . . ? 
C57 O17 K2 115.4(2) . . ? 
C59 O18 C58 112.6(3) . . ? 
C59 O18 K2 119.1(2) . . ? 
C58 O18 K2 114.1(2) . . ? 
O1 C1 C2 120.7(3) . . ? 
O1 C1 C6 121.0(3) . . ? 
C2 C1 C6 118.3(3) . . ? 
C1 C2 C3 120.1(4) . . ? 
C4 C3 C2 120.6(4) . . ? 
C3 C4 C5 120.3(4) . . ? 
C4 C5 C6 119.4(4) . . ? 
C1 C6 C5 121.4(3) . . ? 
O2 C7 C8 121.2(3) . . ? 
O2 C7 C12 120.1(3) . . ? 
C8 C7 C12 118.6(3) . . ? 
C9 C8 C7 121.0(3) . . ? 
C10 C9 C8 120.2(3) . . ? 
C11 C10 C9 119.2(3) . . ? 
C10 C11 C12 121.4(3) . . ? 
C11 C12 C7 119.6(3) . . ? 
O3 C13 C18 123.8(3) . . ? 
O3 C13 C14 119.0(2) . . ? 
C18 C13 C14 117.2(3) . . ? 
C15 C14 C13 121.2(3) . . ? 
C16 C15 C14 120.6(3) . . ? 
C15 C16 C17 118.5(3) . . ? 
C18 C17 C16 121.7(3) . . ? 
C17 C18 C13 120.7(3) . . ? 
O4 C19 C20 122.9(3) . . ? 
O4 C19 C24 118.4(3) . . ? 
C20 C19 C24 118.6(3) . . ? 
C19 C20 C21 120.3(4) . . ? 
C22 C21 C20 119.4(4) . . ? 
C23 C22 C21 120.7(4) . . ? 
C22 C23 C24 121.2(4) . . ? 
C23 C24 C19 119.7(4) . . ? 
O5 C25 C26 122.5(3) . . ? 
O5 C25 C30 119.7(3) . . ? 
C26 C25 C30 117.7(3) . . ? 
C27 C26 C25 120.1(4) . . ? 
C28 C27 C26 120.3(4) . . ? 
C29 C28 C27 120.2(4) . . ? 
C28 C29 C30 120.7(5) . . ? 
C29 C30 C25 120.8(4) . . ? 
O6 C31 C36 122.8(3) . . ? 
O6 C31 C32 119.7(3) . . ? 
C36 C31 C32 117.5(3) . . ? 
C33 C32 C31 121.2(3) . . ? 
C34 C33 C32 121.0(3) . . ? 
C33 C34 C35 118.6(3) . . ? 
C34 C35 C36 121.1(3) . . ? 
C35 C36 C31 120.5(3) . . ? 
O7 C37 C38 109.0(3) . . ? 
O8 C38 C37 109.8(3) . . ? 
O8 C39 C40 108.9(3) . . ? 
O9 C40 C39 112.5(3) . . ? 
O9 C41 C42 110.7(3) . . ? 
O10 C42 C41 109.0(3) . . ? 
O10 C43 C44 108.9(3) . . ? 
O11 C44 C43 108.0(3) . . ? 
O11 C45 C46 107.3(2) . . ? 
O12 C46 C45 110.1(3) . . ? 
O12 C47 C48 109.8(3) . . ? 
O7 C48 C47 110.3(3) . . ? 
O13 C49 C50 109.8(3) . . ? 
O14 C50 C49 109.0(3) . . ? 
O14 C50 K2 58.01(19) . . ? 
C49 C50 K2 91.3(2) . . ? 
O14 C51 C52 108.2(3) . . ? 
O14 C51 K2 56.94(19) . . ? 
C52 C51 K2 85.6(2) . . ? 
O15 C52 C51 109.4(4) . . ? 
O15 C53 C54 109.9(3) . . ? 
O16 C54 C53 109.2(3) . . ? 
O16 C55 C56 108.7(3) . . ? 
O17 C56 C55 109.5(3) . . ? 
O17 C57 C58 112.7(3) . . ? 
O18 C58 C57 107.9(3) . . ? 
O18 C59 C60 110.0(3) . . ? 
O13 C60 C59 110.4(3) . . ? 
  
_diffrn_measured_fraction_theta_max    0.999 
_diffrn_reflns_theta_full              25.00 
_diffrn_measured_fraction_theta_full   0.999 
_refine_diff_density_max    0.794 
_refine_diff_density_min   -0.232 
_refine_diff_density_rms    0.082 
#===END
data_Compound11
  
_audit_creation_method            SHELXL-97 
# 1. SUBMISSION DETAILS                                                         
_publ_contact_author_name                       'Linda H. Doerrer'              
_publ_contact_author_address                                                    
;                                                                               
Barnard College, Chemistry Department                                           
3009 Broadway                                                                   
New York, NY, 10027                                                             
;                                                                               
_publ_contact_author_phone                      ' 212-854-2074 '                
_publ_contact_author_fax                        ' 212-854-2310 '                
_publ_contact_author_email        ' ldoerrer@barnard.edu '                      
_publ_requested_journal                         'Inorganic Chemistry'           
_publ_requested_coeditor_name                   ' Prof James Mayer '            
#============================================================================== 
# 3. TITLE AND AUTHOR LIST                                                      
_publ_section_title                                                             
;                                                                               
Homoleptic Cobalt and Copper Phenolate A2[M(OAr)4] Compounds
The Effect of Phenoxide Fluorination
;                                                                               
# The loop structure below should contain the names and addresses of all        
# authors, in the required order of publication. Repeat as necessary.           
loop_                                                                           
        _publ_author_name                                                       
        _publ_author_address                                                    
        _publ_author_footnote                                                   
'Buzzeo, Marisa C.'                               #<--'Last name, first name'   
;                                                                               
Barnard College, Chemistry Department                                           
3009 Broadway                                                                   
New York, NY, 10027                                                             
;                                                                               
'Iqbal, Amber H.'                                                               
;                                                                               
Barnard College, Chemistry Department                                           
3009 Broadway                                                                   
New York, NY, 10027                                                             
;                                                                               
'Long, Charli M.'                                                               
;                                                                               
Barnard College, Chemistry Department                                           
3009 Broadway                                                                   
New York, NY, 10027                                                             
;                                                                               
'Millar, David'                                                                 
;                                                                               
Barnard College, Chemistry Department                                           
3009 Broadway                                                                   
New York, NY, 10027                                                             
;                                                                               
'Patel, Sonal'                                                                  
;                                                                               
Barnard College, Chemistry Department                                           
3009 Broadway                                                                   
New York, NY, 10027                                                             
;                                                                               
'Pellow, Matthew A.'                                                            
;                                                                               
Barnard College, Chemistry Department                                           
3009 Broadway                                                                   
New York, NY, 10027                                                             
;                                                                               
'Saddoughi, Sahar A.'                                                           
;                                                                               
Barnard College, Chemistry Department                                           
3009 Broadway                                                                   
New York, NY, 10027                                                             
;                                                                               
'Smenton, Abigail L.'                                                           
;                                                                               
Barnard College, Chemistry Department                                           
3009 Broadway                                                                   
New York, NY, 10027                                                             
;                                                                               
'Turner, John F. C.'                                                            
;                                                                               
Department of Chemistry                                                         
408 Buehler Hall                                                                
University of Tennessee                                                         
Knoxville, TN 37996                                                             
;                                                                               
'Wadhawan, Jay D.'                                                              
;                                                                               
Physical and Theoretical Chemistry Laboratory                                   
University of Oxford                                                            
OXFORD OX1 3QZ, UK                                                              
;                                                                               
'Compton, Richard G.'
;                                                                          
Physical and Theoretical Chemistry Laboratory                                   
University of Oxford                                                            
OXFORD OX1 3QZ, UK                                                              
;                                                                               
'Golen, James A.'                                                               
;                                                                               
Department of Chemistry and Biochemistry                                        
MC 0358                                                                         
University of California, San Diego                                             
9500 Gilman Drive                                                               
La Jolla, CA 92093                                                              
;
;                                                                               
permanent address is the Department of Chemistry & Biochemistry, University of  
Massachusetts Dartmouth, North Dartmouth MA 02747                               
;                                                                               
'Rheingold, Arnold L.'                                                          
;                                                                               
Department of Chemistry and Biochemistry                                        
MC 0358                                                                         
University of California, San Diego                                             
9500 Gilman Drive                                                               
La Jolla, CA 92093                                                              
;                                                                               
#============================================================================== 
_chemical_name_systematic 
; 
 ? 
; 
_chemical_name_common             ? 
_chemical_melting_point           ? 
_chemical_formula_moiety          ?
_chemical_formula_sum 
 'C62 H82 Cl4 Co2 K2 O18' 
_chemical_formula_weight          1453.14 
  
loop_ 
 _atom_type_symbol 
 _atom_type_description 
 _atom_type_scat_dispersion_real 
 _atom_type_scat_dispersion_imag 
 _atom_type_scat_source 
 'C'  'C'   0.0033   0.0016 
 'International Tables Vol C Tables 4.2.6.8 and 6.1.1.4' 
 'H'  'H'   0.0000   0.0000 
 'International Tables Vol C Tables 4.2.6.8 and 6.1.1.4' 
 'O'  'O'   0.0106   0.0060 
 'International Tables Vol C Tables 4.2.6.8 and 6.1.1.4' 
 'K'  'K'   0.2009   0.2494 
 'International Tables Vol C Tables 4.2.6.8 and 6.1.1.4' 
 'Co'  'Co'   0.3494   0.9721 
 'International Tables Vol C Tables 4.2.6.8 and 6.1.1.4' 
 'Cl'  'Cl'   0.1484   0.1585 
 'International Tables Vol C Tables 4.2.6.8 and 6.1.1.4' 
  
_symmetry_cell_setting            Monoclinic 
_symmetry_space_group_name_H-M    P2(1)/n 
  
loop_ 
 _symmetry_equiv_pos_as_xyz 
 'x, y, z' 
 '-x+1/2, y+1/2, -z+1/2' 
 '-x, -y, -z' 
 'x-1/2, -y-1/2, z-1/2' 
  
_cell_length_a                    13.487(4) 
_cell_length_b                    15.672(4) 
_cell_length_c                    16.844(4) 
_cell_angle_alpha                 90.00 
_cell_angle_beta                  105.970(6) 
_cell_angle_gamma                 90.00 
_cell_volume                      3422.9(15) 
_cell_formula_units_Z             2 
_cell_measurement_temperature     218(2) 
_cell_measurement_reflns_used     4120 
_cell_measurement_theta_min       2.27 
_cell_measurement_theta_max       23.22 
  
_exptl_crystal_description        CHUNKS 
_exptl_crystal_colour             GREEN 
_exptl_crystal_size_max           0.30 
_exptl_crystal_size_mid           0.20 
_exptl_crystal_size_min           0.08 
_exptl_crystal_density_meas       'none' 
_exptl_crystal_density_diffrn     1.410 
_exptl_crystal_density_method     'not measured' 
_exptl_crystal_F_000              1516 
_exptl_absorpt_coefficient_mu     0.829 
_exptl_absorpt_correction_type    'Multi-scan' 
_exptl_absorpt_correction_T_min   0.664 
_exptl_absorpt_correction_T_max   1.000 
_exptl_absorpt_process_details    'SADABS' 
  
_exptl_special_details 
; 
 ? 
; 
  
_diffrn_ambient_temperature       218(2) 
_diffrn_radiation_wavelength      0.71073 
_diffrn_radiation_type            MoK\a 
_diffrn_radiation_source          'fine-focus sealed tube' 
_diffrn_radiation_monochromator   graphite 
_diffrn_measurement_device_type   'CCD area detector' 
_diffrn_measurement_method        'phi and omega scans' 
_diffrn_detector_area_resol_mean  ? 
_diffrn_standards_number          ? 
_diffrn_standards_interval_count  ? 
_diffrn_standards_interval_time   ? 
_diffrn_standards_decay_%         ? 
_diffrn_reflns_number             18579 
_diffrn_reflns_av_R_equivalents   0.0888 
_diffrn_reflns_av_sigmaI/netI     0.1116 
_diffrn_reflns_limit_h_min        -14 
_diffrn_reflns_limit_h_max        15 
_diffrn_reflns_limit_k_min        -17 
_diffrn_reflns_limit_k_max        16 
_diffrn_reflns_limit_l_min        -19 
_diffrn_reflns_limit_l_max        19 
_diffrn_reflns_theta_min          1.72 
_diffrn_reflns_theta_max          24.00 
_reflns_number_total              5378 
_reflns_number_gt                 3748 
_reflns_threshold_expression      >2sigma(I) 
  
_computing_data_collection        'Bruker SMART' 
_computing_cell_refinement        'Bruker SMART' 
_computing_data_reduction         'Bruker SAINT' 
_computing_structure_solution     'SHELXS-97 (Sheldrick, 1990)' 
_computing_structure_refinement   'SHELXL-97 (Sheldrick, 1997)' 
_computing_molecular_graphics     'Bruker SHELXTL' 
_computing_publication_material   'Bruker SHELXTL' 
  
_refine_special_details 
; 
 Refinement of F^2^ against ALL reflections.  The weighted R-factor wR and 
 goodness of fit S are based on F^2^, conventional R-factors R are based 
 on F, with F set to zero for negative F^2^. The threshold expression of 
 F^2^ > 2sigma(F^2^) is used only for calculating R-factors(gt) etc. and is 
 not relevant to the choice of reflections for refinement.  R-factors based 
 on F^2^ are statistically about twice as large as those based on F, and R- 
 factors based on ALL data will be even larger. 
; 
  
_refine_ls_structure_factor_coef  Fsqd 
_refine_ls_matrix_type            full 
_refine_ls_weighting_scheme       calc 
_refine_ls_weighting_details 
 'calc w=1/[\s^2^(Fo^2^)+(0.0487P)^2^+0.7361P] where P=(Fo^2^+2Fc^2^)/3' 
_atom_sites_solution_primary      direct 
_atom_sites_solution_secondary    difmap 
_atom_sites_solution_hydrogens    geom 
_refine_ls_hydrogen_treatment     mixed 
_refine_ls_extinction_method      none 
_refine_ls_extinction_coef        ? 
_refine_ls_number_reflns          5378 
_refine_ls_number_parameters      397 
_refine_ls_number_restraints      0 
_refine_ls_R_factor_all           0.1042 
_refine_ls_R_factor_gt            0.0680 
_refine_ls_wR_factor_ref          0.1664 
_refine_ls_wR_factor_gt           0.1509 
_refine_ls_goodness_of_fit_ref    1.104 
_refine_ls_restrained_S_all       1.104 
_refine_ls_shift/su_max           0.000 
_refine_ls_shift/su_mean          0.000 
  
loop_ 
 _atom_site_label 
 _atom_site_type_symbol 
 _atom_site_fract_x 
 _atom_site_fract_y 
 _atom_site_fract_z 
 _atom_site_U_iso_or_equiv 
 _atom_site_adp_type 
 _atom_site_occupancy 
 _atom_site_symmetry_multiplicity 
 _atom_site_calc_flag 
 _atom_site_refinement_flags 
 _atom_site_disorder_assembly 
 _atom_site_disorder_group 
K1 K -0.01151(9) 0.28275(8) 0.34227(7) 0.0401(3) Uani 1 1 d . . . 
Co1 Co 0.03455(6) 0.04468(5) 0.08272(4) 0.0347(2) Uani 1 1 d . . . 
Cl1 Cl 0.12681(15) 0.52322(12) 0.08324(11) 0.0741(6) Uani 1 1 d . . . 
Cl2 Cl 0.31363(18) 0.42512(15) 0.11290(14) 0.1003(7) Uani 1 1 d . . . 
O1 O -0.0118(3) -0.0685(2) 0.03759(19) 0.0365(9) Uani 1 1 d . . . 
O2 O 0.1719(3) 0.0547(2) 0.1531(2) 0.0439(10) Uani 1 1 d . . . 
O3 O -0.0636(3) 0.1141(2) 0.1146(2) 0.0453(10) Uani 1 1 d . . . 
O4 O 0.1902(3) 0.2230(3) 0.3642(3) 0.0535(11) Uani 1 1 d . . . 
O5 O 0.0872(3) 0.3203(3) 0.2229(2) 0.0483(10) Uani 1 1 d . . . 
O6 O -0.1208(3) 0.3700(2) 0.2012(2) 0.0413(9) Uani 1 1 d . . . 
O7 O -0.1834(3) 0.3803(2) 0.3445(2) 0.0444(10) Uani 1 1 d . . . 
O8 O -0.0944(3) 0.2723(3) 0.4779(2) 0.0520(11) Uani 1 1 d . . . 
O9 O 0.1123(3) 0.2327(3) 0.5004(2) 0.0546(11) Uani 1 1 d . . . 
C1 C -0.0176(4) -0.1426(4) 0.0759(3) 0.0340(13) Uani 1 1 d . . . 
C2 C -0.0563(5) -0.2150(3) 0.0305(3) 0.0413(15) Uani 1 1 d . . . 
H2A H -0.0777 -0.2124 -0.0275 0.050 Uiso 1 1 calc R . . 
C3 C -0.0635(5) -0.2898(4) 0.0695(4) 0.0534(17) Uani 1 1 d . . . 
H3A H -0.0895 -0.3381 0.0375 0.064 Uiso 1 1 calc R . . 
C4 C -0.0347(5) -0.2972(4) 0.1525(4) 0.0542(17) Uani 1 1 d . . . 
H4A H -0.0400 -0.3497 0.1781 0.065 Uiso 1 1 calc R . . 
C5 C 0.0022(5) -0.2264(5) 0.1981(4) 0.0576(18) Uani 1 1 d . . . 
H5A H 0.0214 -0.2300 0.2560 0.069 Uiso 1 1 calc R . . 
C6 C 0.0118(4) -0.1498(4) 0.1610(3) 0.0429(14) Uani 1 1 d . . . 
H6A H 0.0385 -0.1021 0.1938 0.052 Uiso 1 1 calc R . . 
C7 C 0.2567(5) 0.0300(3) 0.1354(3) 0.0389(14) Uani 1 1 d . . . 
C8 C 0.2576(5) -0.0260(3) 0.0722(3) 0.0441(14) Uani 1 1 d . . . 
H8A H 0.1947 -0.0478 0.0394 0.053 Uiso 1 1 calc R . . 
C9 C 0.3482(5) -0.0508(4) 0.0558(4) 0.0559(17) Uani 1 1 d . . . 
H9A H 0.3465 -0.0893 0.0126 0.067 Uiso 1 1 calc R . . 
C10 C 0.4403(5) -0.0195(4) 0.1024(4) 0.0510(16) Uani 1 1 d . . . 
H10A H 0.5025 -0.0364 0.0922 0.061 Uiso 1 1 calc R . . 
C11 C 0.4401(5) 0.0370(4) 0.1642(3) 0.0499(16) Uani 1 1 d . . . 
H11A H 0.5030 0.0594 0.1962 0.060 Uiso 1 1 calc R . . 
C12 C 0.3509(4) 0.0615(4) 0.1807(3) 0.0418(14) Uani 1 1 d . . . 
H12A H 0.3535 0.1006 0.2235 0.050 Uiso 1 1 calc R . . 
C13 C -0.0911(5) 0.1120(3) 0.1837(3) 0.0401(14) Uani 1 1 d . . . 
C14 C -0.1849(5) 0.1451(4) 0.1861(4) 0.0528(17) Uani 1 1 d . . . 
H14A H -0.2298 0.1679 0.1379 0.063 Uiso 1 1 calc R . . 
C15 C -0.2134(6) 0.1448(4) 0.2590(5) 0.063(2) Uani 1 1 d . . . 
H15A H -0.2845 0.1616 0.2582 0.076 Uiso 1 1 calc R . . 
C16 C -0.1497(7) 0.1115(4) 0.3294(4) 0.067(2) Uani 1 1 d . . . 
H16A H -0.1786 0.0968 0.3757 0.080 Uiso 1 1 calc R . . 
C17 C -0.0569(6) 0.0788(4) 0.3286(4) 0.0591(19) Uani 1 1 d . . . 
H17A H -0.0198 0.0409 0.3742 0.071 Uiso 1 1 calc R . . 
C18 C -0.0289(5) 0.0790(4) 0.2555(3) 0.0444(15) Uani 1 1 d . . . 
H18A H 0.0354 0.0495 0.2539 0.053 Uiso 1 1 calc R . . 
C19 C 0.2387(5) 0.2575(4) 0.3064(5) 0.066(2) Uani 1 1 d . . . 
H19A H 0.2987 0.2227 0.3052 0.079 Uiso 1 1 calc R . . 
H19B H 0.2625 0.3156 0.3225 0.079 Uiso 1 1 calc R . . 
C20 C 0.1639(6) 0.2582(4) 0.2240(4) 0.064(2) Uani 1 1 d . . . 
H20A H 0.1992 0.2718 0.1819 0.077 Uiso 1 1 calc R . . 
H20B H 0.1320 0.2018 0.2116 0.077 Uiso 1 1 calc R . . 
C21 C 0.0136(5) 0.3296(4) 0.1438(3) 0.0495(16) Uani 1 1 d . . . 
H21A H -0.0244 0.2762 0.1275 0.059 Uiso 1 1 calc R . . 
H21B H 0.0486 0.3444 0.1018 0.059 Uiso 1 1 calc R . . 
C22 C -0.0577(5) 0.3986(4) 0.1518(3) 0.0464(16) Uani 1 1 d . . . 
H22A H -0.0182 0.4488 0.1773 0.056 Uiso 1 1 calc R . . 
H22B H -0.1008 0.4149 0.0970 0.056 Uiso 1 1 calc R . . 
C23 C -0.1904(5) 0.4325(4) 0.2118(3) 0.0471(15) Uani 1 1 d . . . 
H23A H -0.2372 0.4480 0.1581 0.056 Uiso 1 1 calc R . . 
H23B H -0.1527 0.4838 0.2363 0.056 Uiso 1 1 calc R . . 
C24 C -0.2498(4) 0.3994(4) 0.2658(3) 0.0492(16) Uani 1 1 d . . . 
H24A H -0.3008 0.4419 0.2713 0.059 Uiso 1 1 calc R . . 
H24B H -0.2868 0.3477 0.2415 0.059 Uiso 1 1 calc R . . 
C25 C -0.2392(4) 0.3490(5) 0.3991(3) 0.0565(18) Uani 1 1 d . . . 
H25A H -0.2729 0.2950 0.3782 0.068 Uiso 1 1 calc R . . 
H25B H -0.2926 0.3901 0.4026 0.068 Uiso 1 1 calc R . . 
C26 C -0.1664(5) 0.3360(4) 0.4820(3) 0.0565(18) Uani 1 1 d . . . 
H26A H -0.1302 0.3895 0.5014 0.068 Uiso 1 1 calc R . . 
H26B H -0.2046 0.3191 0.5212 0.068 Uiso 1 1 calc R . . 
C27 C -0.0258(6) 0.2591(5) 0.5559(4) 0.064(2) Uani 1 1 d . . . 
H27A H -0.0634 0.2375 0.5940 0.077 Uiso 1 1 calc R . . 
H27B H 0.0069 0.3133 0.5778 0.077 Uiso 1 1 calc R . . 
C28 C 0.0541(6) 0.1967(5) 0.5493(4) 0.072(2) Uani 1 1 d . . . 
H28A H 0.0988 0.1832 0.6043 0.087 Uiso 1 1 calc R . . 
H28B H 0.0214 0.1438 0.5240 0.087 Uiso 1 1 calc R . . 
C29 C 0.2017(5) 0.1842(4) 0.5014(4) 0.0647(19) Uani 1 1 d . . . 
H29A H 0.1822 0.1259 0.4824 0.078 Uiso 1 1 calc R . . 
H29B H 0.2476 0.1815 0.5577 0.078 Uiso 1 1 calc R . . 
C30 C 0.2547(5) 0.2268(4) 0.4458(4) 0.0644(19) Uani 1 1 d . . . 
H30A H 0.2695 0.2864 0.4625 0.077 Uiso 1 1 calc R . . 
H30B H 0.3202 0.1979 0.4491 0.077 Uiso 1 1 calc R . . 
C31 C 0.2353(6) 0.4880(5) 0.1557(4) 0.076(2) Uani 1 1 d . . . 
H31A H 0.2145 0.4548 0.1978 0.091 Uiso 1 1 calc R . . 
H31B H 0.2749 0.5374 0.1829 0.091 Uiso 1 1 calc R . . 
  
loop_ 
 _atom_site_aniso_label 
 _atom_site_aniso_U_11 
 _atom_site_aniso_U_22 
 _atom_site_aniso_U_33 
 _atom_site_aniso_U_23 
 _atom_site_aniso_U_13 
 _atom_site_aniso_U_12 
K1 0.0366(8) 0.0497(8) 0.0344(7) 0.0028(5) 0.0105(5) 0.0043(6) 
Co1 0.0361(5) 0.0407(5) 0.0279(4) -0.0048(3) 0.0096(3) 0.0013(4) 
Cl1 0.0707(13) 0.0725(13) 0.0748(12) 0.0231(9) 0.0124(10) -0.0074(10) 
Cl2 0.0983(18) 0.0959(18) 0.1116(17) -0.0192(13) 0.0371(14) 0.0136(13) 
O1 0.043(2) 0.036(2) 0.0310(19) -0.0036(16) 0.0112(17) -0.0012(18) 
O2 0.038(2) 0.055(3) 0.037(2) -0.0073(18) 0.0076(18) 0.0049(19) 
O3 0.052(3) 0.050(3) 0.040(2) 0.0002(17) 0.0226(19) 0.009(2) 
O4 0.032(2) 0.060(3) 0.066(3) -0.008(2) 0.008(2) -0.001(2) 
O5 0.052(3) 0.051(3) 0.049(2) -0.0112(19) 0.025(2) 0.002(2) 
O6 0.046(3) 0.041(2) 0.038(2) 0.0009(17) 0.0130(18) 0.0001(19) 
O7 0.028(2) 0.065(3) 0.040(2) -0.0091(19) 0.0089(18) -0.0022(19) 
O8 0.059(3) 0.064(3) 0.032(2) -0.0049(19) 0.012(2) -0.006(2) 
O9 0.054(3) 0.051(3) 0.050(2) 0.0078(19) 0.000(2) 0.014(2) 
C1 0.025(3) 0.044(4) 0.036(3) 0.004(3) 0.014(2) 0.009(3) 
C2 0.062(4) 0.039(4) 0.031(3) 0.000(2) 0.027(3) 0.001(3) 
C3 0.072(5) 0.041(4) 0.057(4) -0.006(3) 0.034(4) -0.002(3) 
C4 0.057(4) 0.050(5) 0.063(4) 0.019(3) 0.029(4) 0.013(3) 
C5 0.052(4) 0.077(5) 0.045(4) 0.026(4) 0.016(3) 0.021(4) 
C6 0.037(4) 0.051(4) 0.038(3) -0.001(3) 0.005(3) 0.002(3) 
C7 0.047(4) 0.033(3) 0.033(3) 0.008(2) 0.005(3) 0.004(3) 
C8 0.044(4) 0.035(4) 0.051(4) -0.002(3) 0.010(3) -0.003(3) 
C9 0.060(5) 0.047(4) 0.063(4) -0.005(3) 0.021(4) 0.006(3) 
C10 0.045(4) 0.044(4) 0.064(4) 0.013(3) 0.015(3) 0.013(3) 
C11 0.040(4) 0.059(4) 0.043(3) 0.014(3) -0.002(3) 0.004(3) 
C12 0.040(4) 0.051(4) 0.028(3) 0.000(3) -0.002(3) 0.003(3) 
C13 0.045(4) 0.034(3) 0.046(3) -0.008(3) 0.019(3) -0.005(3) 
C14 0.063(5) 0.043(4) 0.061(4) -0.007(3) 0.031(4) 0.004(3) 
C15 0.059(5) 0.049(5) 0.098(6) -0.018(4) 0.051(5) -0.015(4) 
C16 0.089(6) 0.059(5) 0.067(5) -0.023(4) 0.046(5) -0.030(4) 
C17 0.078(5) 0.062(5) 0.039(3) -0.014(3) 0.019(3) -0.019(4) 
C18 0.050(4) 0.044(4) 0.039(3) -0.014(3) 0.012(3) -0.003(3) 
C19 0.040(4) 0.061(5) 0.104(6) -0.012(4) 0.034(4) -0.002(3) 
C20 0.071(5) 0.050(4) 0.094(6) -0.012(4) 0.059(5) -0.002(4) 
C21 0.074(5) 0.042(4) 0.041(3) -0.010(3) 0.030(3) -0.012(3) 
C22 0.063(4) 0.047(4) 0.028(3) 0.005(3) 0.012(3) -0.018(3) 
C23 0.042(4) 0.044(4) 0.052(4) 0.002(3) 0.005(3) 0.001(3) 
C24 0.032(4) 0.060(4) 0.048(4) -0.001(3) 0.000(3) 0.009(3) 
C25 0.033(4) 0.095(5) 0.043(3) -0.013(3) 0.014(3) -0.002(3) 
C26 0.051(4) 0.080(5) 0.047(4) -0.018(3) 0.028(3) 0.000(4) 
C27 0.084(6) 0.072(5) 0.035(4) 0.002(3) 0.015(4) 0.001(4) 
C28 0.097(6) 0.071(5) 0.039(4) 0.015(3) 0.003(4) 0.004(5) 
C29 0.063(5) 0.051(5) 0.066(4) 0.001(3) -0.006(4) 0.020(4) 
C30 0.035(4) 0.059(5) 0.086(5) -0.017(4) -0.006(4) 0.016(3) 
C31 0.077(6) 0.075(5) 0.062(4) -0.018(4) -0.004(4) 0.006(4) 
  
_geom_special_details 
; 
 All esds (except the esd in the dihedral angle between two l.s. planes) 
 are estimated using the full covariance matrix.  The cell esds are taken 
 into account individually in the estimation of esds in distances, angles 
 and torsion angles; correlations between esds in cell parameters are only 
 used when they are defined by crystal symmetry.  An approximate (isotropic) 
 treatment of cell esds is used for estimating esds involving l.s. planes. 
; 
  
loop_ 
 _geom_bond_atom_site_label_1 
 _geom_bond_atom_site_label_2 
 _geom_bond_distance 
 _geom_bond_site_symmetry_2 
 _geom_bond_publ_flag 
K1 O5 2.762(4) . ? 
K1 O7 2.786(4) . ? 
K1 O6 2.786(4) . ? 
K1 O4 2.804(4) . ? 
K1 O8 2.811(4) . ? 
K1 O9 2.838(4) . ? 
K1 C16 3.240(6) . ? 
K1 C17 3.251(7) . ? 
K1 C10 3.302(6) 2 ? 
K1 C15 3.458(7) . ? 
K1 C18 3.493(5) . ? 
K1 C20 3.509(6) . ? 
Co1 O3 1.901(3) . ? 
Co1 O2 1.911(4) . ? 
Co1 O1 1.962(3) . ? 
Co1 O1 2.000(3) 3 ? 
Cl1 C31 1.718(7) . ? 
Cl2 C31 1.739(7) . ? 
O1 C1 1.341(6) . ? 
O1 Co1 2.000(3) 3 ? 
O2 C7 1.318(6) . ? 
O3 C13 1.315(6) . ? 
O4 C30 1.410(7) . ? 
O4 C19 1.421(7) . ? 
O5 C20 1.417(7) . ? 
O5 C21 1.434(7) . ? 
O6 C23 1.401(6) . ? 
O6 C22 1.417(6) . ? 
O7 C24 1.412(6) . ? 
O7 C25 1.425(6) . ? 
O8 C27 1.398(7) . ? 
O8 C26 1.408(7) . ? 
O9 C28 1.402(7) . ? 
O9 C29 1.421(7) . ? 
C1 C6 1.384(7) . ? 
C1 C2 1.389(7) . ? 
C2 C3 1.360(7) . ? 
C3 C4 1.348(8) . ? 
C4 C5 1.364(9) . ? 
C5 C6 1.375(8) . ? 
C7 C12 1.381(7) . ? 
C7 C8 1.383(7) . ? 
C8 C9 1.380(8) . ? 
C9 C10 1.366(8) . ? 
C9 K1 3.539(6) 2_545 ? 
C10 C11 1.367(8) . ? 
C10 K1 3.302(6) 2_545 ? 
C11 C12 1.361(8) . ? 
C13 C18 1.370(7) . ? 
C13 C14 1.377(8) . ? 
C14 C15 1.386(8) . ? 
C15 C16 1.361(9) . ? 
C16 C17 1.357(10) . ? 
C17 C18 1.383(7) . ? 
C19 C20 1.474(9) . ? 
C21 C22 1.477(8) . ? 
C23 C24 1.463(7) . ? 
C25 C26 1.483(8) . ? 
C27 C28 1.482(9) . ? 
C29 C30 1.485(9) . ? 
  
loop_ 
 _geom_angle_atom_site_label_1 
 _geom_angle_atom_site_label_2 
 _geom_angle_atom_site_label_3 
 _geom_angle 
 _geom_angle_site_symmetry_1 
 _geom_angle_site_symmetry_3 
 _geom_angle_publ_flag 
O5 K1 O7 117.54(12) . . ? 
O5 K1 O6 61.49(11) . . ? 
O7 K1 O6 59.68(10) . . ? 
O5 K1 O4 61.50(12) . . ? 
O7 K1 O4 164.23(12) . . ? 
O6 K1 O4 122.89(12) . . ? 
O5 K1 O8 169.38(12) . . ? 
O7 K1 O8 60.17(12) . . ? 
O6 K1 O8 119.11(12) . . ? 
O4 K1 O8 117.49(13) . . ? 
O5 K1 O9 117.72(13) . . ? 
O7 K1 O9 114.58(11) . . ? 
O6 K1 O9 166.65(12) . . ? 
O4 K1 O9 58.99(12) . . ? 
O8 K1 O9 58.91(12) . . ? 
O5 K1 C16 120.73(14) . . ? 
O7 K1 C16 89.40(17) . . ? 
O6 K1 C16 100.93(18) . . ? 
O4 K1 C16 104.58(18) . . ? 
O8 K1 C16 69.89(14) . . ? 
O9 K1 C16 90.75(18) . . ? 
O5 K1 C17 106.06(13) . . ? 
O7 K1 C17 113.53(16) . . ? 
O6 K1 C17 112.15(14) . . ? 
O4 K1 C17 80.68(16) . . ? 
O8 K1 C17 83.75(13) . . ? 
O9 K1 C17 81.11(14) . . ? 
C16 K1 C17 24.13(17) . . ? 
O5 K1 C10 81.06(13) . 2 ? 
O7 K1 C10 70.12(14) . 2 ? 
O6 K1 C10 79.89(14) . 2 ? 
O4 K1 C10 94.57(15) . 2 ? 
O8 K1 C10 88.58(13) . 2 ? 
O9 K1 C10 86.81(14) . 2 ? 
C16 K1 C10 155.99(16) . 2 ? 
C17 K1 C10 167.79(16) . 2 ? 
O5 K1 C15 108.76(14) . . ? 
O7 K1 C15 77.45(14) . . ? 
O6 K1 C15 77.78(16) . . ? 
O4 K1 C15 118.18(15) . . ? 
O8 K1 C15 81.26(14) . . ? 
O9 K1 C15 113.71(16) . . ? 
C16 K1 C15 23.16(16) . . ? 
C17 K1 C15 40.93(18) . . ? 
C10 K1 C15 146.80(17) 2 . ? 
O5 K1 C18 83.15(12) . . ? 
O7 K1 C18 123.14(13) . . ? 
O6 K1 C18 97.65(13) . . ? 
O4 K1 C18 72.62(13) . . ? 
O8 K1 C18 106.90(13) . . ? 
O9 K1 C18 95.42(13) . . ? 
C16 K1 C18 40.84(15) . . ? 
C17 K1 C18 23.30(13) . . ? 
C10 K1 C18 163.15(15) 2 . ? 
C15 K1 C18 45.88(15) . . ? 
O5 K1 C20 22.31(14) . . ? 
O7 K1 C20 139.60(15) . . ? 
O6 K1 C20 81.41(15) . . ? 
O4 K1 C20 42.00(15) . . ? 
O8 K1 C20 159.43(16) . . ? 
O9 K1 C20 100.85(16) . . ? 
C16 K1 C20 109.66(16) . . ? 
C17 K1 C20 89.72(16) . . ? 
C10 K1 C20 94.24(16) 2 . ? 
C15 K1 C20 106.27(16) . . ? 
C18 K1 C20 68.93(14) . . ? 
O3 Co1 O2 114.12(16) . . ? 
O3 Co1 O1 117.00(16) . . ? 
O2 Co1 O1 117.76(15) . . ? 
O3 Co1 O1 104.80(15) . 3 ? 
O2 Co1 O1 117.75(15) . 3 ? 
O1 Co1 O1 80.33(15) . 3 ? 
C1 O1 Co1 130.6(3) . . ? 
C1 O1 Co1 129.5(3) . 3 ? 
Co1 O1 Co1 99.67(15) . 3 ? 
C7 O2 Co1 126.1(3) . . ? 
C13 O3 Co1 128.6(4) . . ? 
C30 O4 C19 112.0(5) . . ? 
C30 O4 K1 115.6(3) . . ? 
C19 O4 K1 113.3(4) . . ? 
C20 O5 C21 113.5(4) . . ? 
C20 O5 K1 110.0(3) . . ? 
C21 O5 K1 110.4(3) . . ? 
C23 O6 C22 112.7(4) . . ? 
C23 O6 K1 116.7(3) . . ? 
C22 O6 K1 113.2(3) . . ? 
C24 O7 C25 111.6(4) . . ? 
C24 O7 K1 114.8(3) . . ? 
C25 O7 K1 114.2(3) . . ? 
C27 O8 C26 110.2(4) . . ? 
C27 O8 K1 117.7(4) . . ? 
C26 O8 K1 115.6(3) . . ? 
C28 O9 C29 112.9(5) . . ? 
C28 O9 K1 112.5(4) . . ? 
C29 O9 K1 115.9(3) . . ? 
O1 C1 C6 122.1(5) . . ? 
O1 C1 C2 120.4(4) . . ? 
C6 C1 C2 117.4(5) . . ? 
C3 C2 C1 120.3(5) . . ? 
C4 C3 C2 122.5(6) . . ? 
C3 C4 C5 118.0(6) . . ? 
C4 C5 C6 121.3(6) . . ? 
C5 C6 C1 120.4(6) . . ? 
O2 C7 C12 119.6(5) . . ? 
O2 C7 C8 123.6(5) . . ? 
C12 C7 C8 116.8(5) . . ? 
C9 C8 C7 121.9(6) . . ? 
C10 C9 C8 120.0(6) . . ? 
C10 C9 K1 68.9(4) . 2_545 ? 
C8 C9 K1 125.3(4) . 2_545 ? 
C9 C10 C11 118.6(6) . . ? 
C9 C10 K1 88.4(4) . 2_545 ? 
C11 C10 K1 117.0(4) . 2_545 ? 
C12 C11 C10 121.7(6) . . ? 
C11 C12 C7 121.1(5) . . ? 
O3 C13 C18 122.5(5) . . ? 
O3 C13 C14 120.1(5) . . ? 
C18 C13 C14 117.4(5) . . ? 
C13 C14 C15 120.4(6) . . ? 
C16 C15 C14 120.7(7) . . ? 
C16 C15 K1 69.4(4) . . ? 
C14 C15 K1 88.7(4) . . ? 
C17 C16 C15 120.0(6) . . ? 
C17 C16 K1 78.4(4) . . ? 
C15 C16 K1 87.4(4) . . ? 
C16 C17 C18 119.1(7) . . ? 
C16 C17 K1 77.5(4) . . ? 
C18 C17 K1 88.2(4) . . ? 
C13 C18 C17 122.5(6) . . ? 
C13 C18 K1 88.8(3) . . ? 
C17 C18 K1 68.5(3) . . ? 
O4 C19 C20 108.9(5) . . ? 
O5 C20 C19 109.0(5) . . ? 
O5 C20 K1 47.7(2) . . ? 
C19 C20 K1 81.9(3) . . ? 
O5 C21 C22 107.0(4) . . ? 
O5 C21 K1 47.2(2) . . ? 
C22 C21 K1 80.3(3) . . ? 
O6 C22 C21 109.5(4) . . ? 
O6 C23 C24 109.4(5) . . ? 
O7 C24 C23 110.2(5) . . ? 
O7 C25 C26 108.9(5) . . ? 
O8 C26 C25 109.8(4) . . ? 
O8 C27 C28 109.5(5) . . ? 
O9 C28 C27 108.4(5) . . ? 
O9 C29 C30 107.9(5) . . ? 
O4 C30 C29 108.7(5) . . ? 
Cl1 C31 Cl2 112.6(4) . . ? 
  
_diffrn_measured_fraction_theta_max    0.999 
_diffrn_reflns_theta_full              24.00 
_diffrn_measured_fraction_theta_full   0.999 
_refine_diff_density_max    0.521 
_refine_diff_density_min   -0.347 
_refine_diff_density_rms    0.074
#===END
